# Supplementary material
Source: PubMed Central journal article supplement (PMC3566574)
Supplement: NIHMS436882-supplement-ESI_2.pdf [file NIHMS436882-supplement-ESI_2.pdf]

**$^1\text{H}$  NMR spectra and RP-HPLC chromatograms for all compounds.**

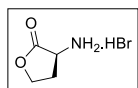

**L-Homoserine lactone hydrobromide salt (1).**

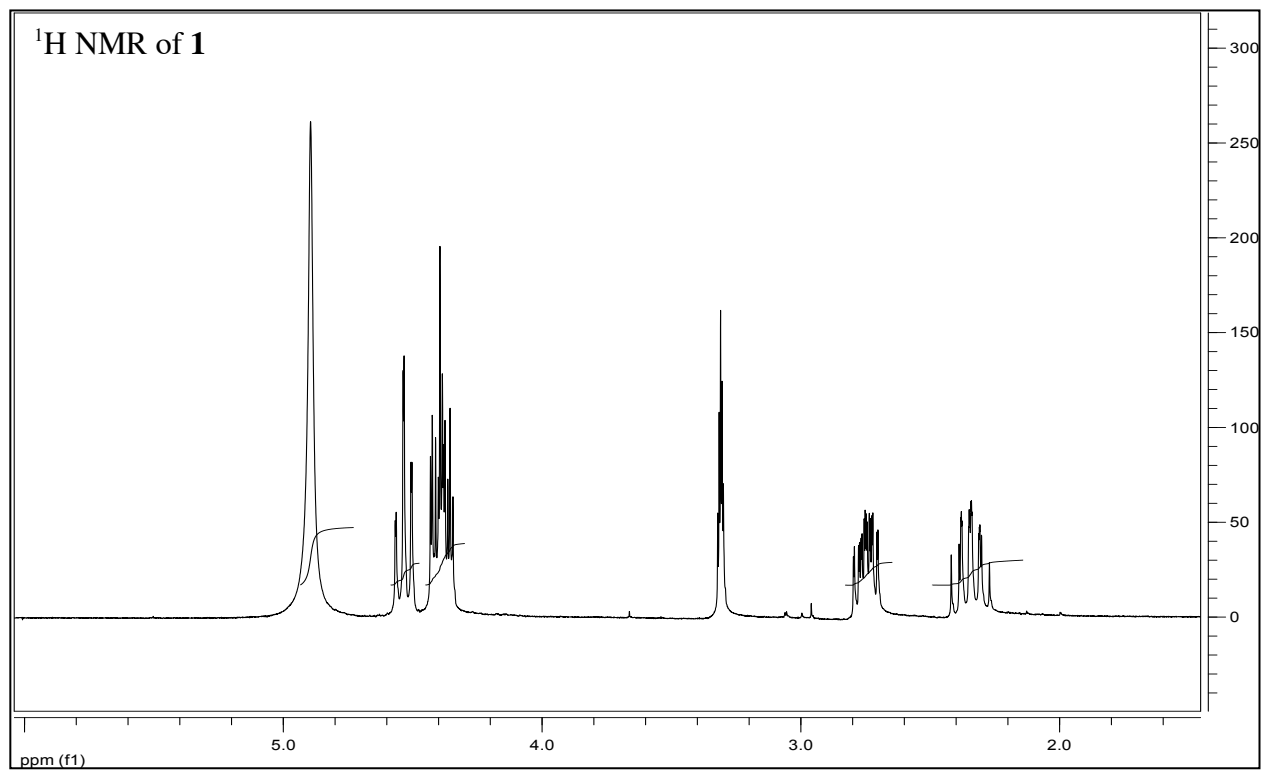

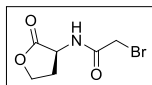

***N*-Bromoacetyl-L-homoserine lactone (2).**

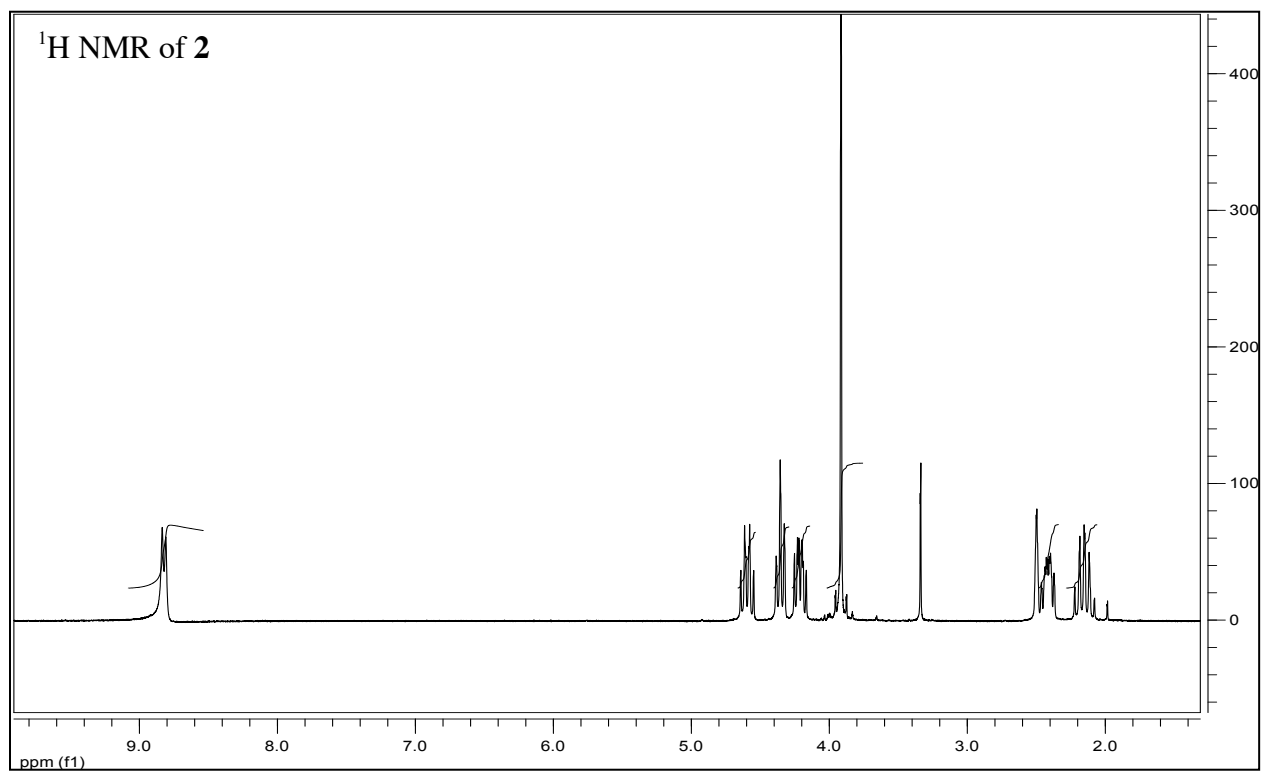

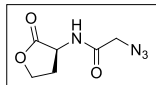

**N-Azidoacetyl-L-homoserine lactone (3).**

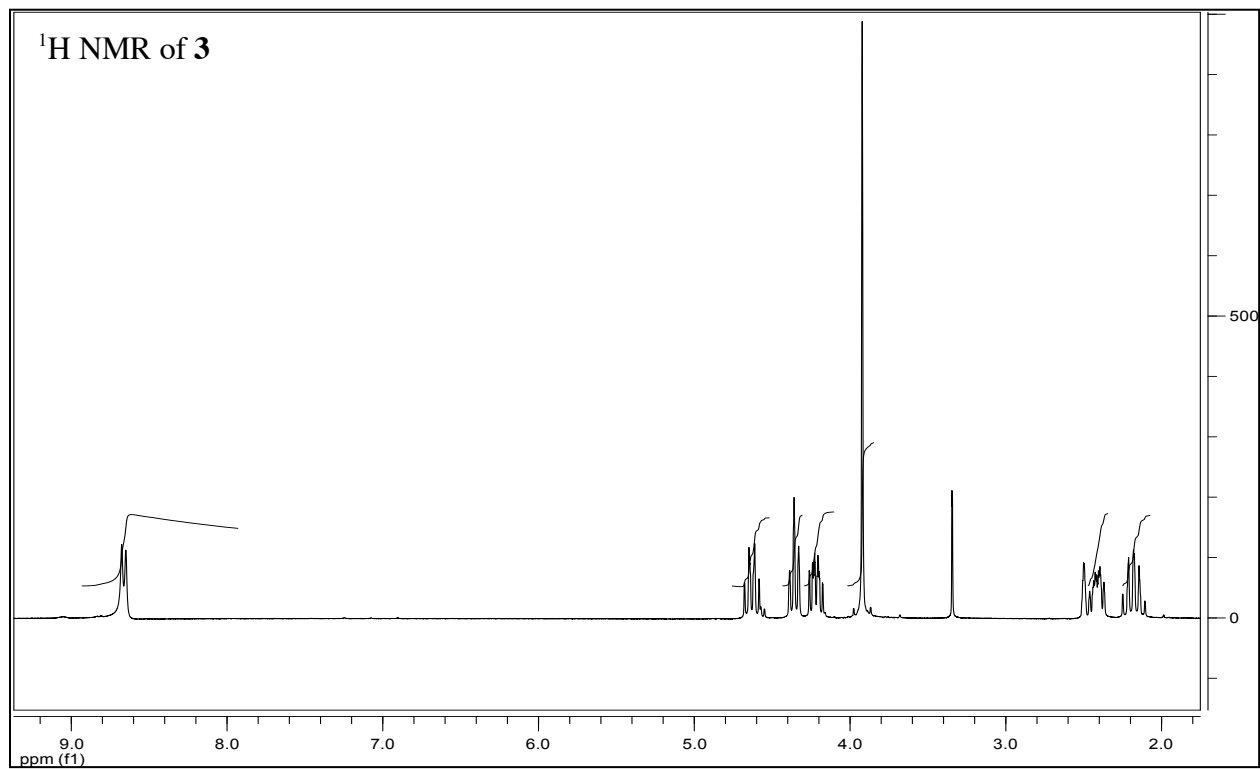

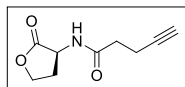

***N*-1-Oxo-4-pentyn-L-homoserine lactone (4).**

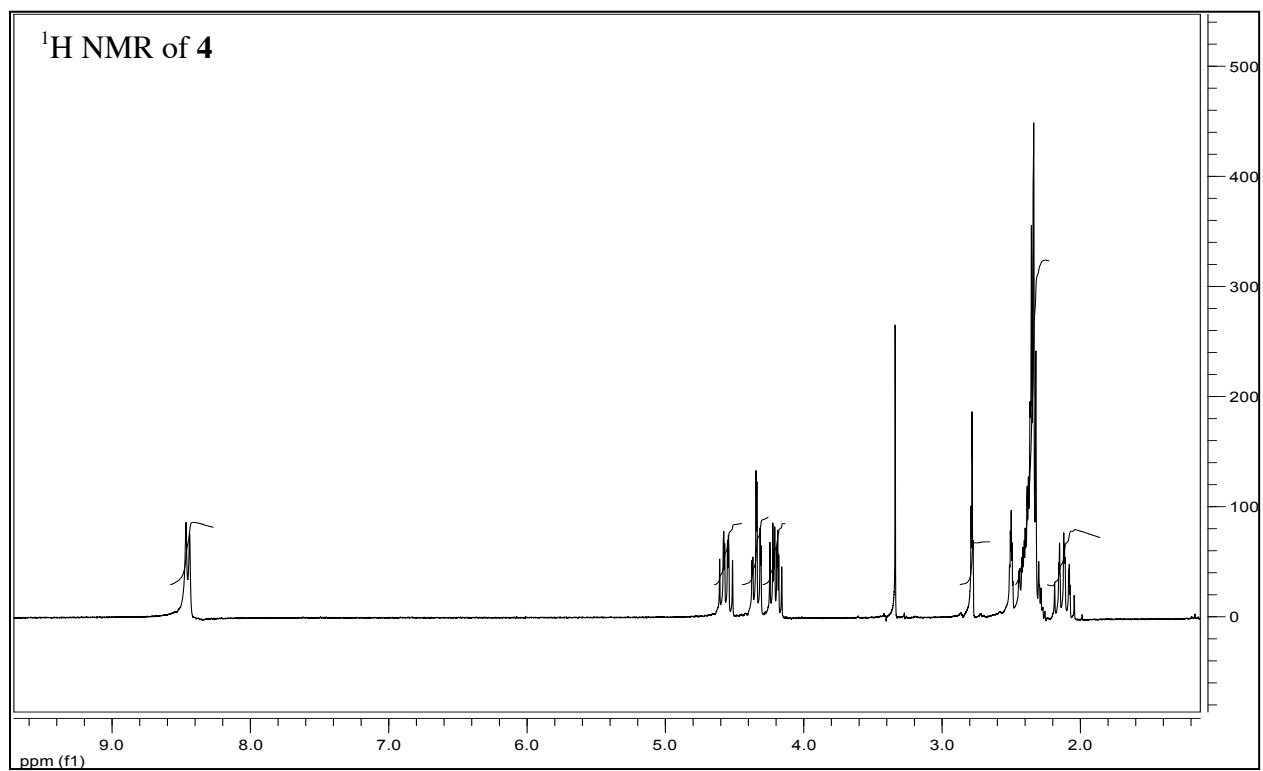

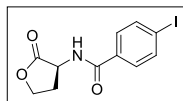

**N-(4-Iodobenzoyl)-L-homoserine lactone (7).**

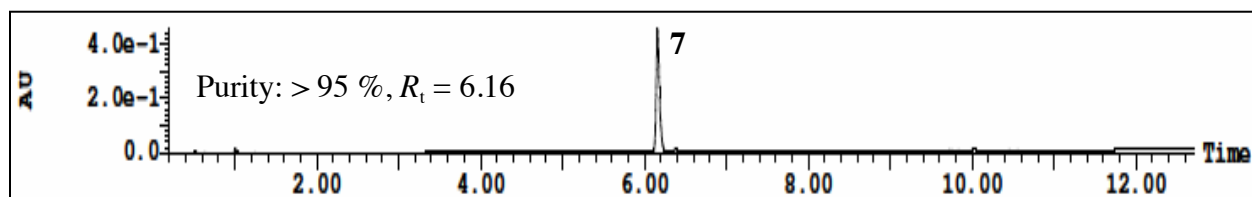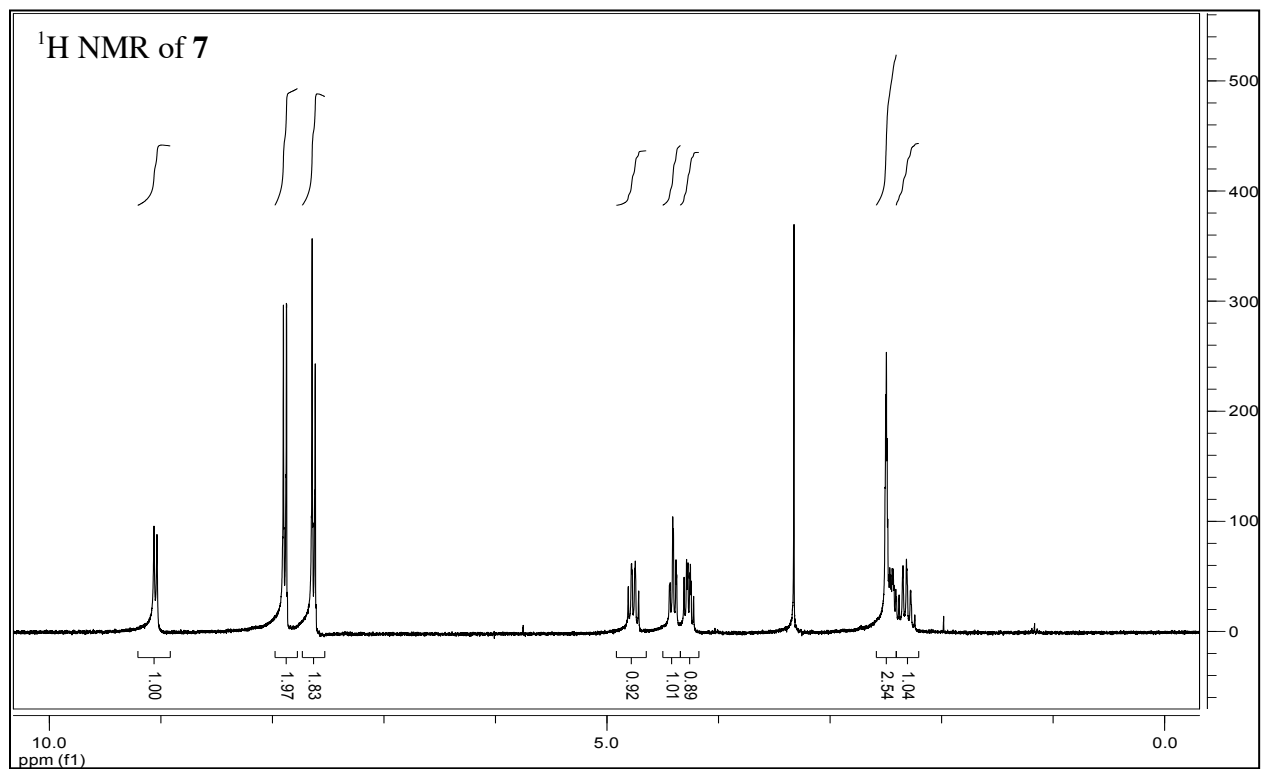

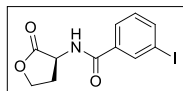

**N-(3-Iodobenzoyl)-L-homoserine lactone (8).**

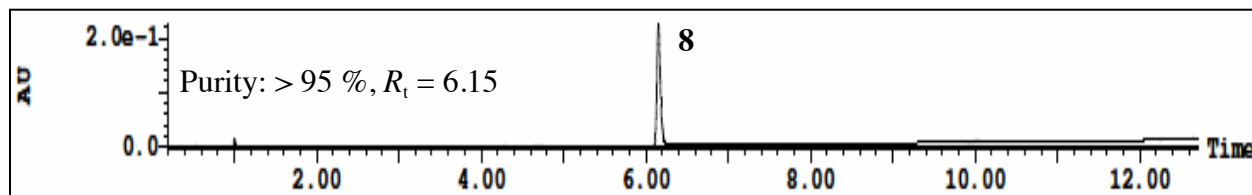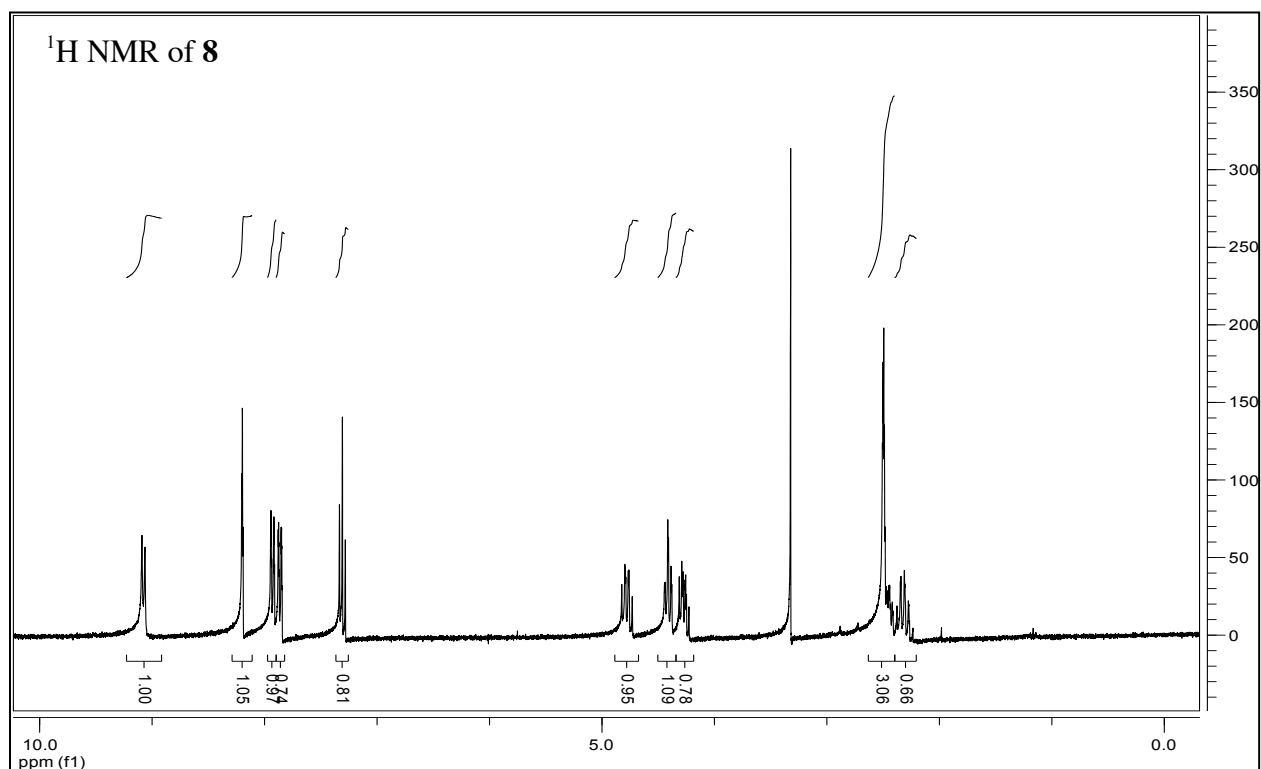

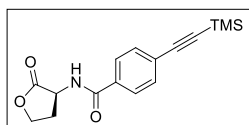

***N*-(4-Trimethylsilylethynylbenzoyl)-L-homoserine lactone (9).**

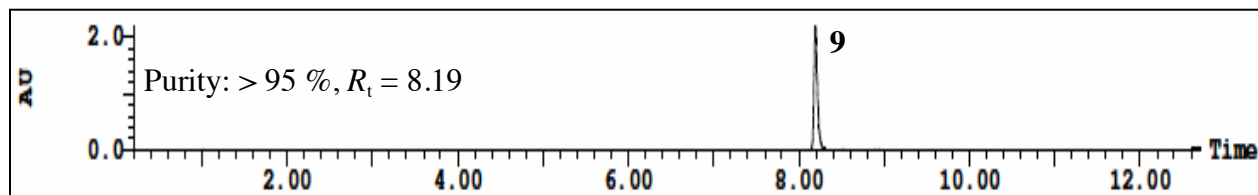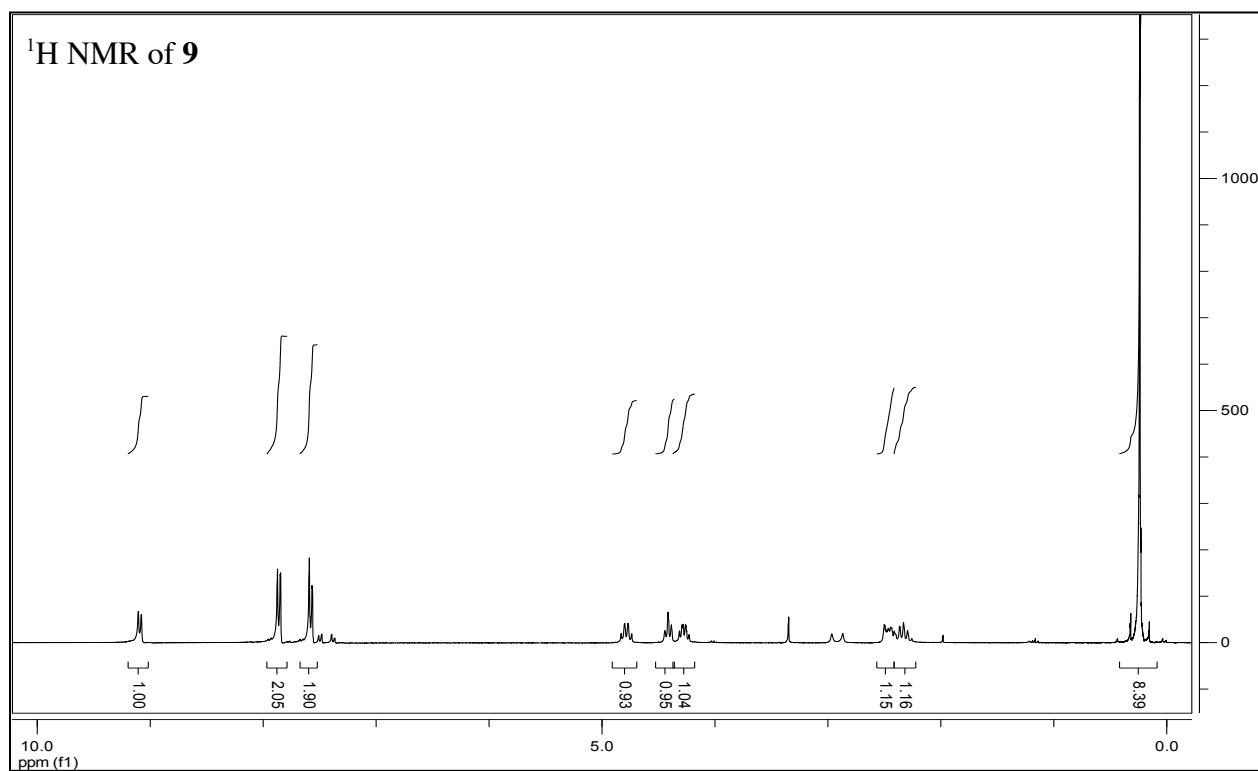

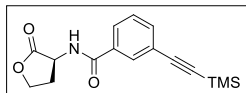

***N*-(3-Trimethylsilylethynylbenzoyl)-L-homoserine lactone (10).**

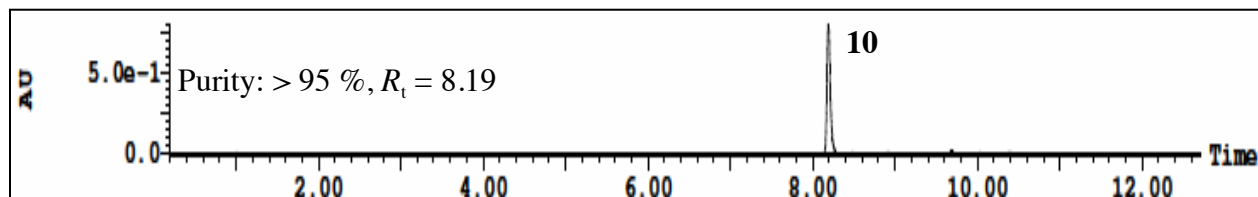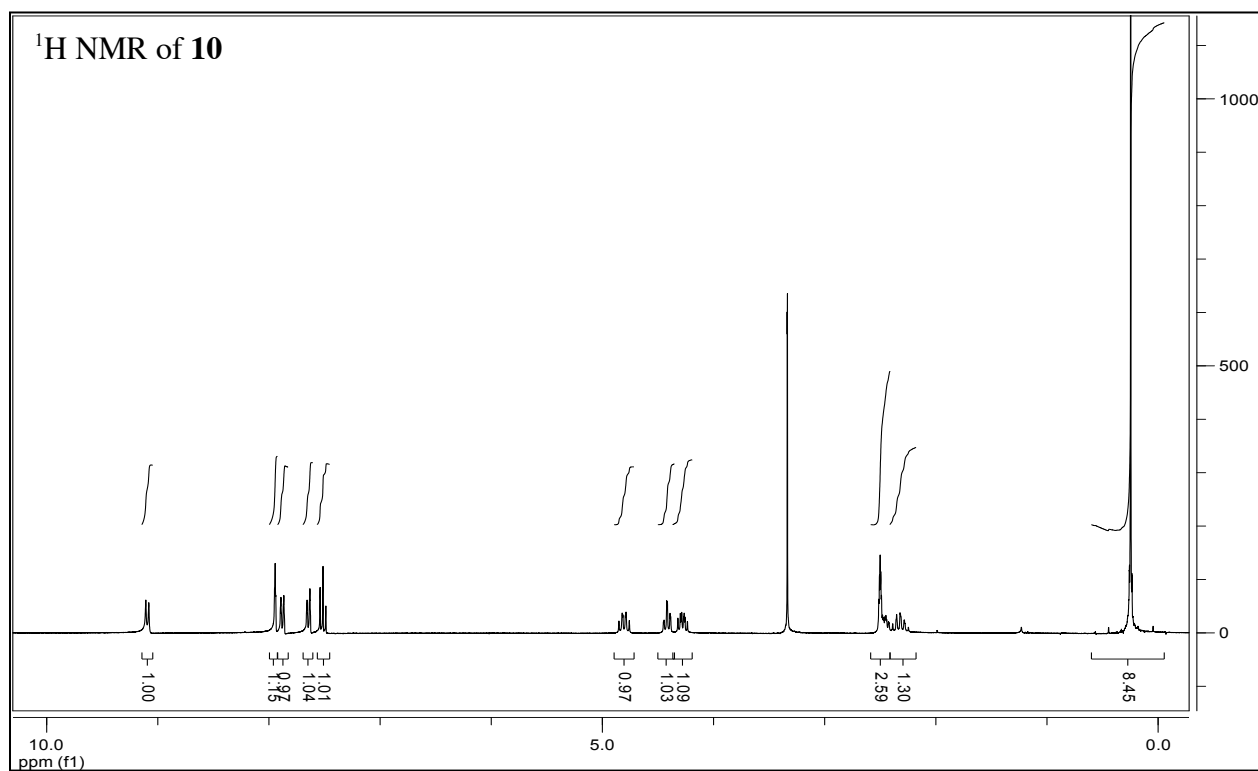



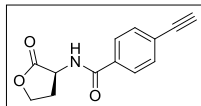

**N-(4-Ethynylbenzoyl)-L-homoserine lactone (11).**

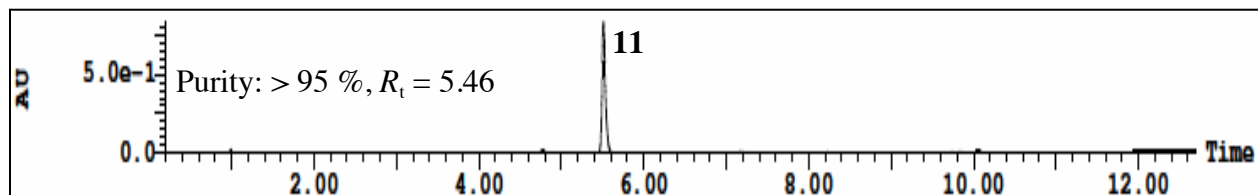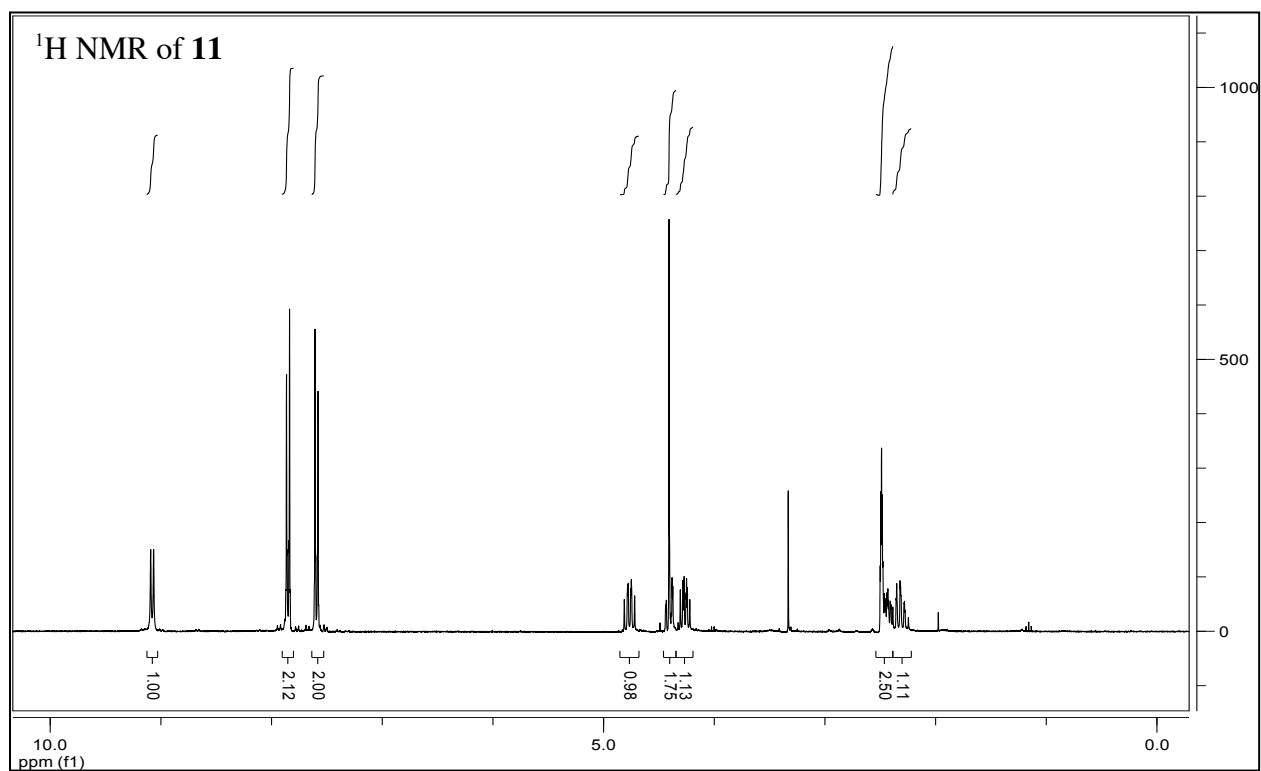

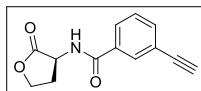

***N*-(3-Ethynylbenzoyl)-L-homoserine lactone (12).**

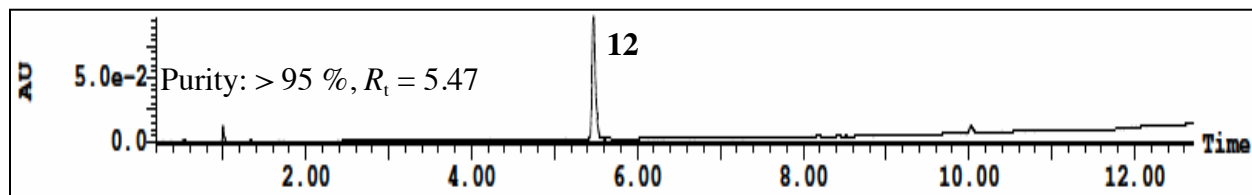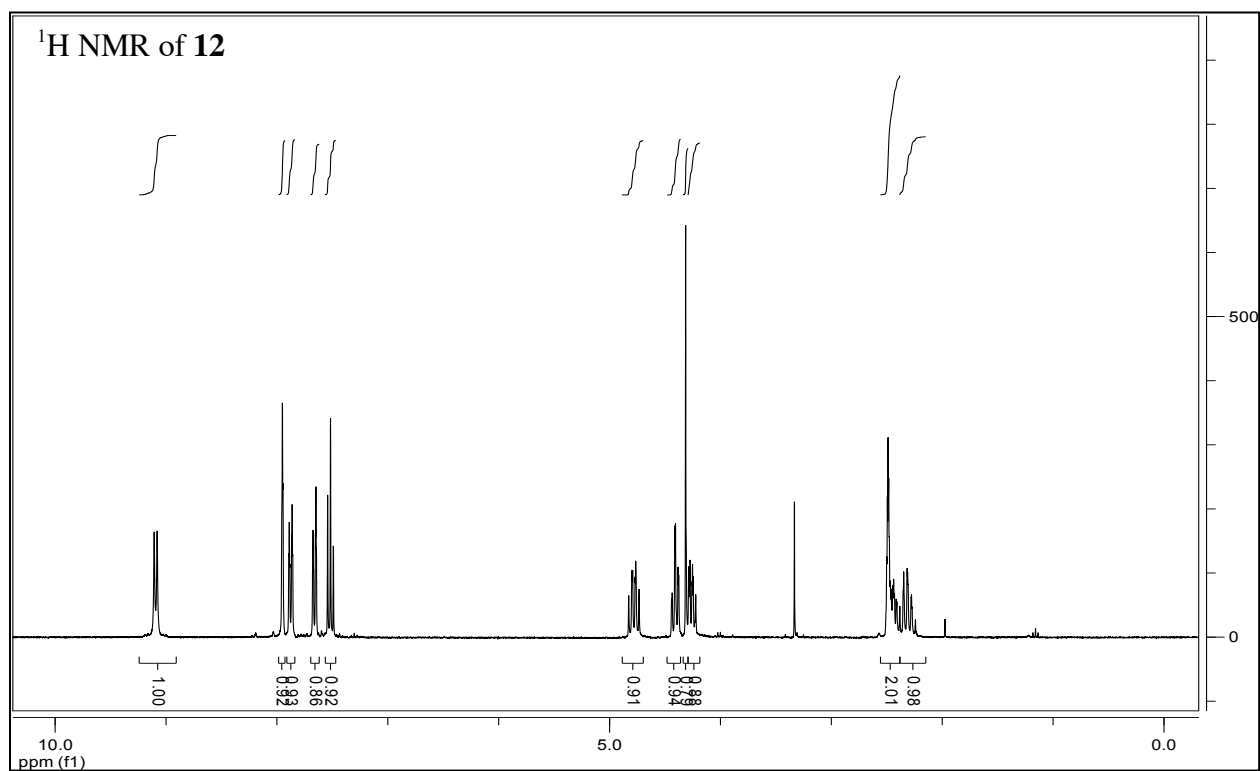

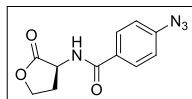

**N-(4-Azidobenzoyl)-L-homoserine lactone (13).**

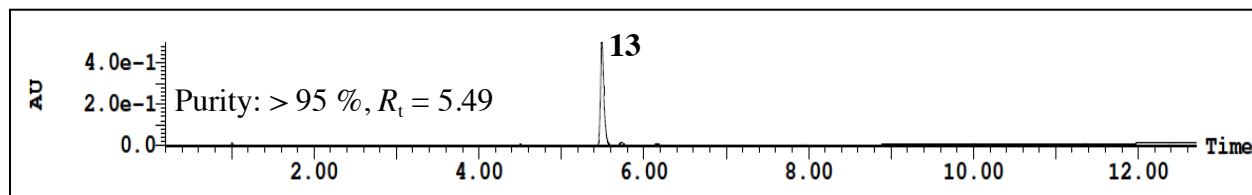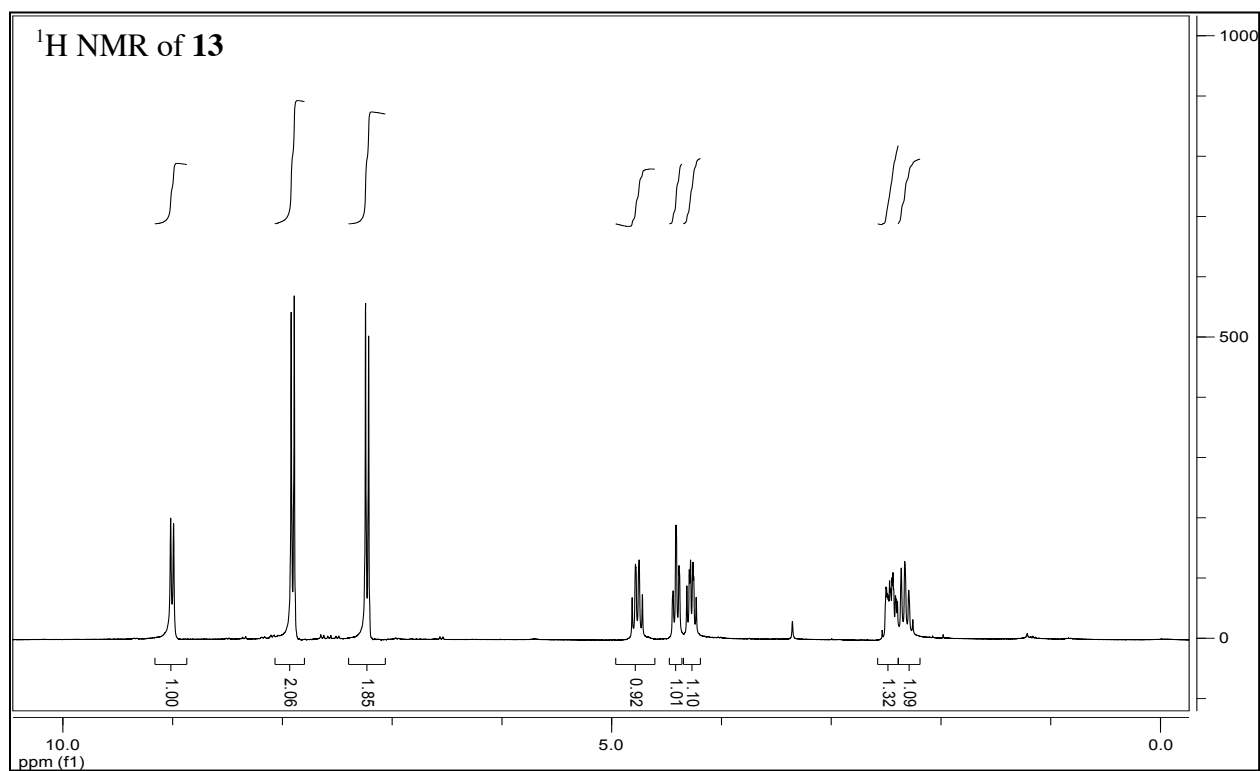

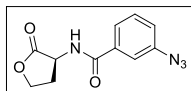

**N-(3-Azidobenzoyl)-L-homoserine lactone (14).**

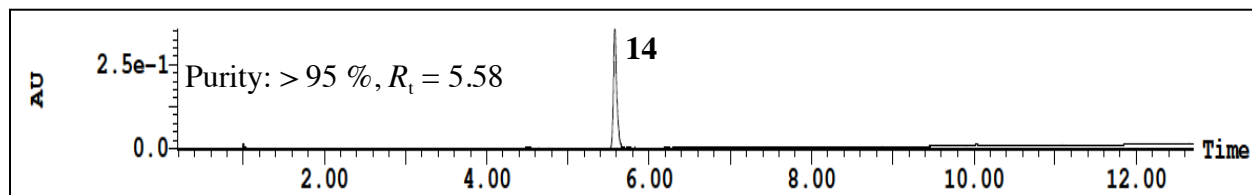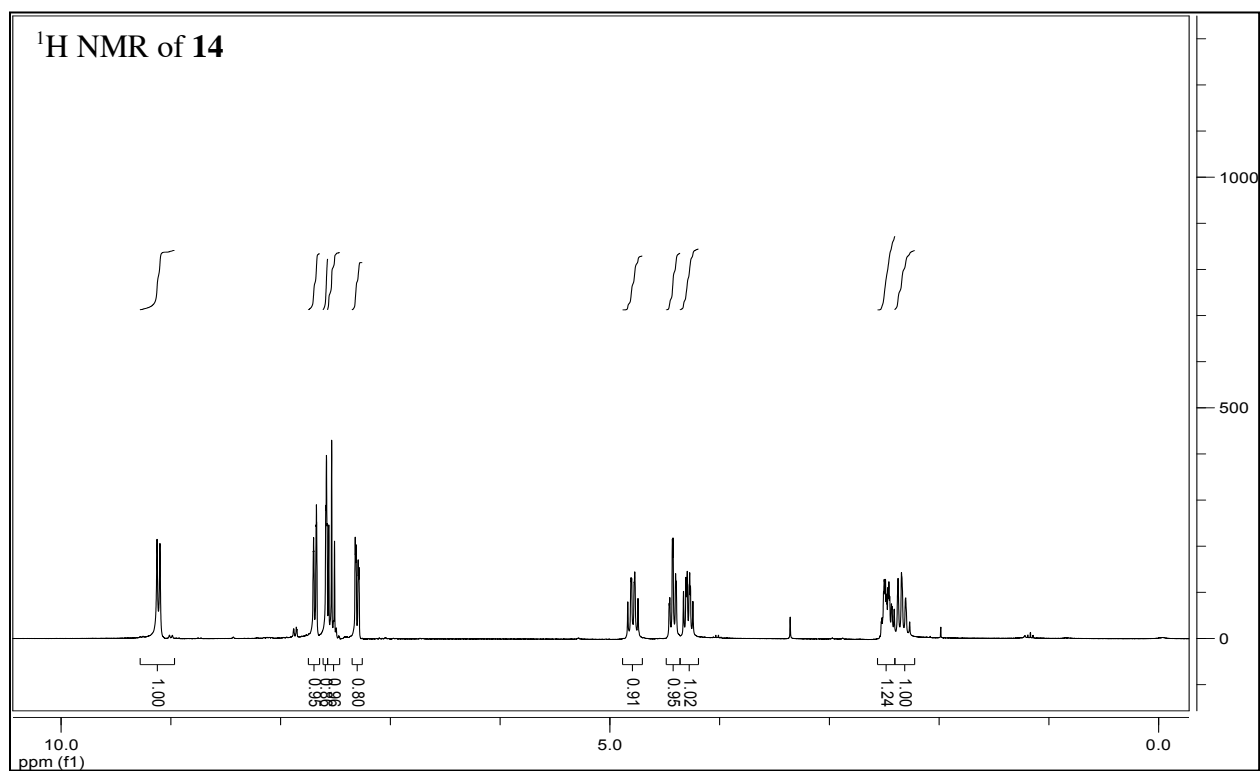

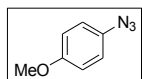

**4-Azidoanisole.**

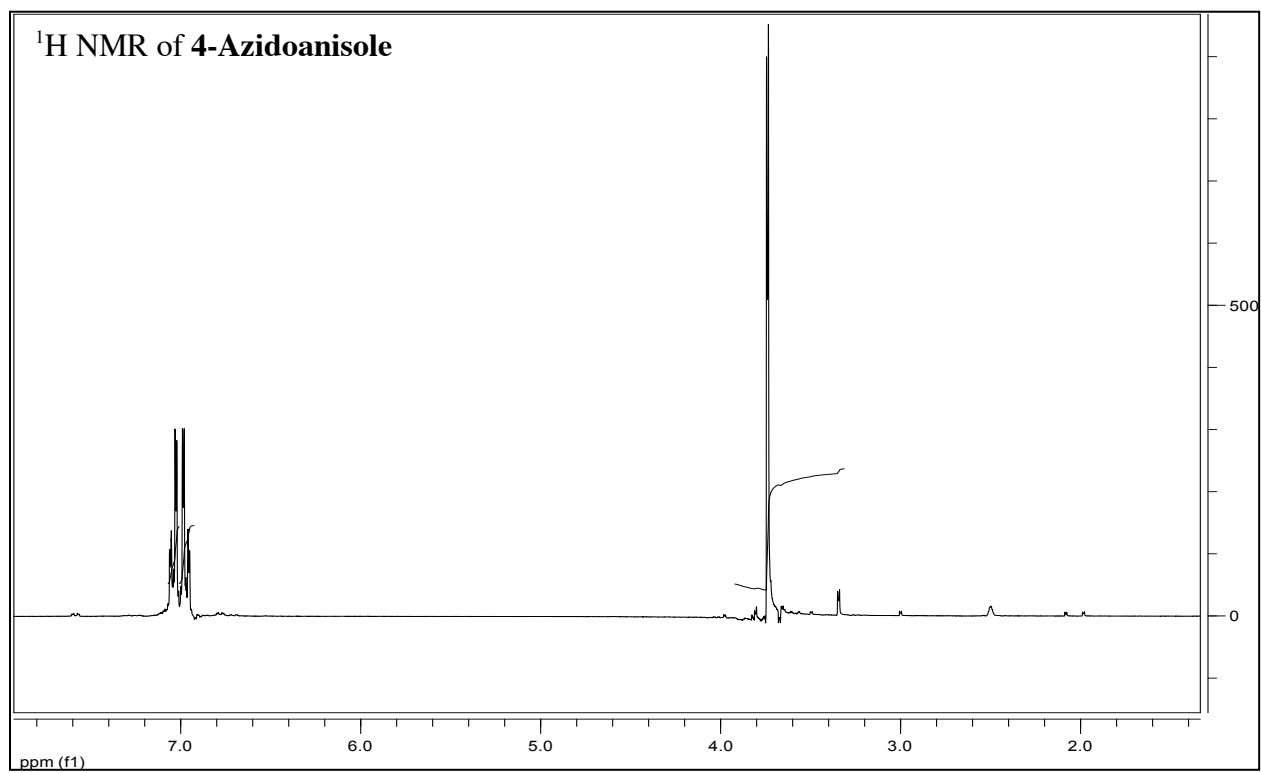

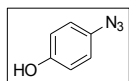

**4-Azidophenol**

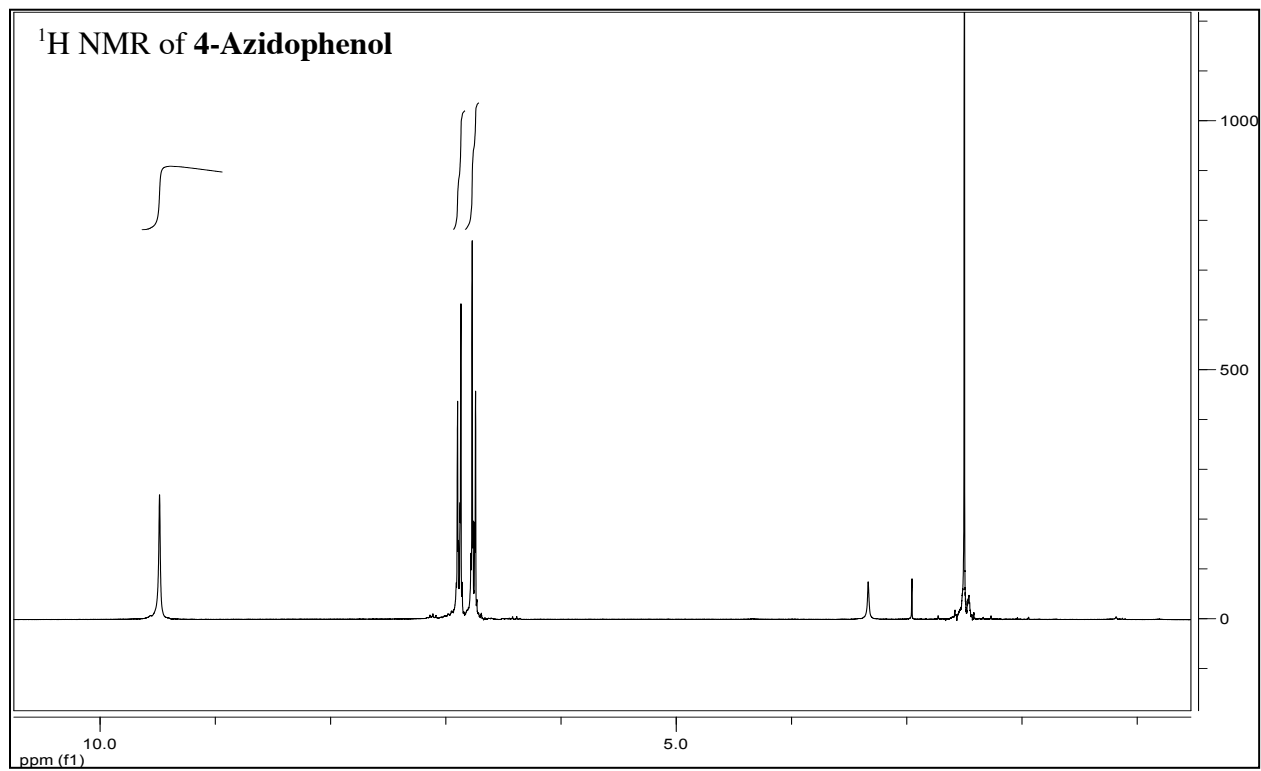

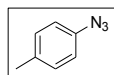

**4-Azidotoluene**

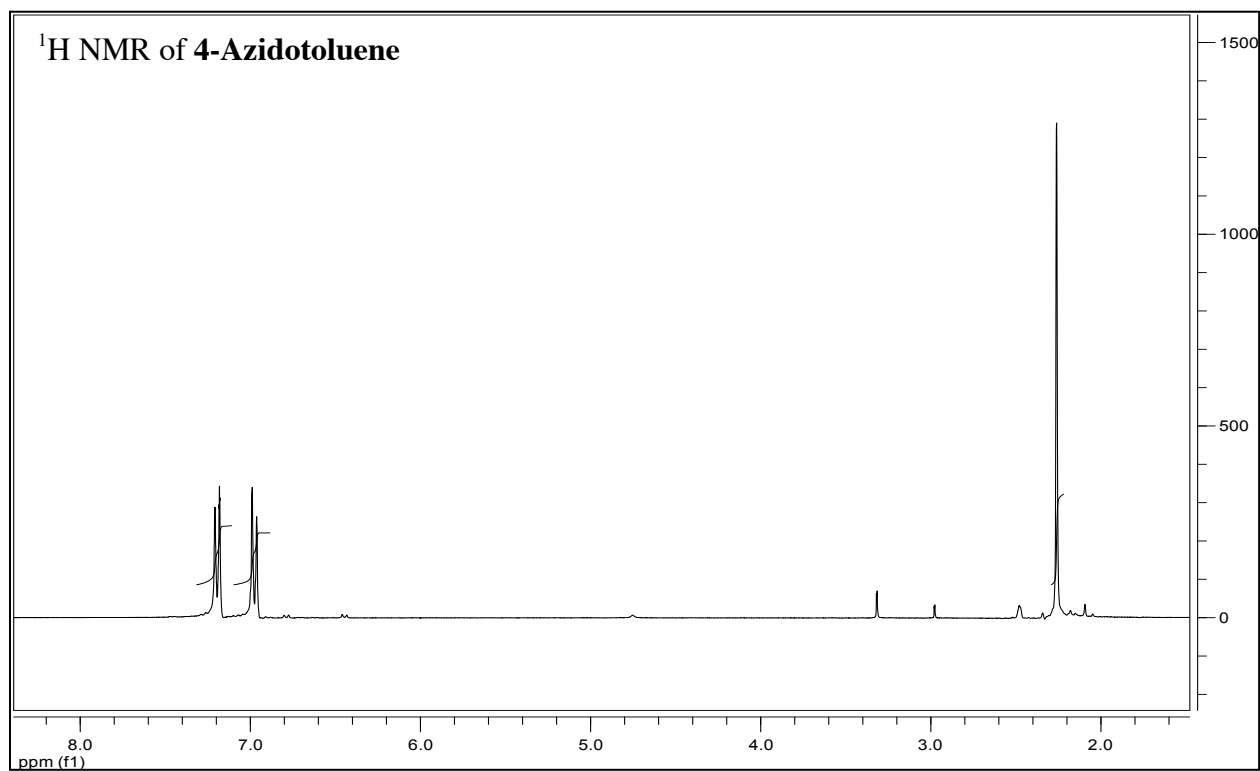

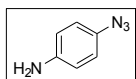

**4-Azidoaniline.**

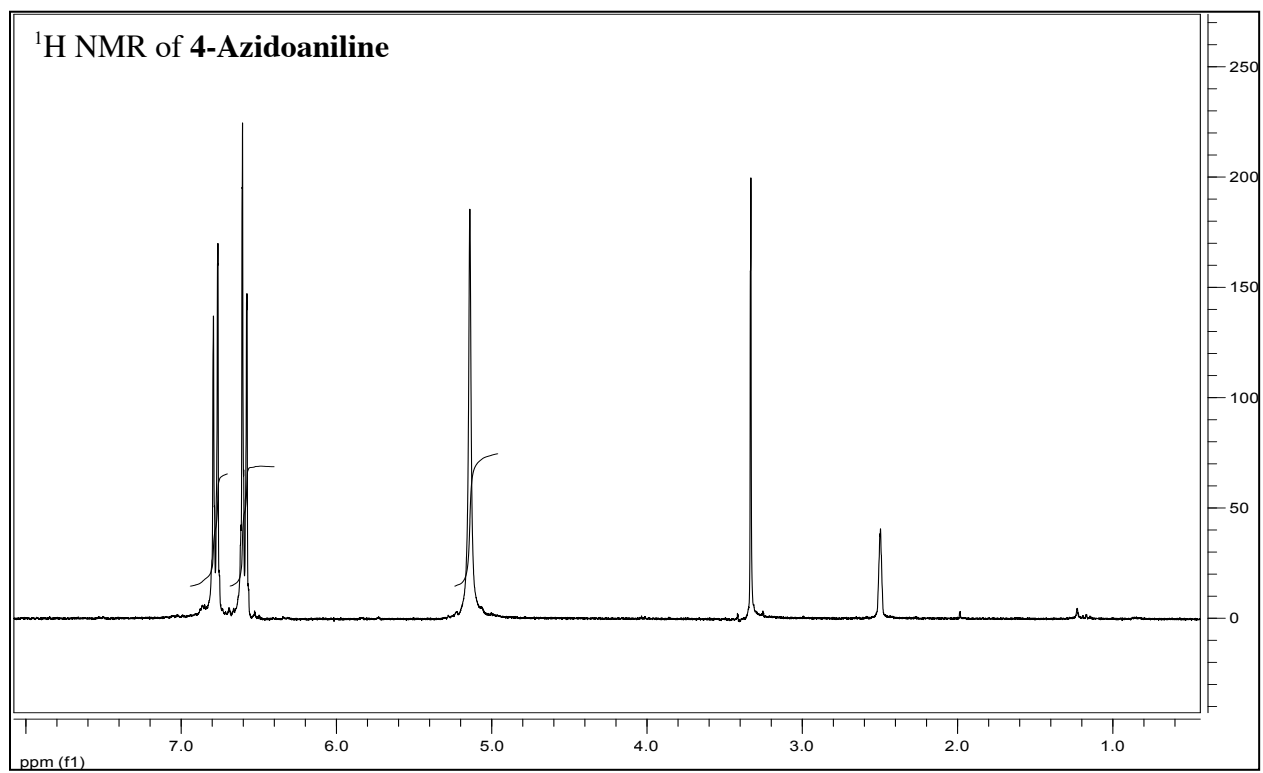



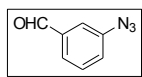

**3-Azidobenzaldehyde.**

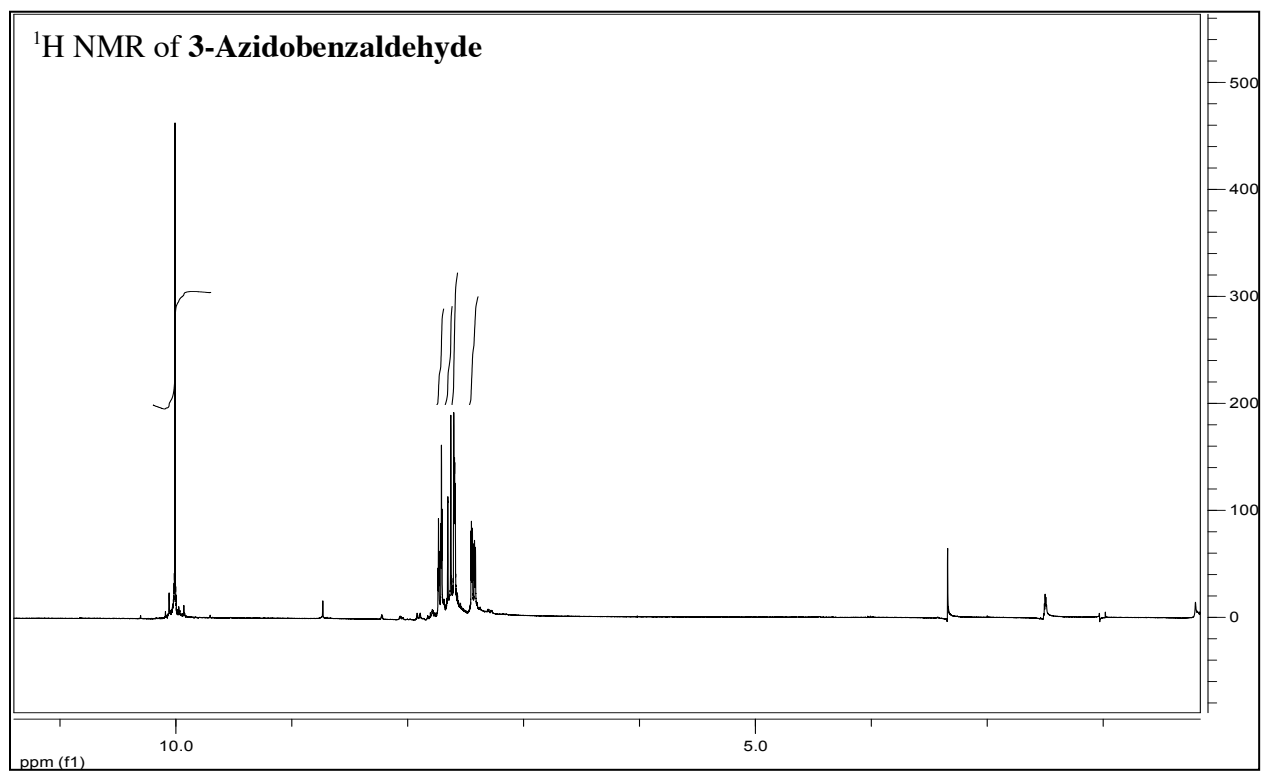

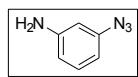

**3-Azidoaniline**

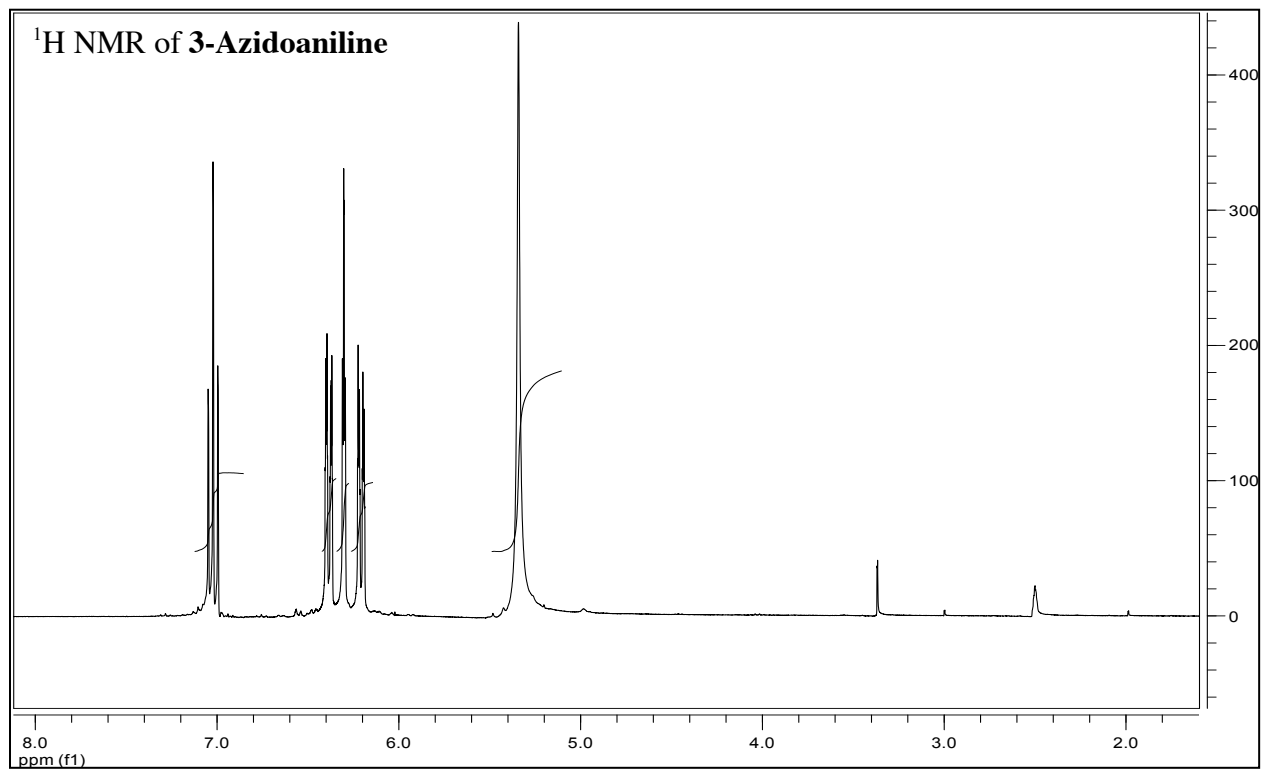

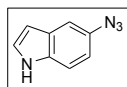

**5-Azidoindole.**

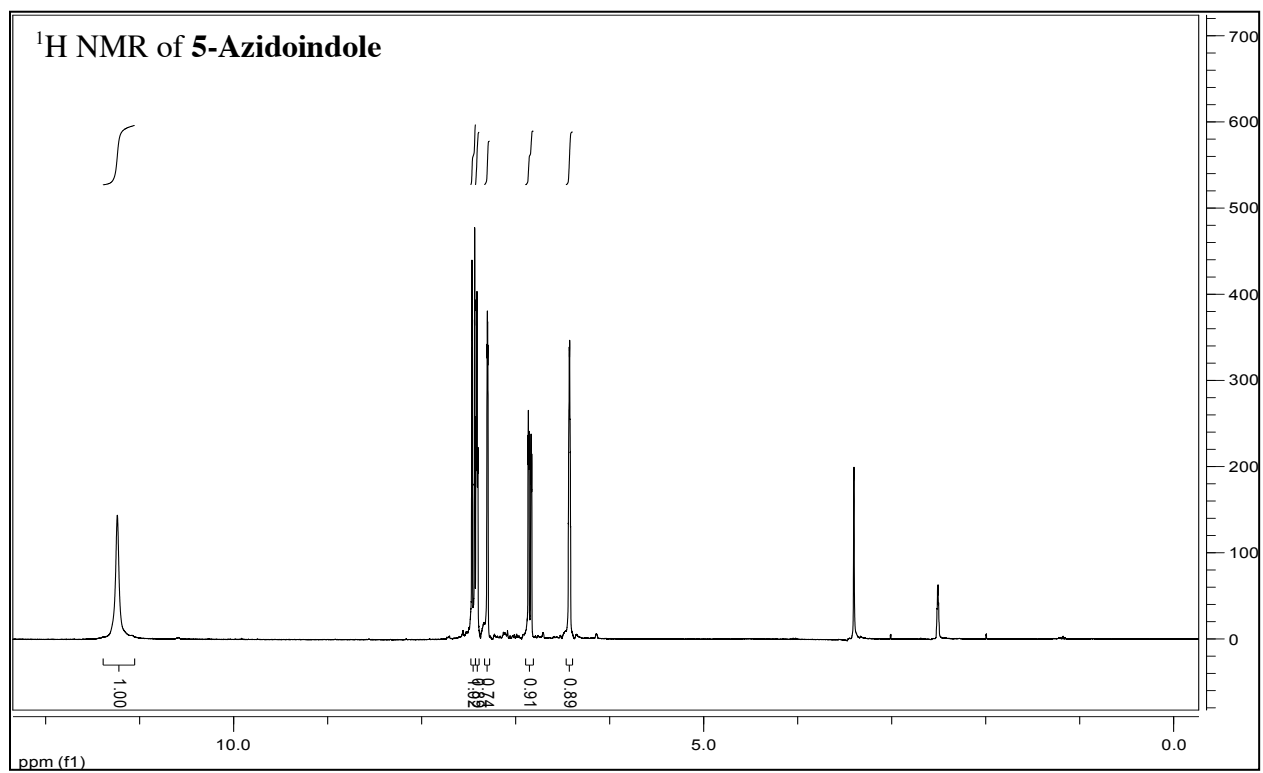

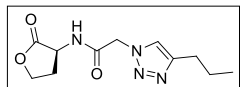

**Triazole I-A.**

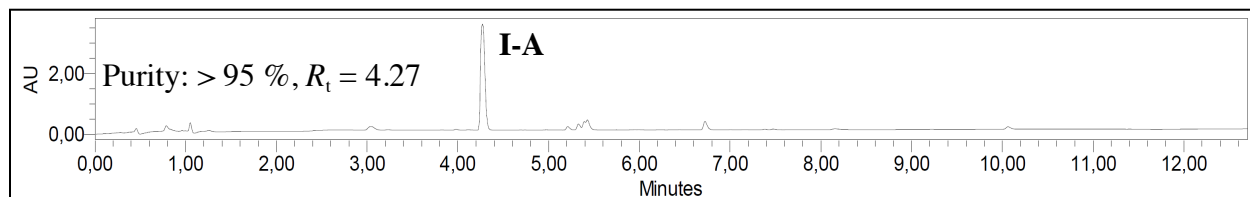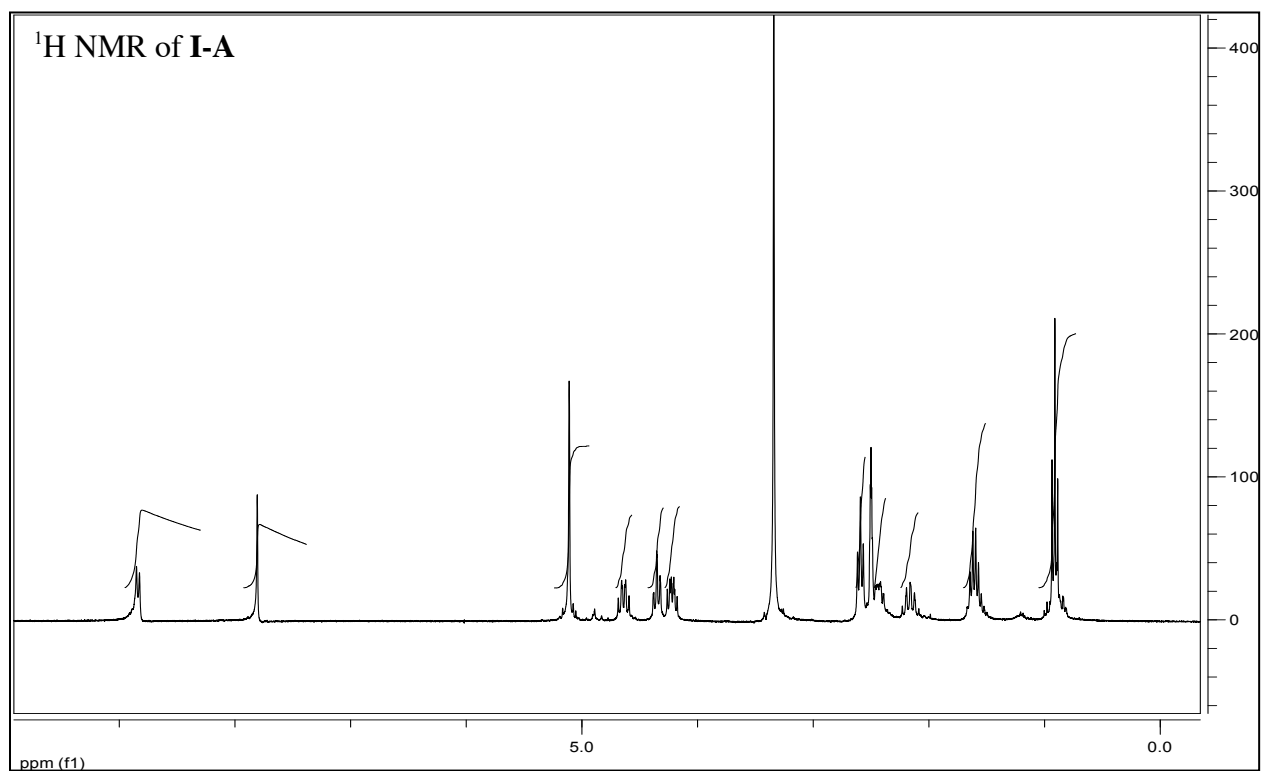

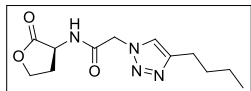

**Triazole I-B.**

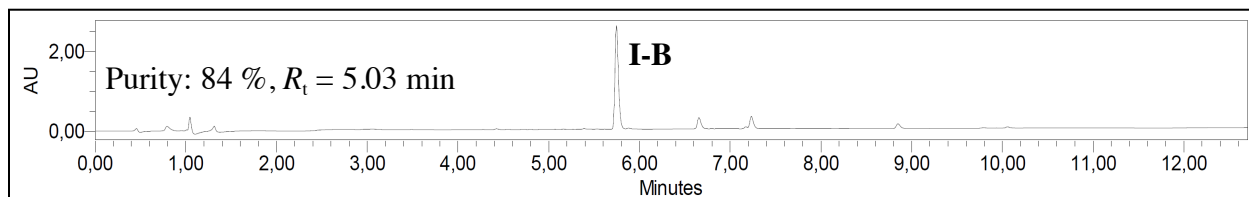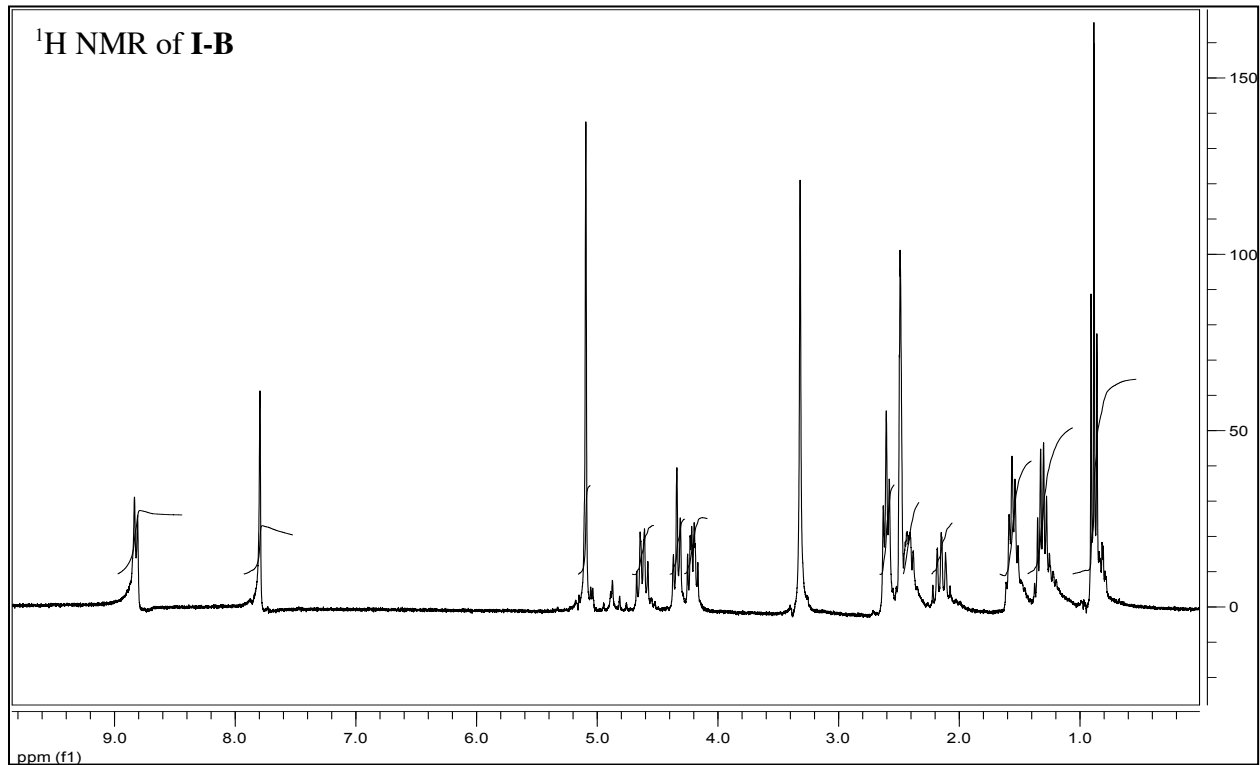

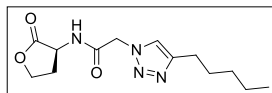

**Triazole I-C.**

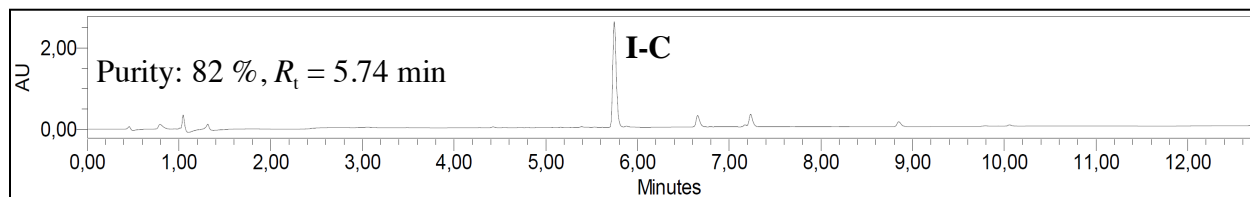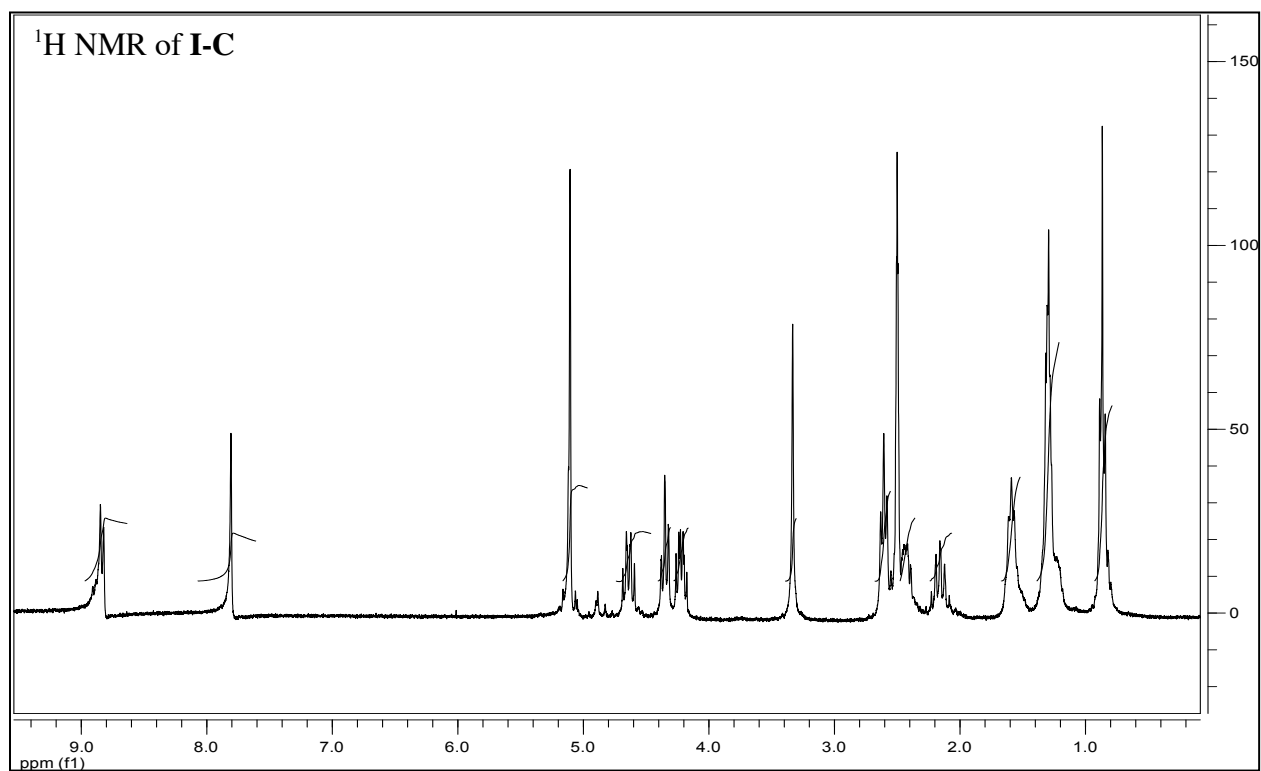

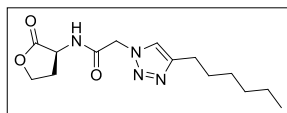

**Triazole I-D.**

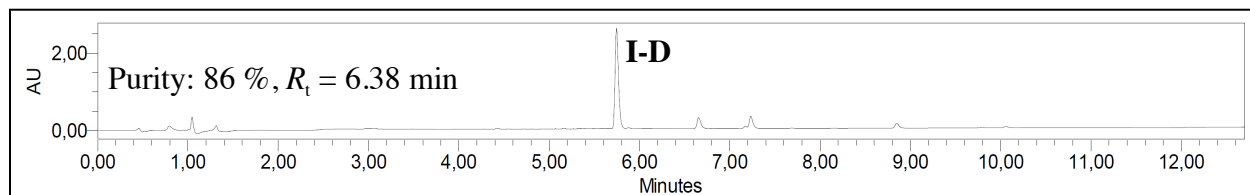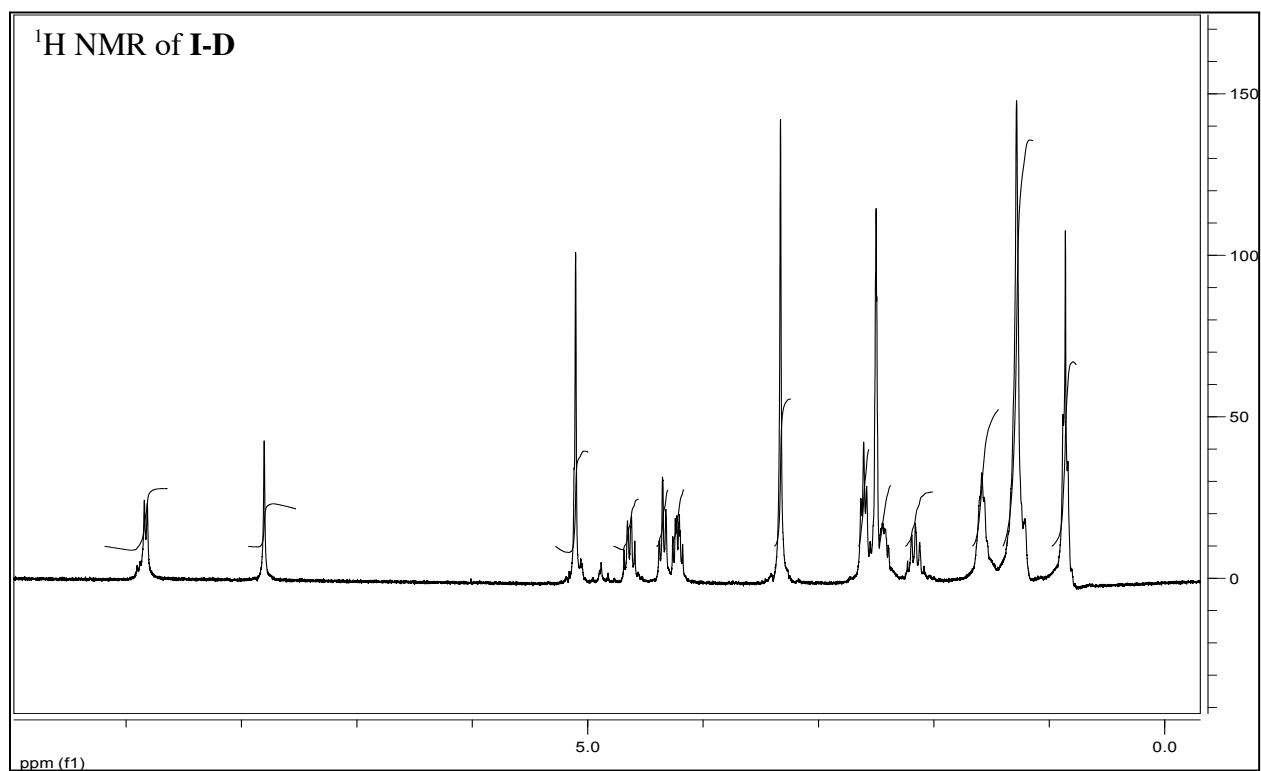

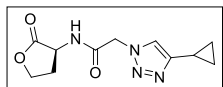

**Triazole I-E.**

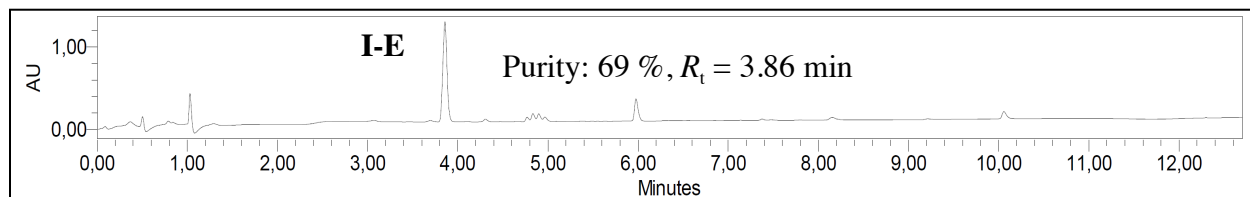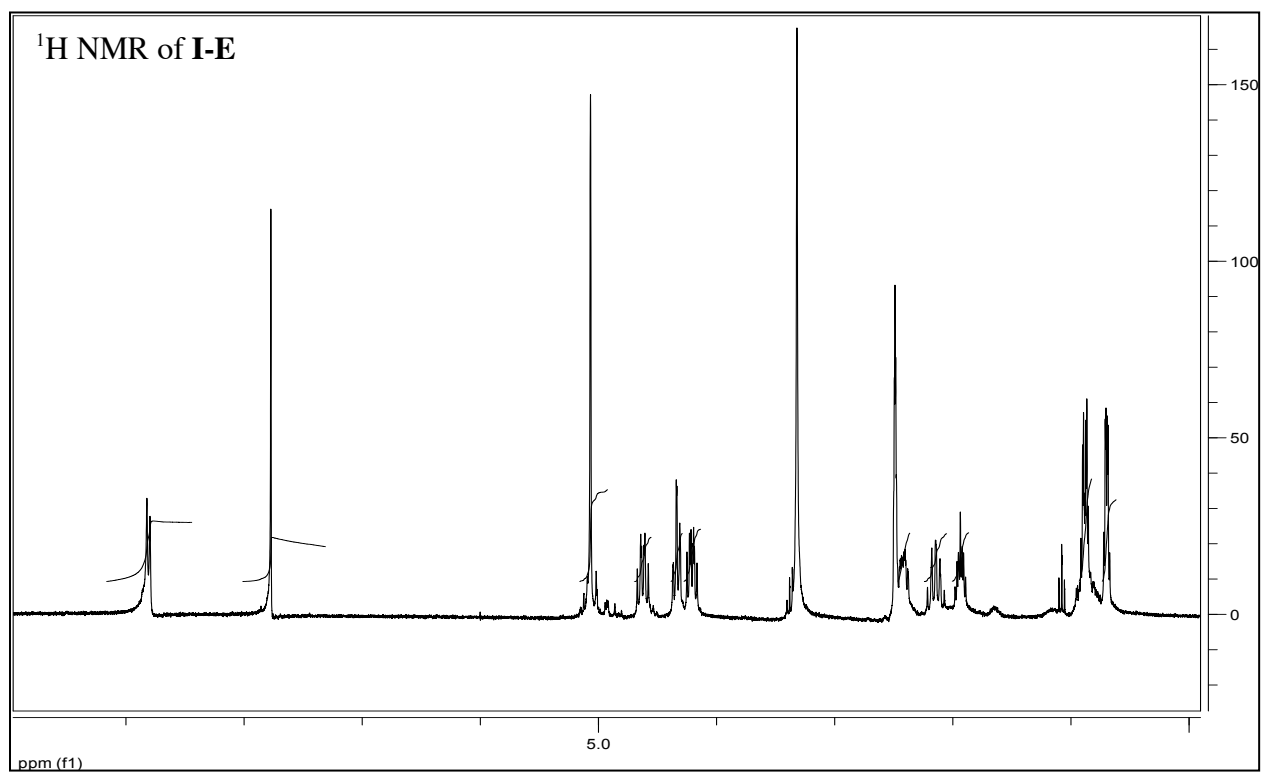



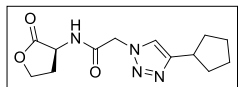

**Triazole I-F.**

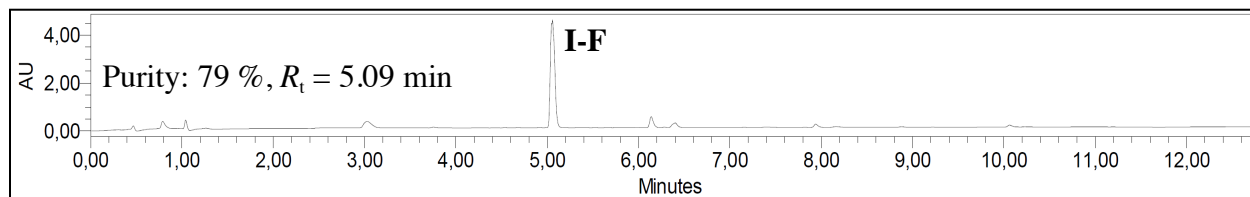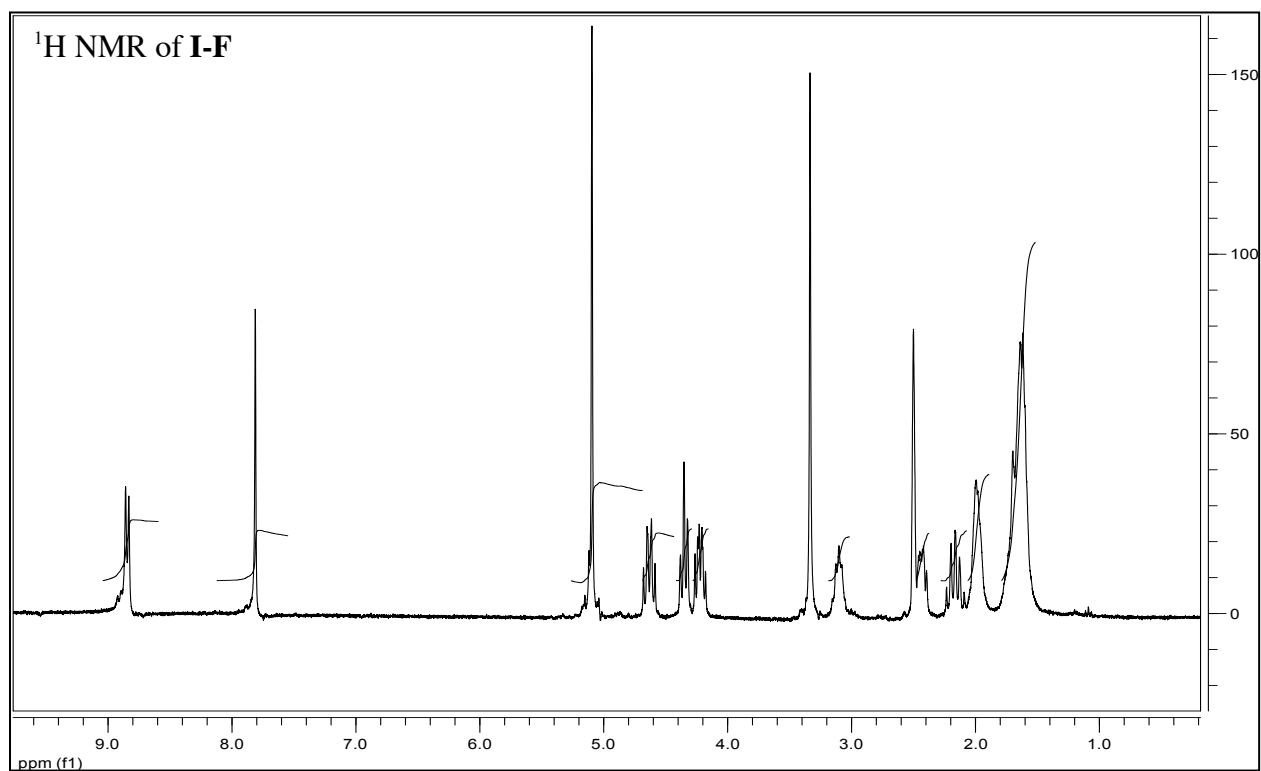

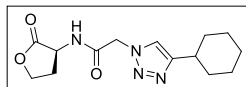

**Triazole I-G.**

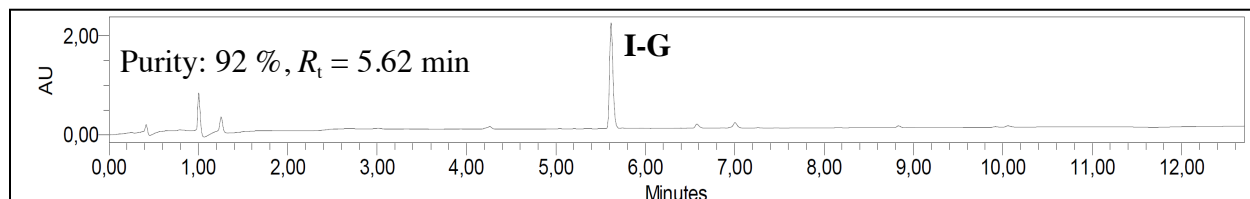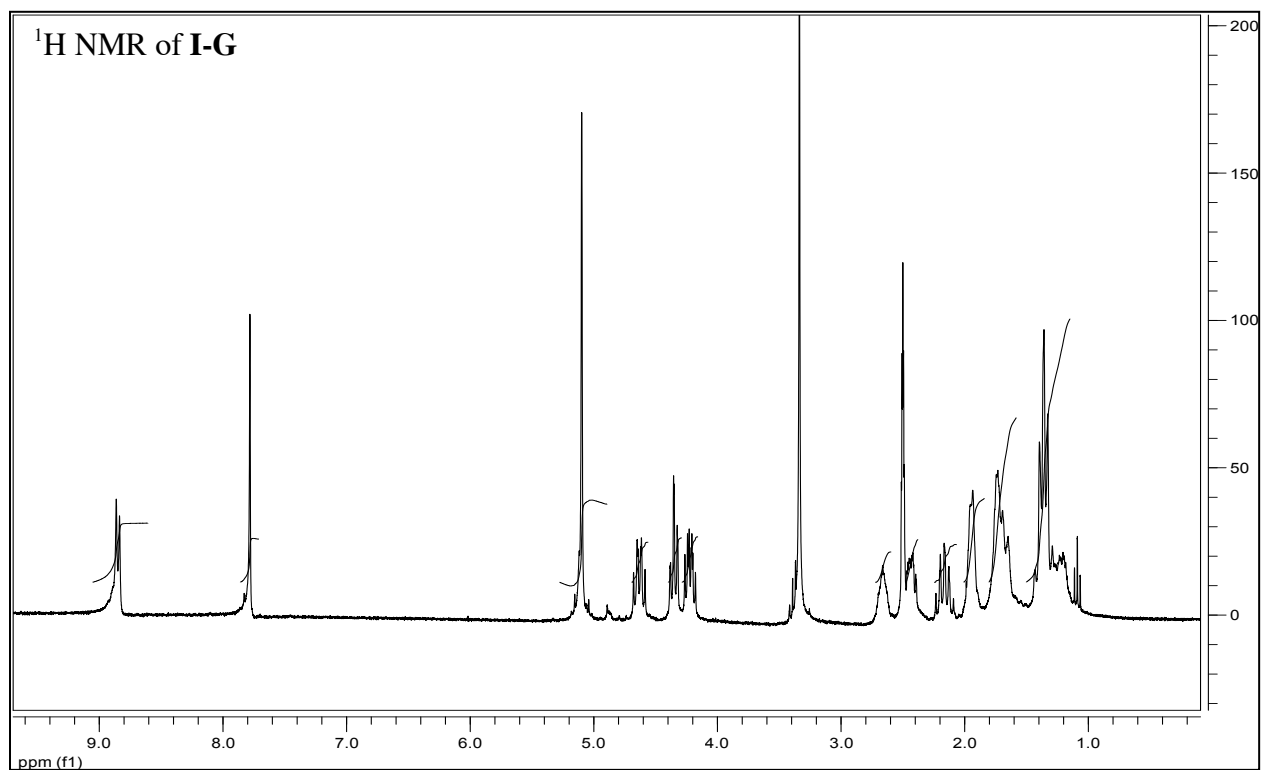

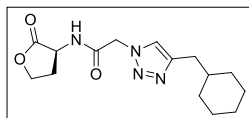

**Triazole I-H.**

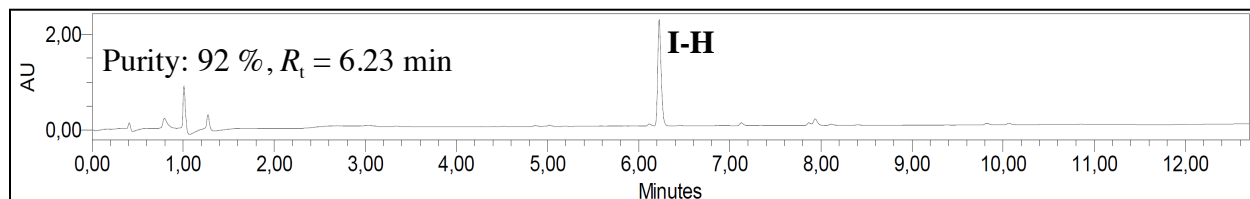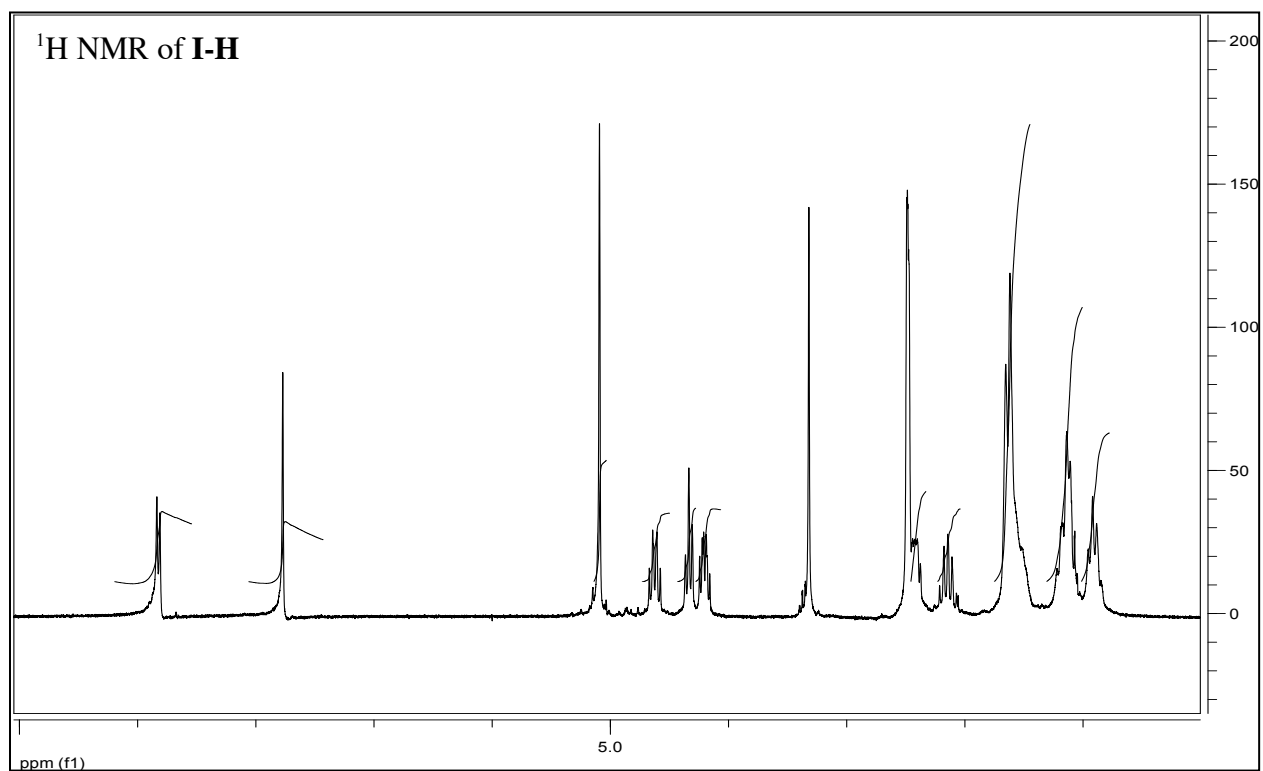

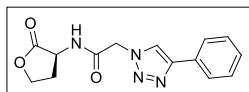

**Triazole I-I.**

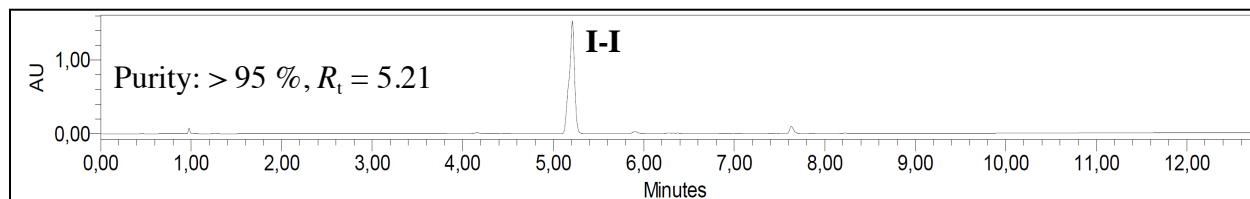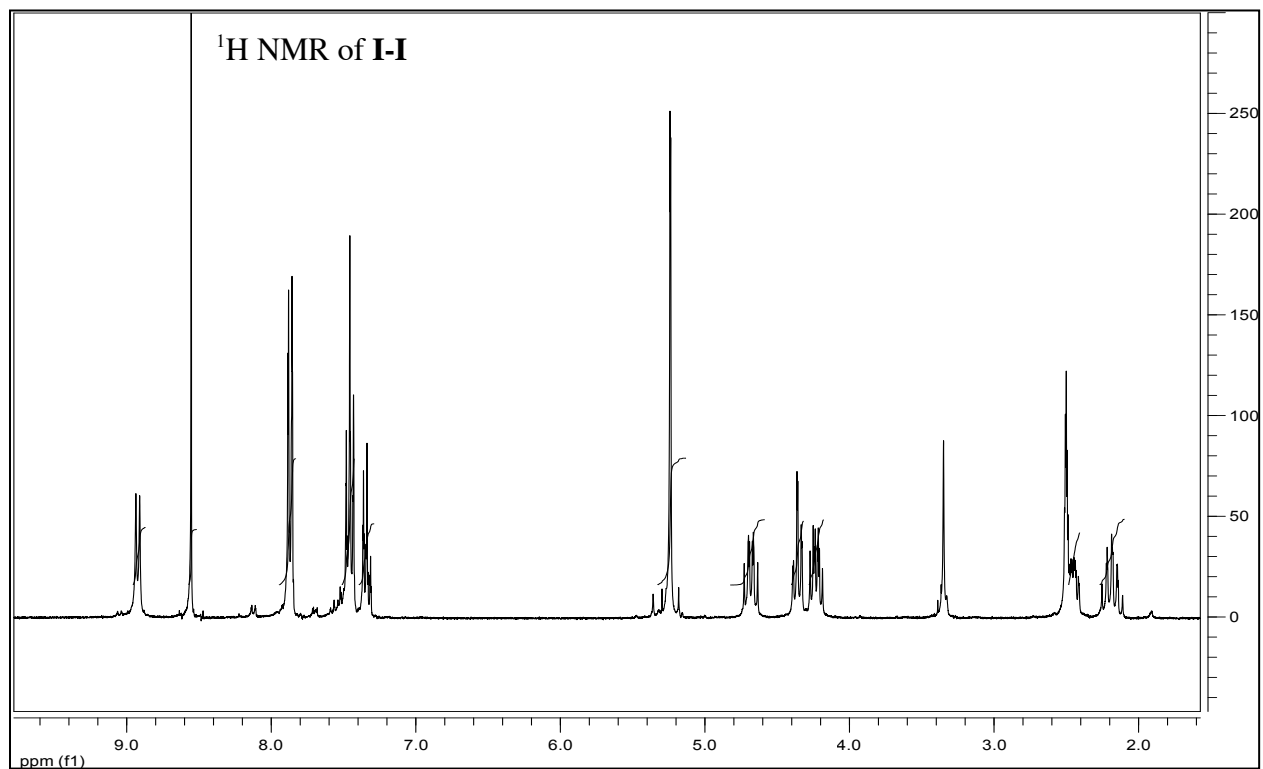

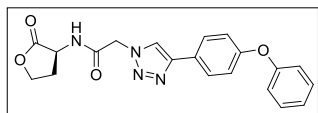

**Triazole I-J.**

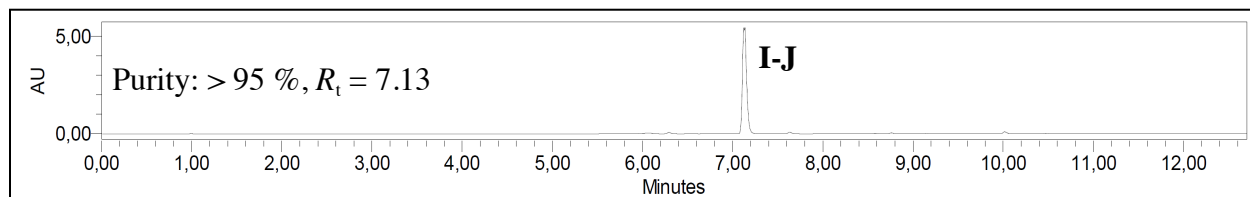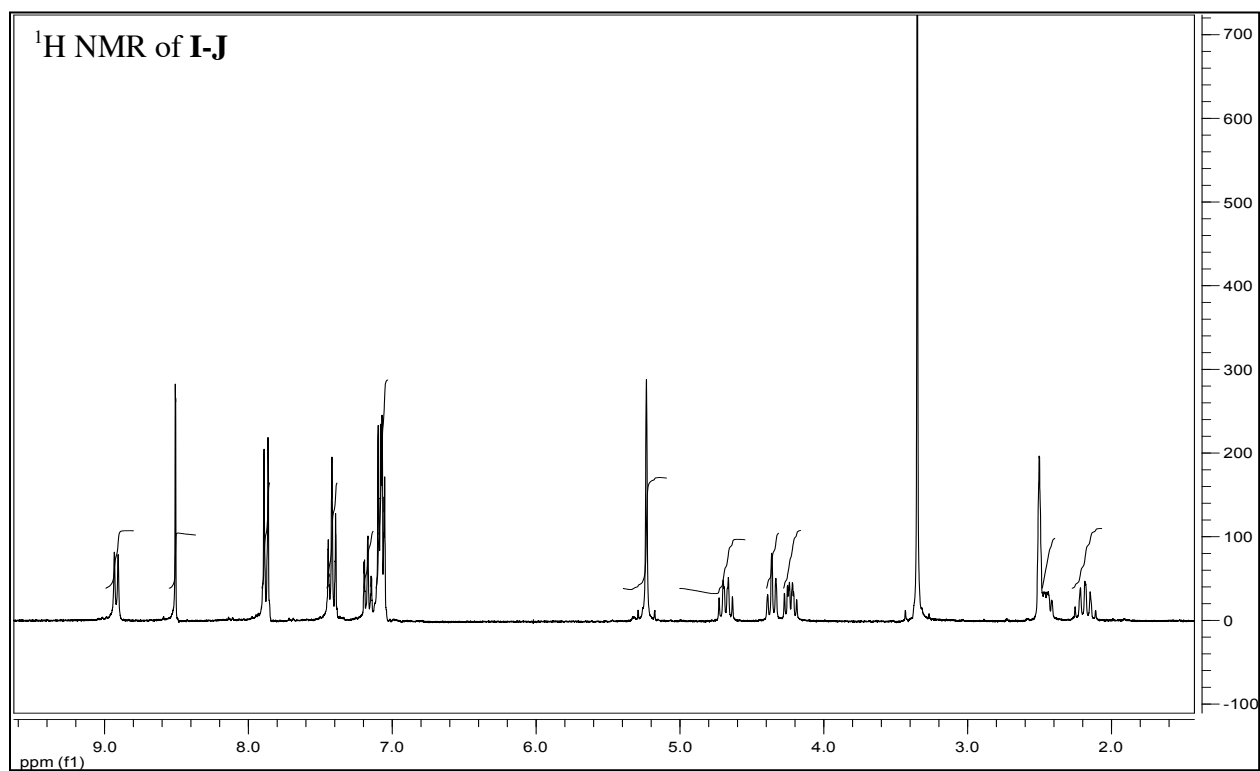

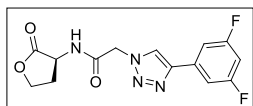

**Triazole I-K.**

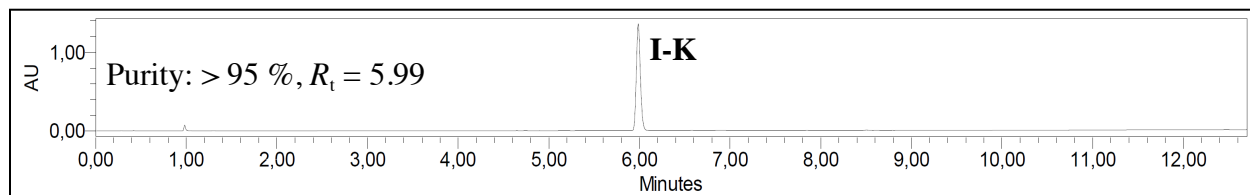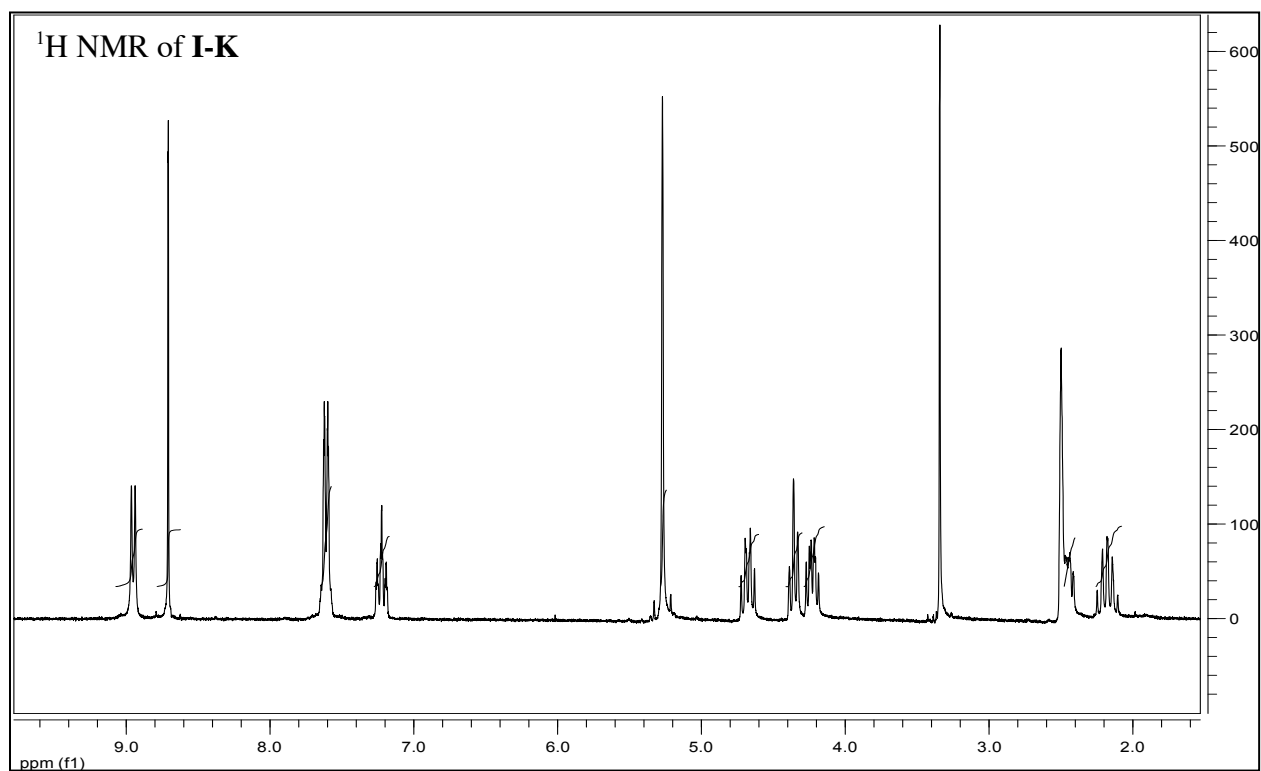

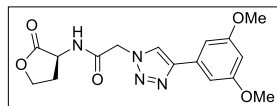

**Triazole I-L.**

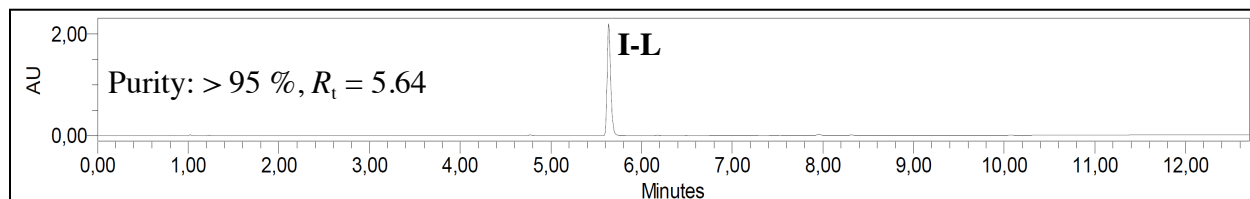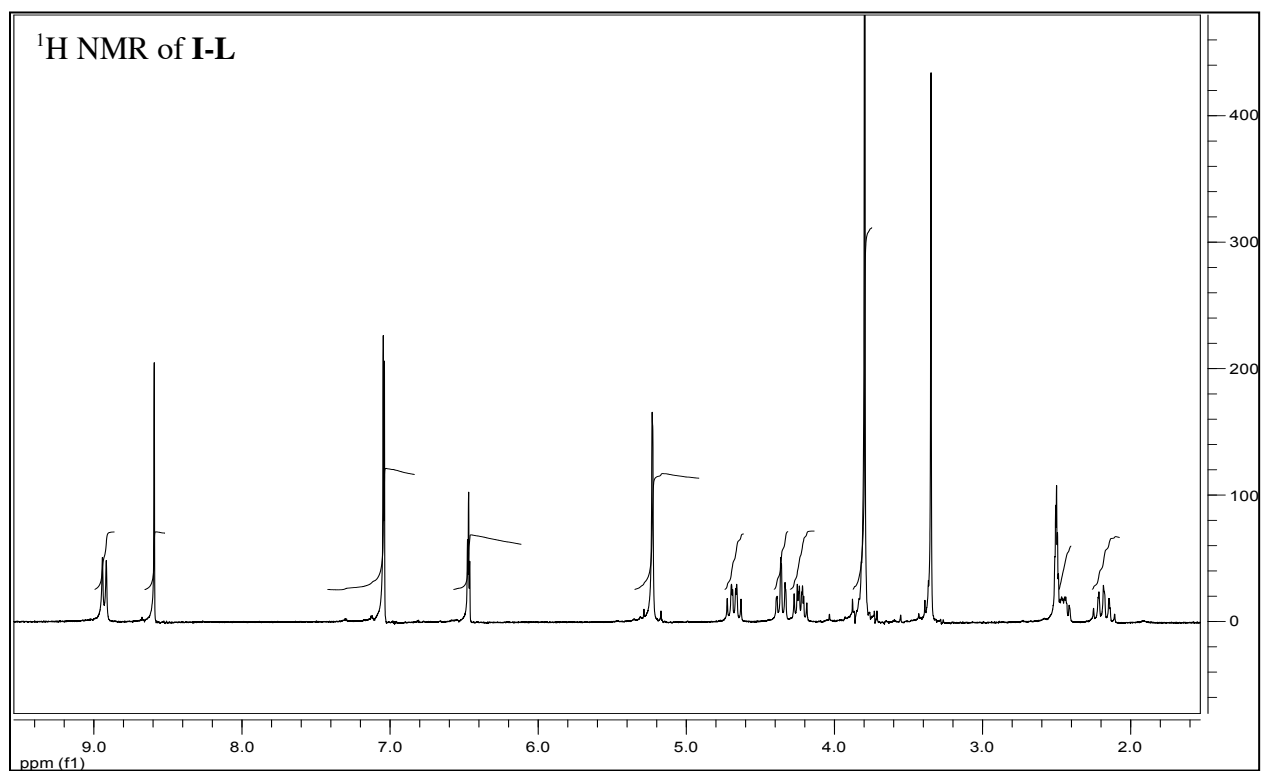

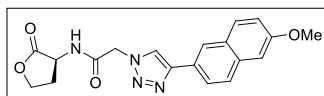

**Triazole I-M.**

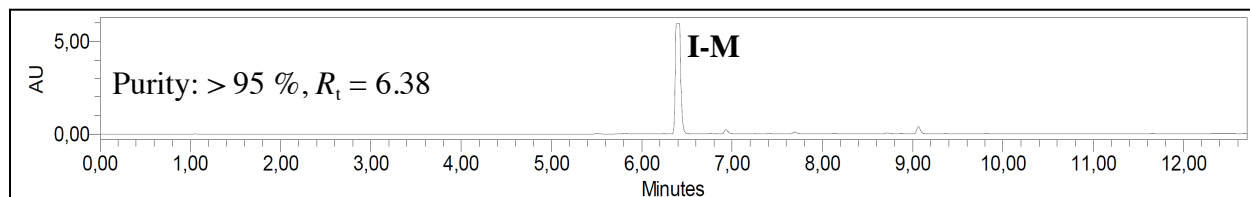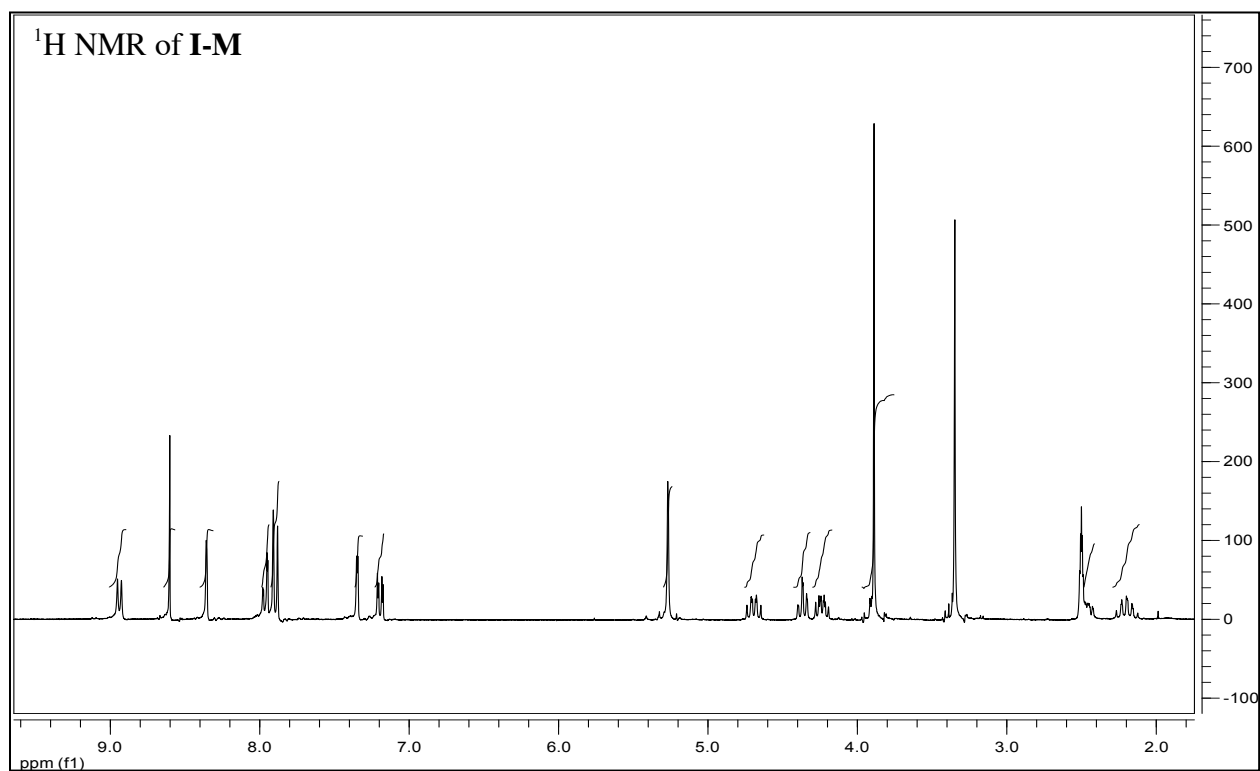



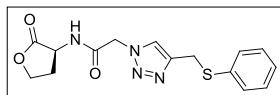

**Triazole I-N.**

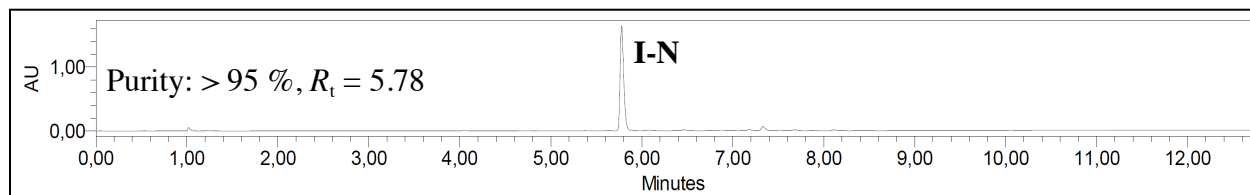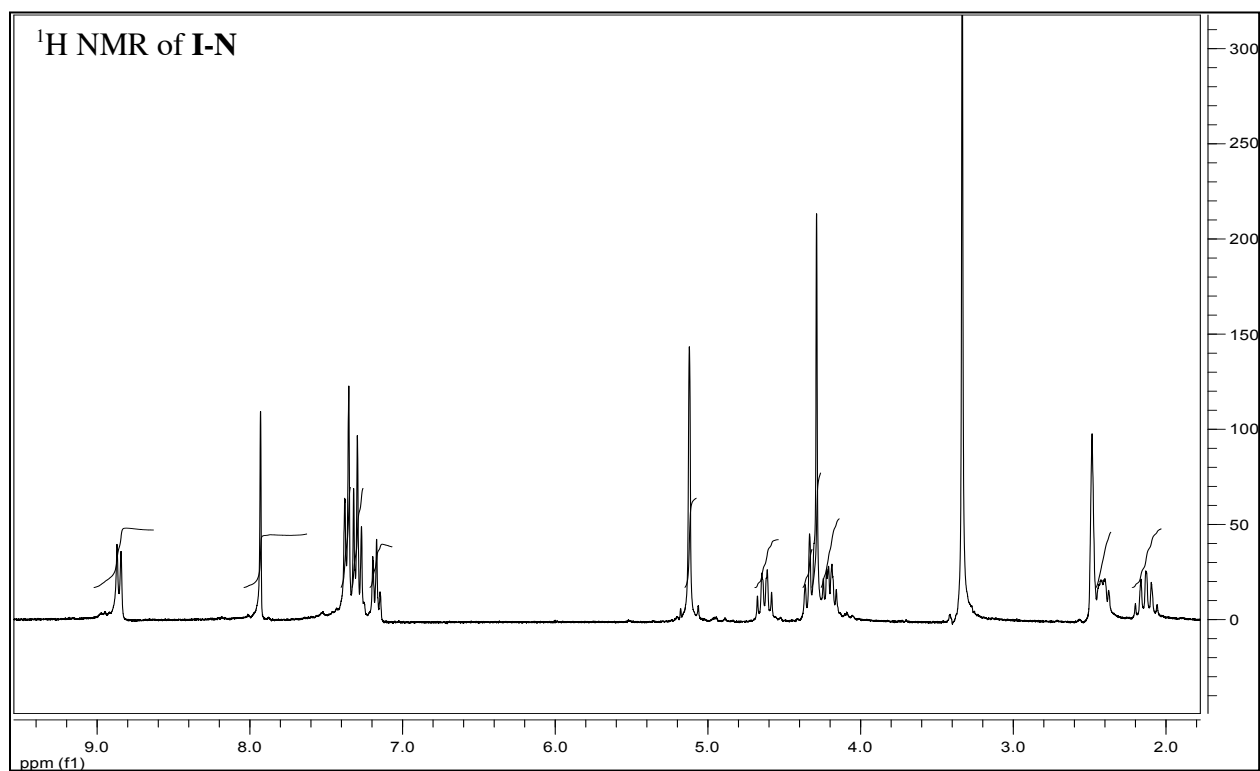

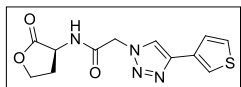

**Triazole I-O.**

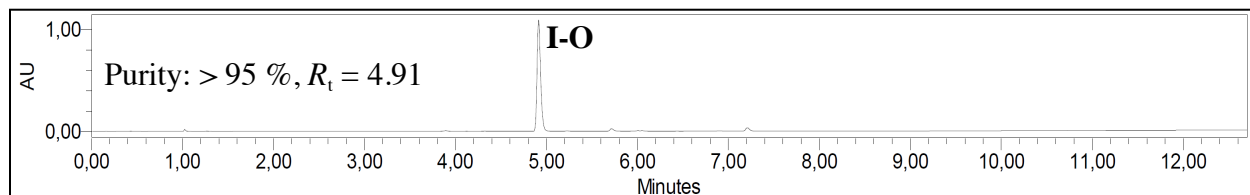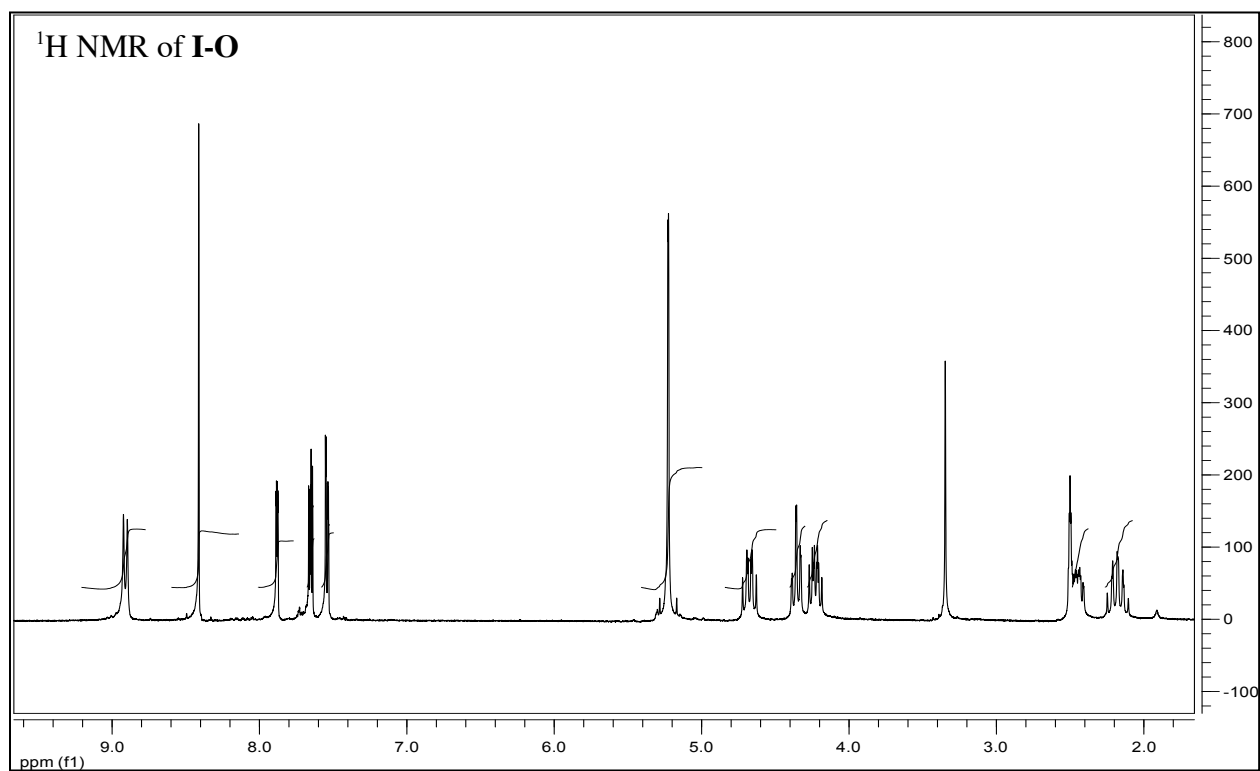

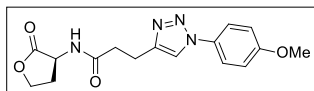

**Triazole II-A.**

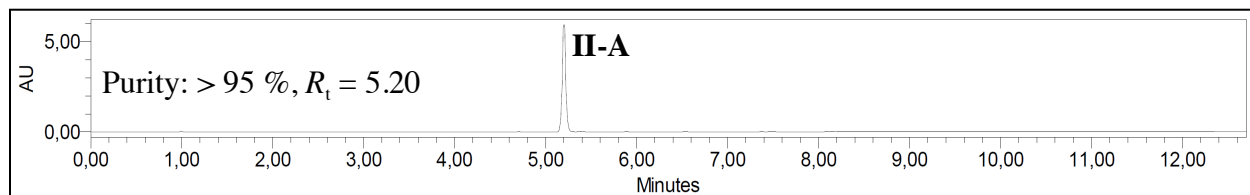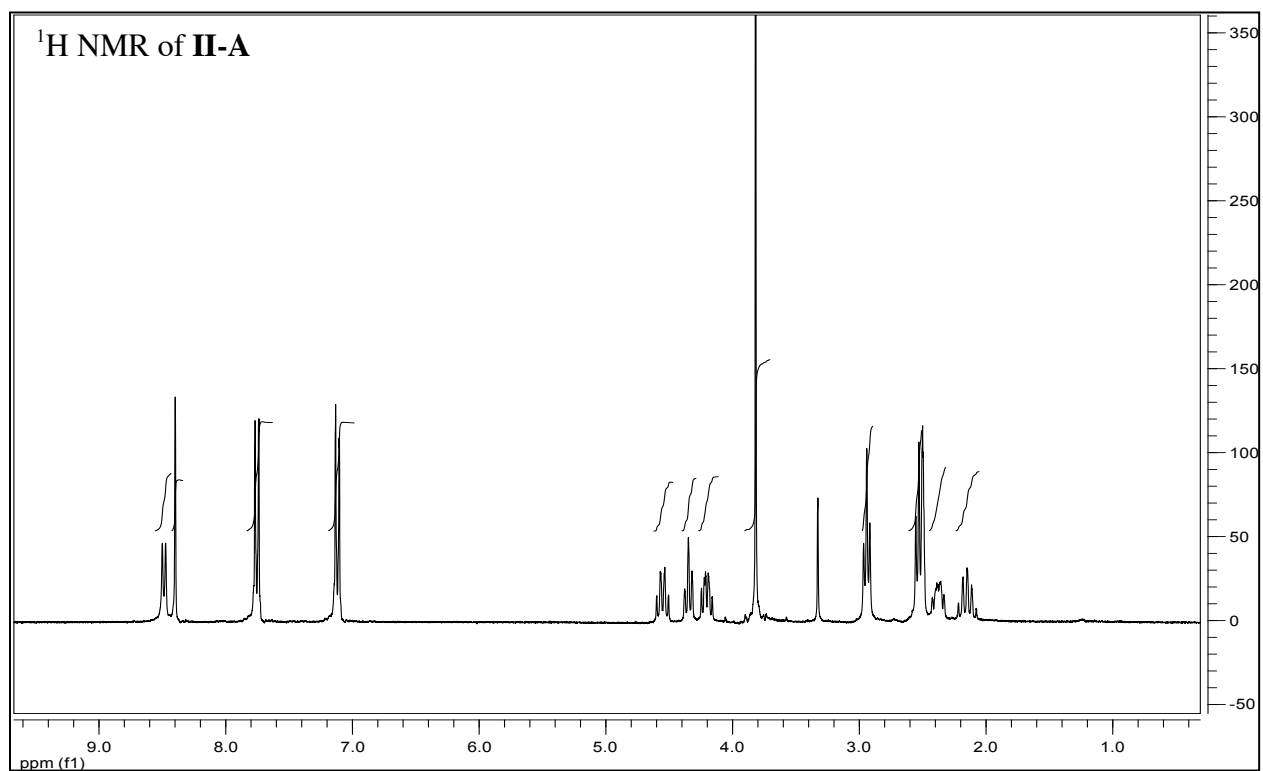

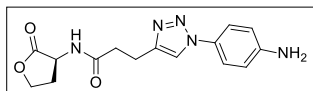

**Triazole II-B.**

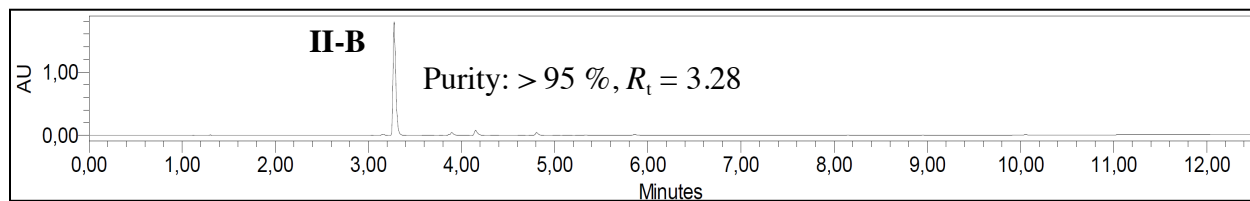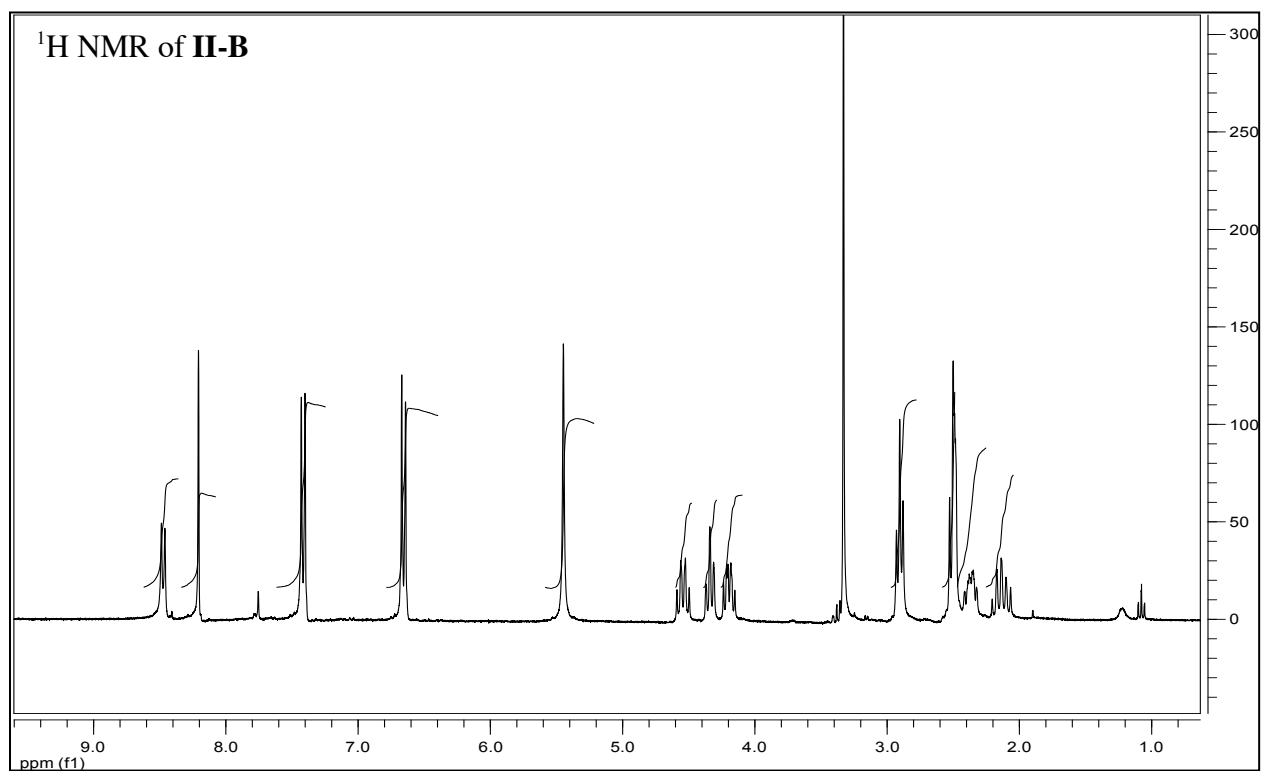

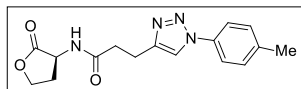

**Triazole II-C.**

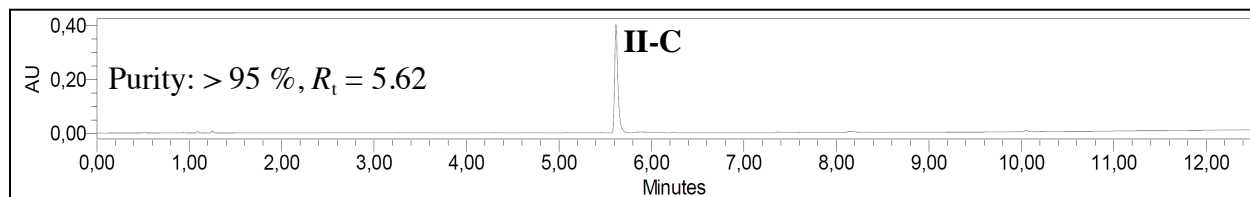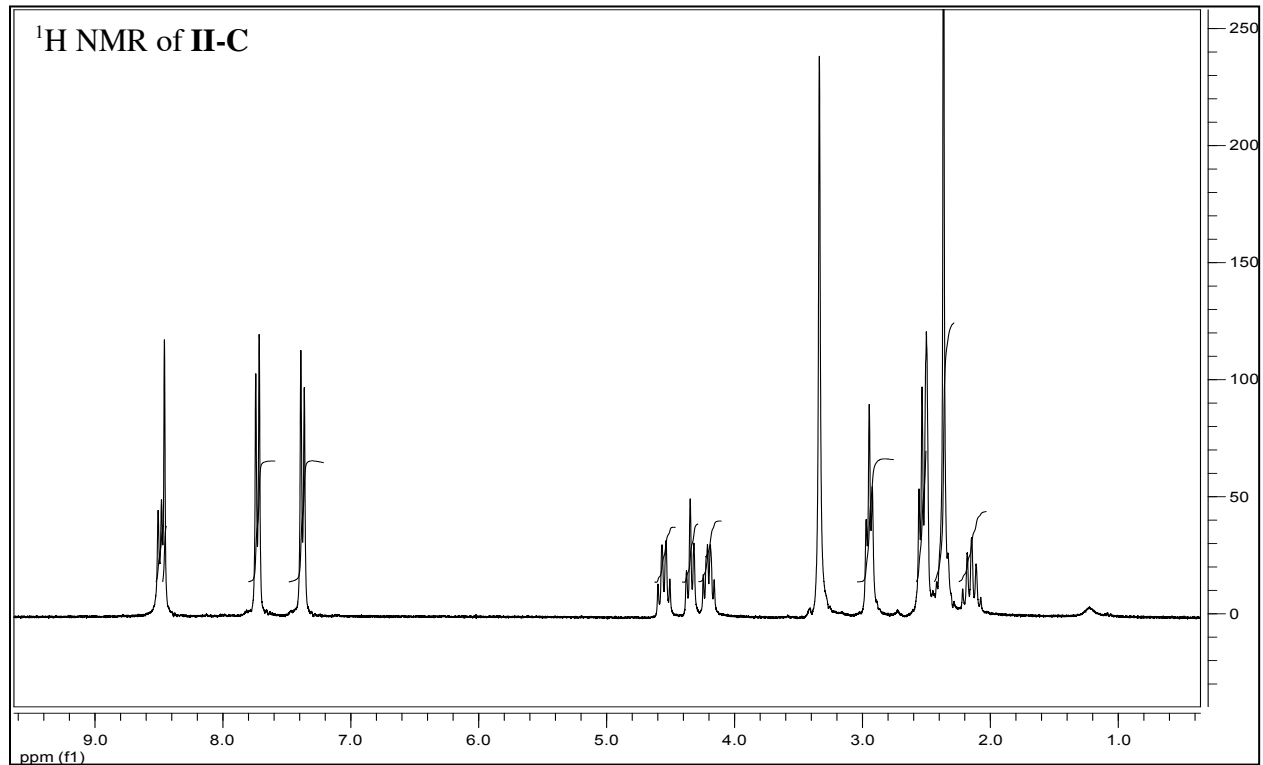

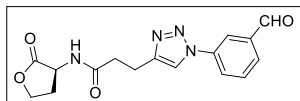

**Triazole II-D.**

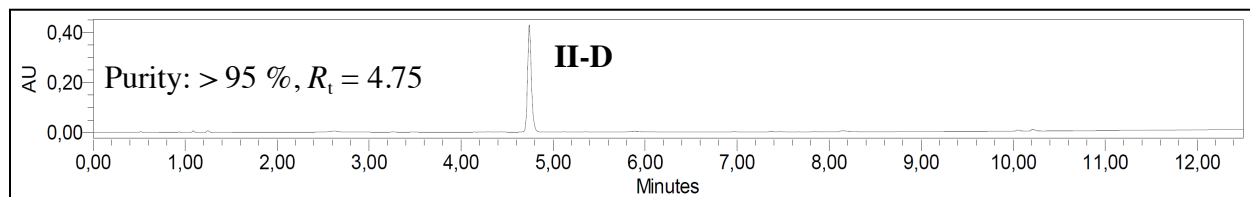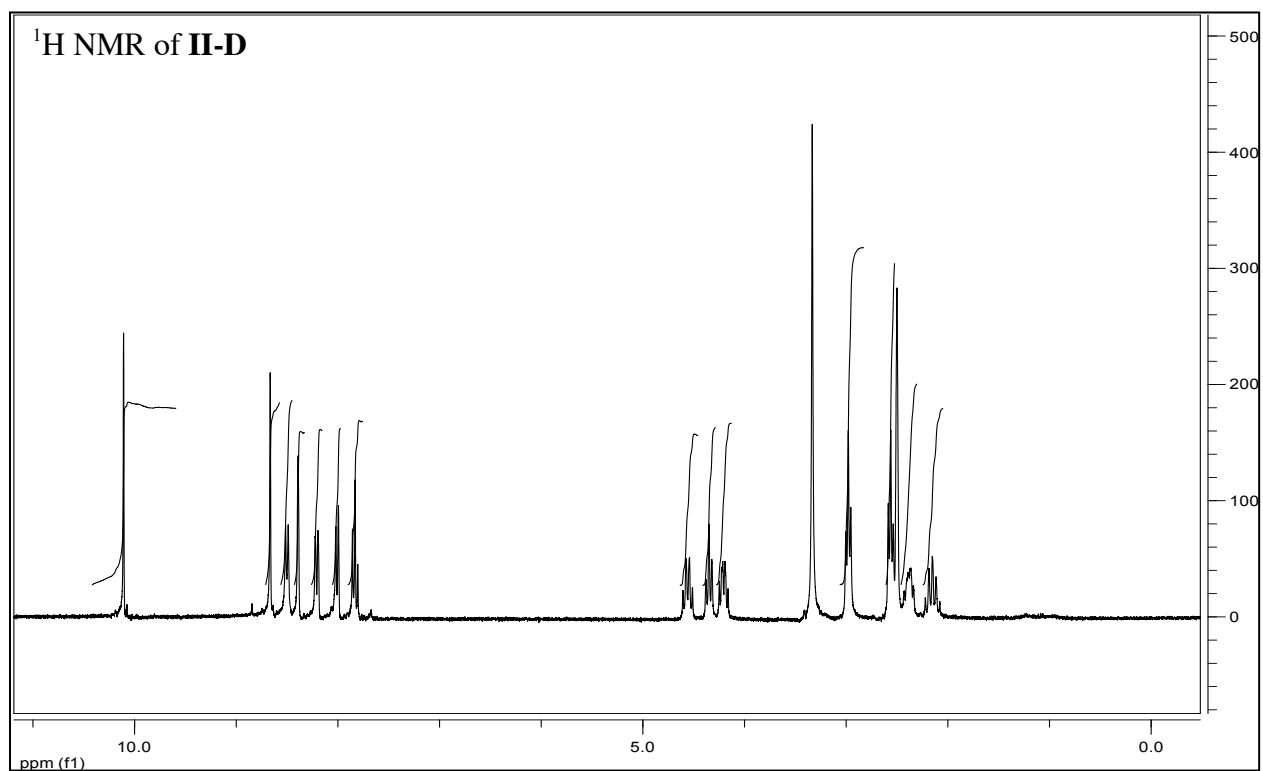

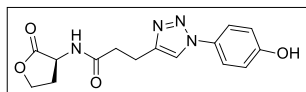

**Triazole II-E.**

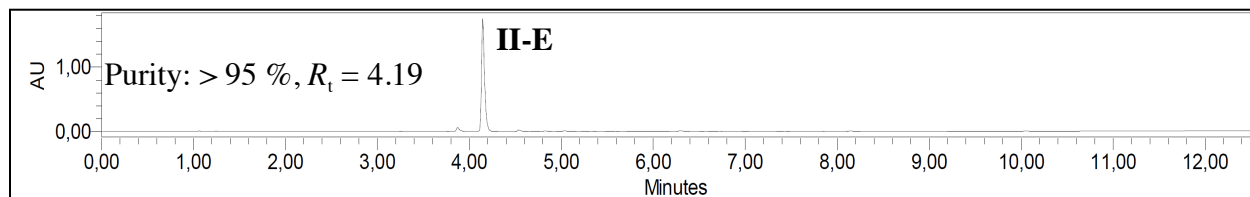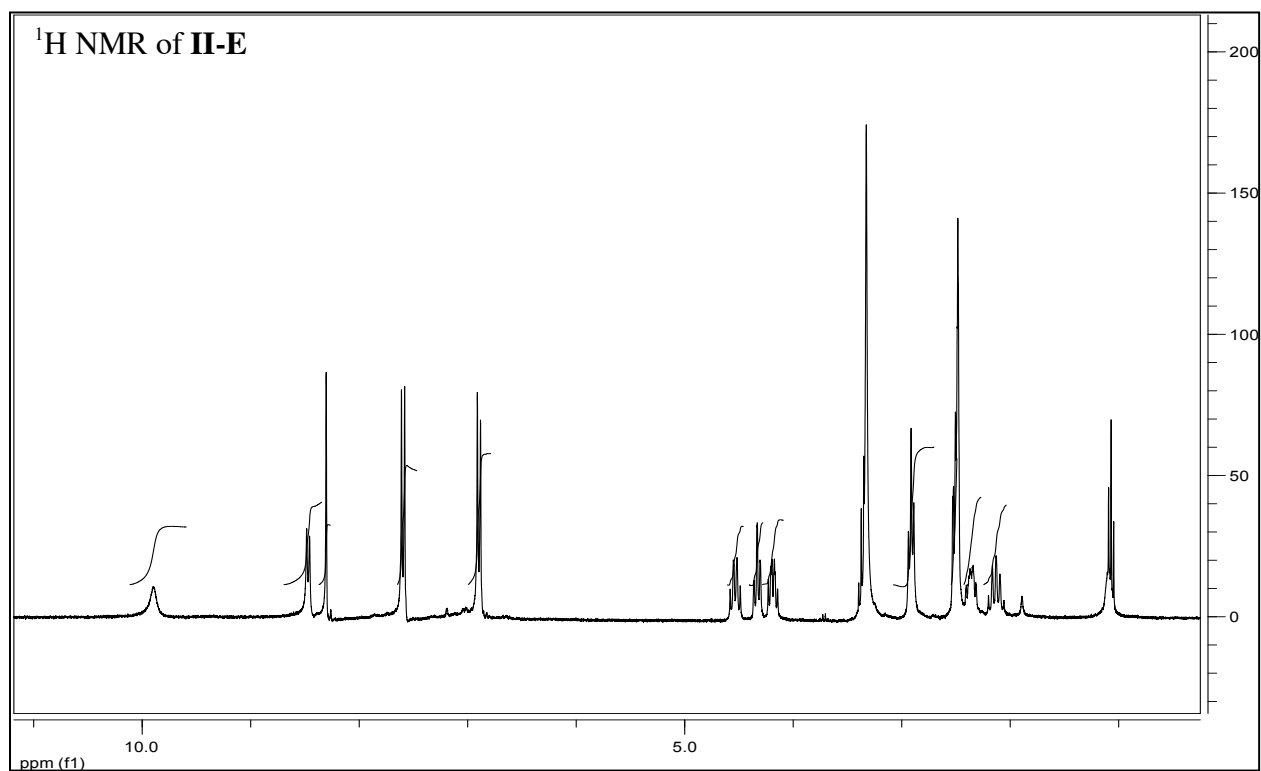

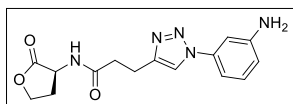

**Triazole II-F.**

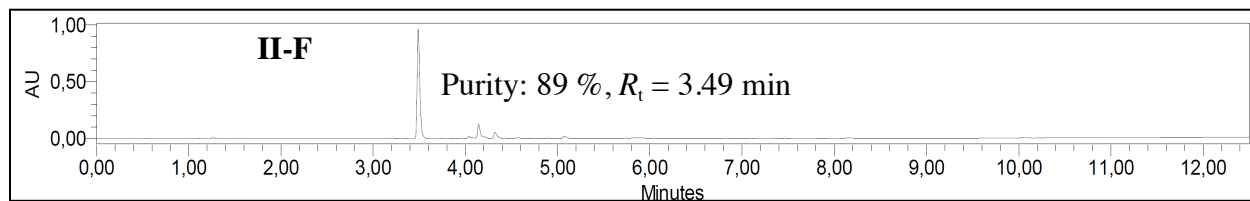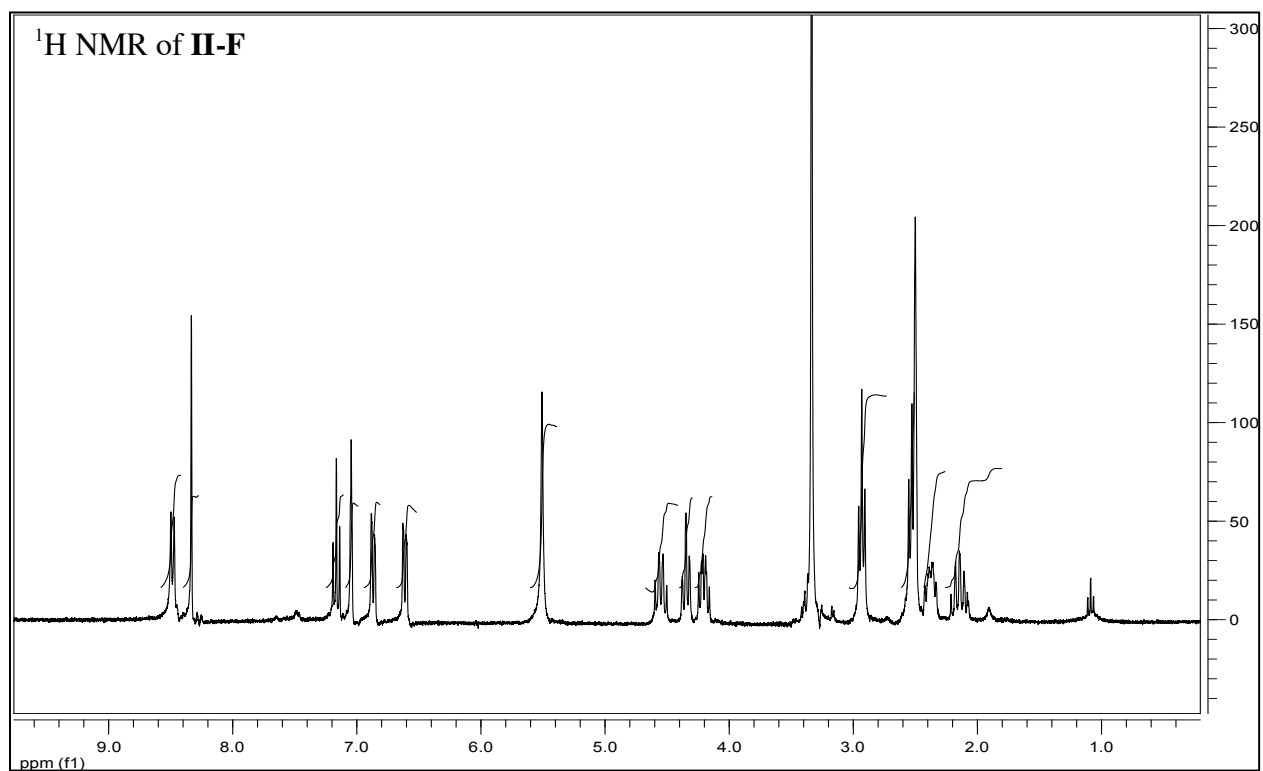



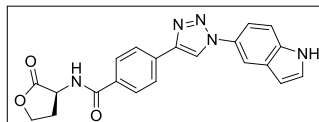

**Triazole III-A.**

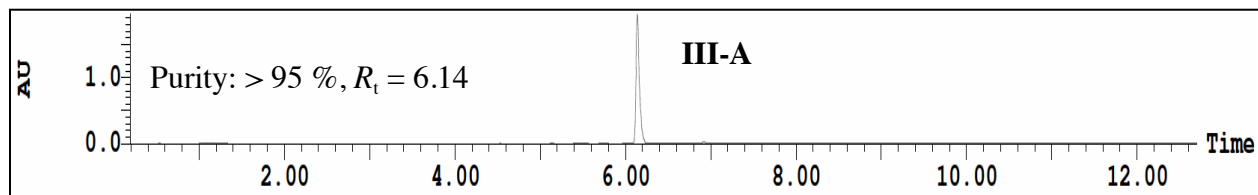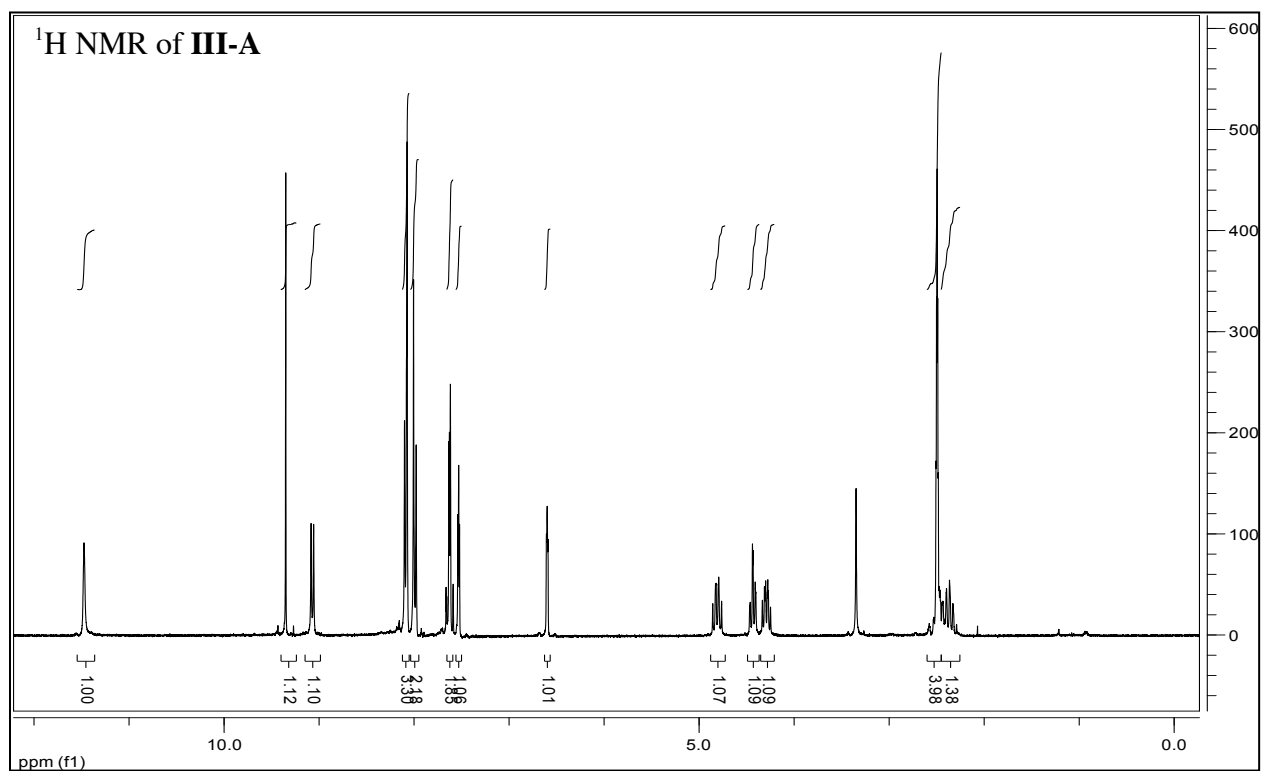

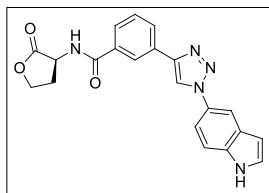

**Triazole III-B.**

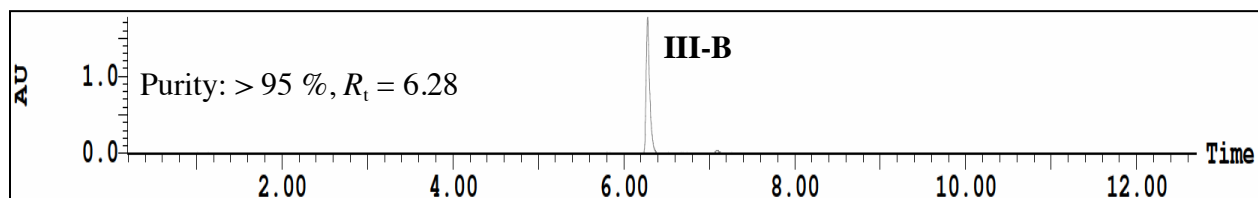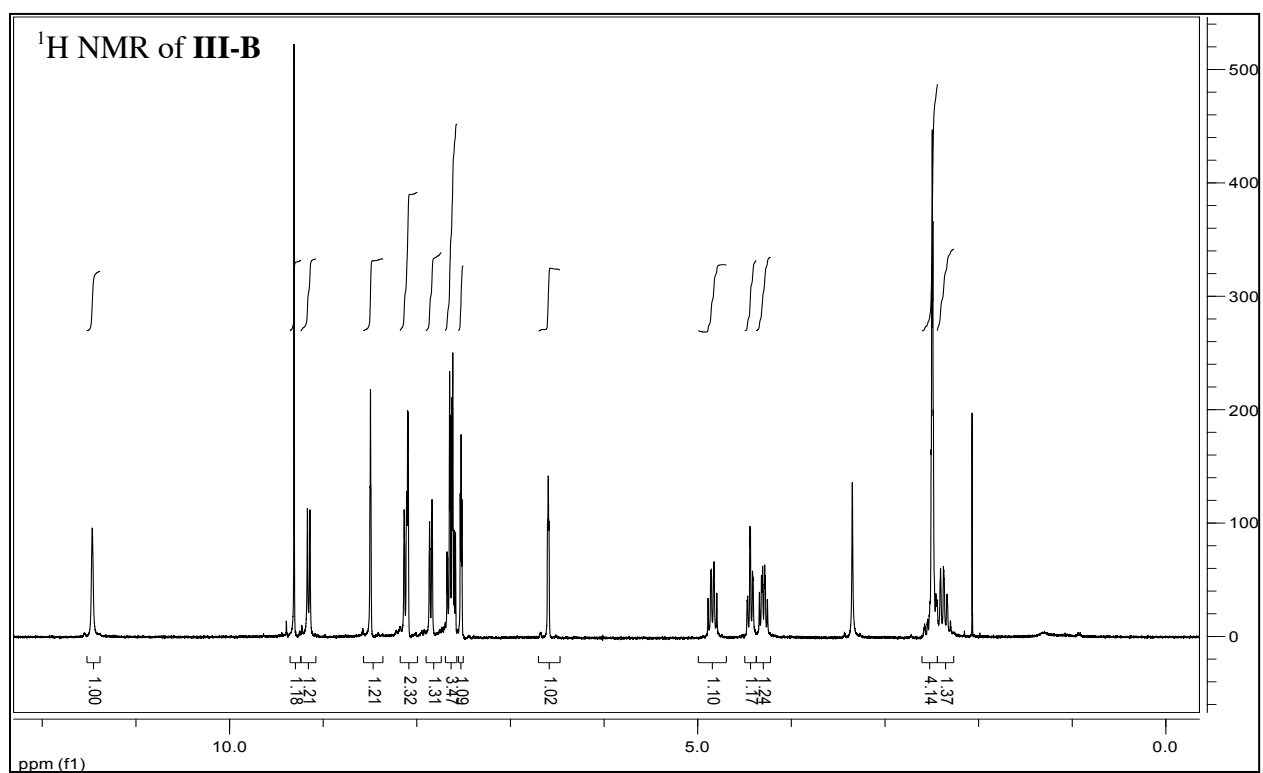

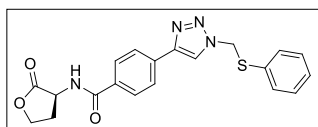

**Triazole III-C.**

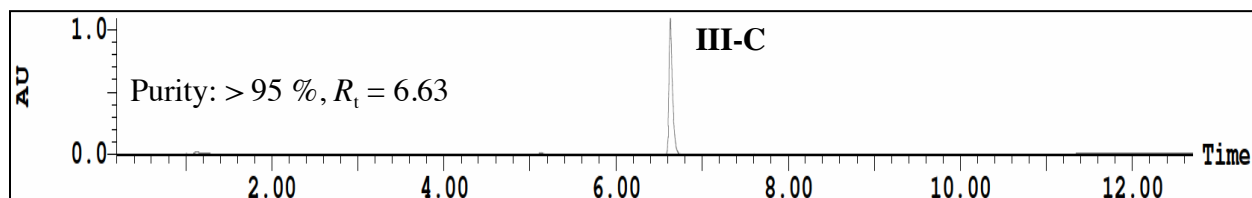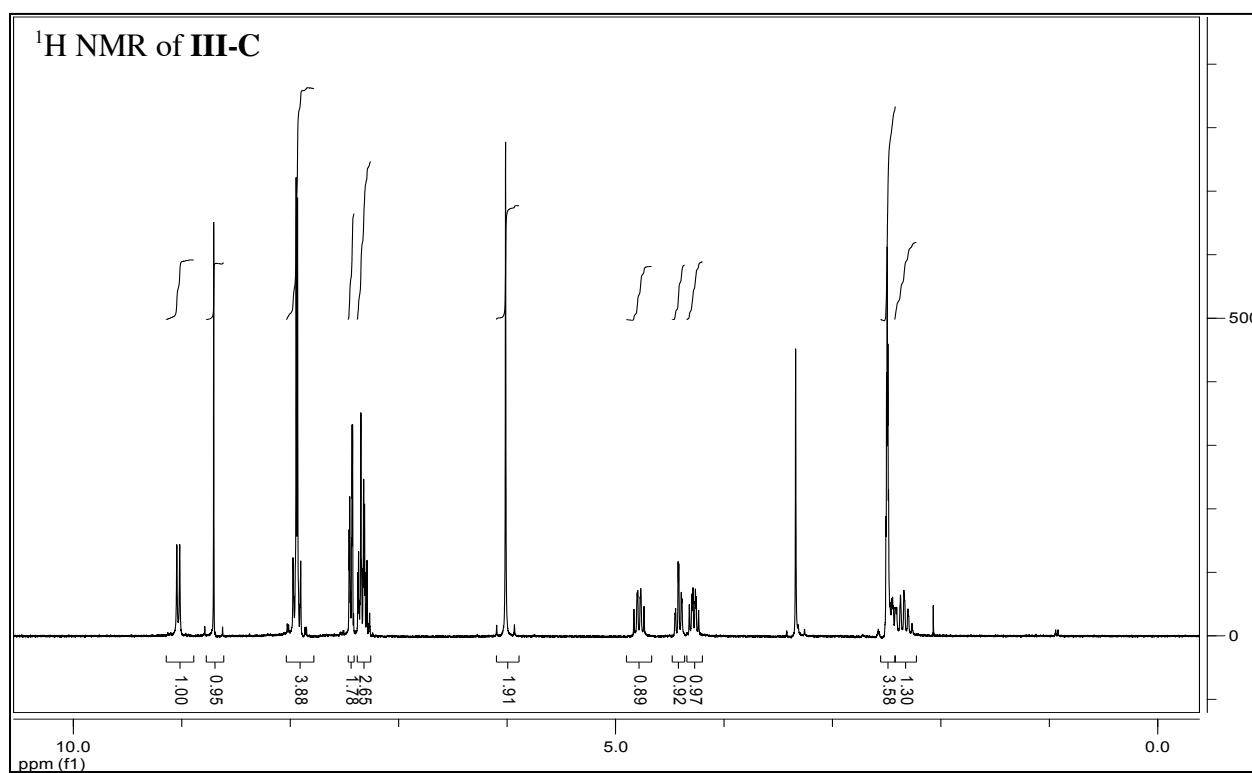

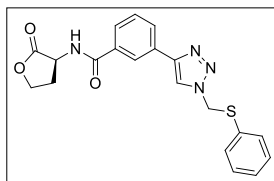

**Triazole III-D.**

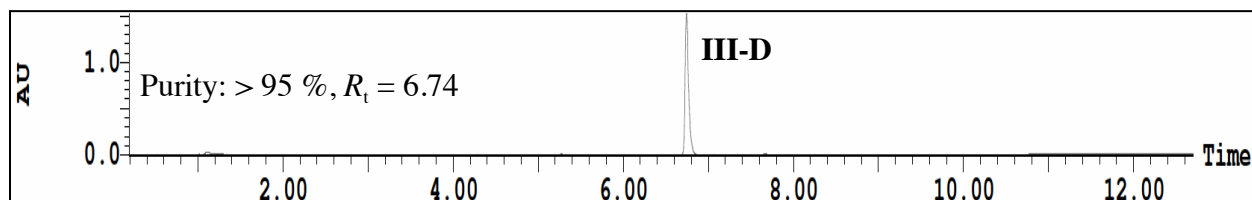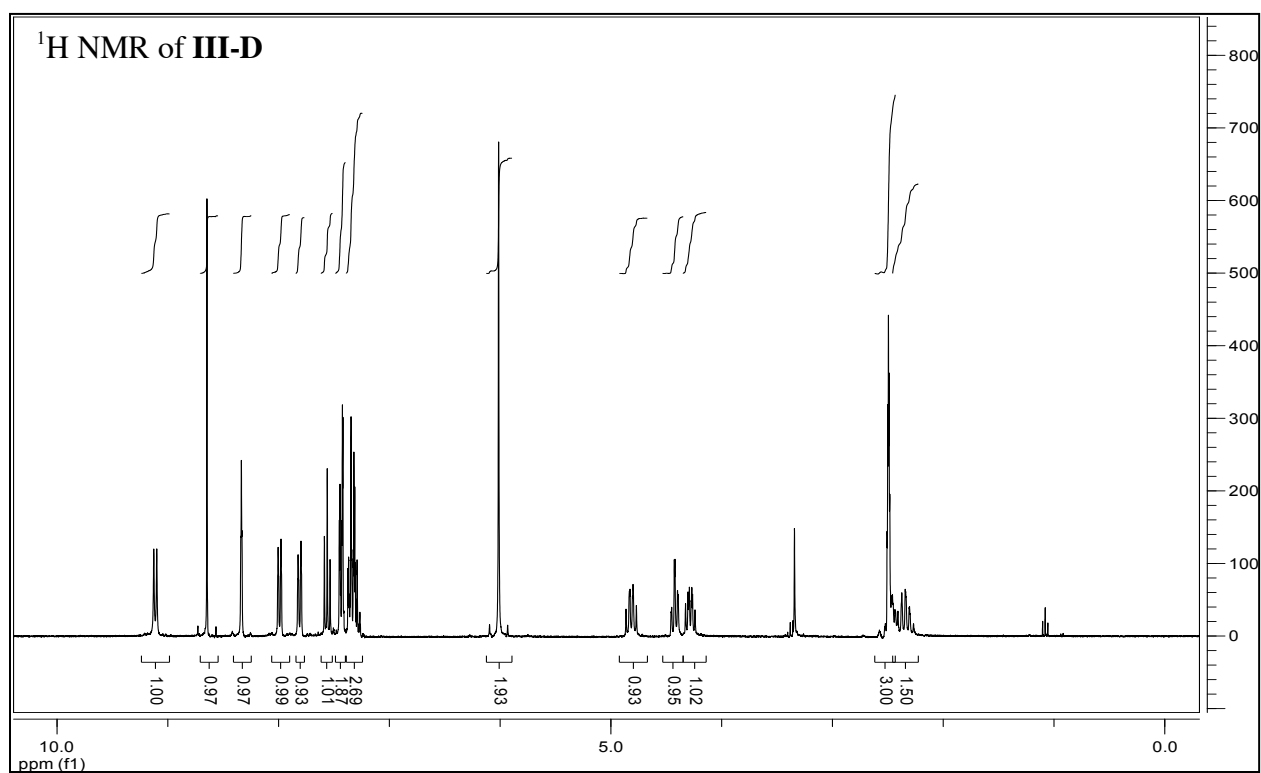

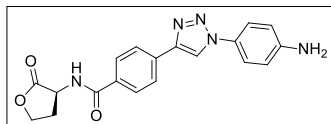

**Triazole III-E.**

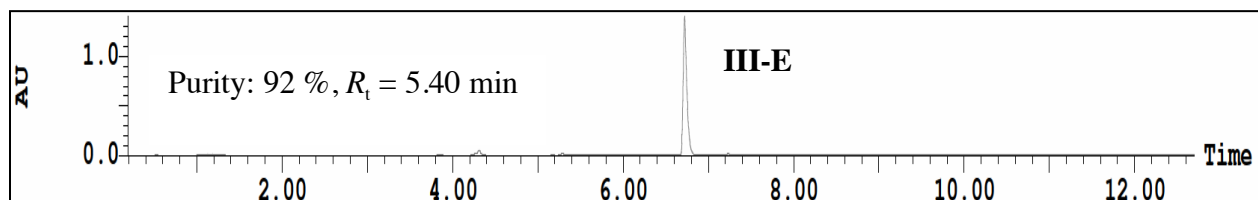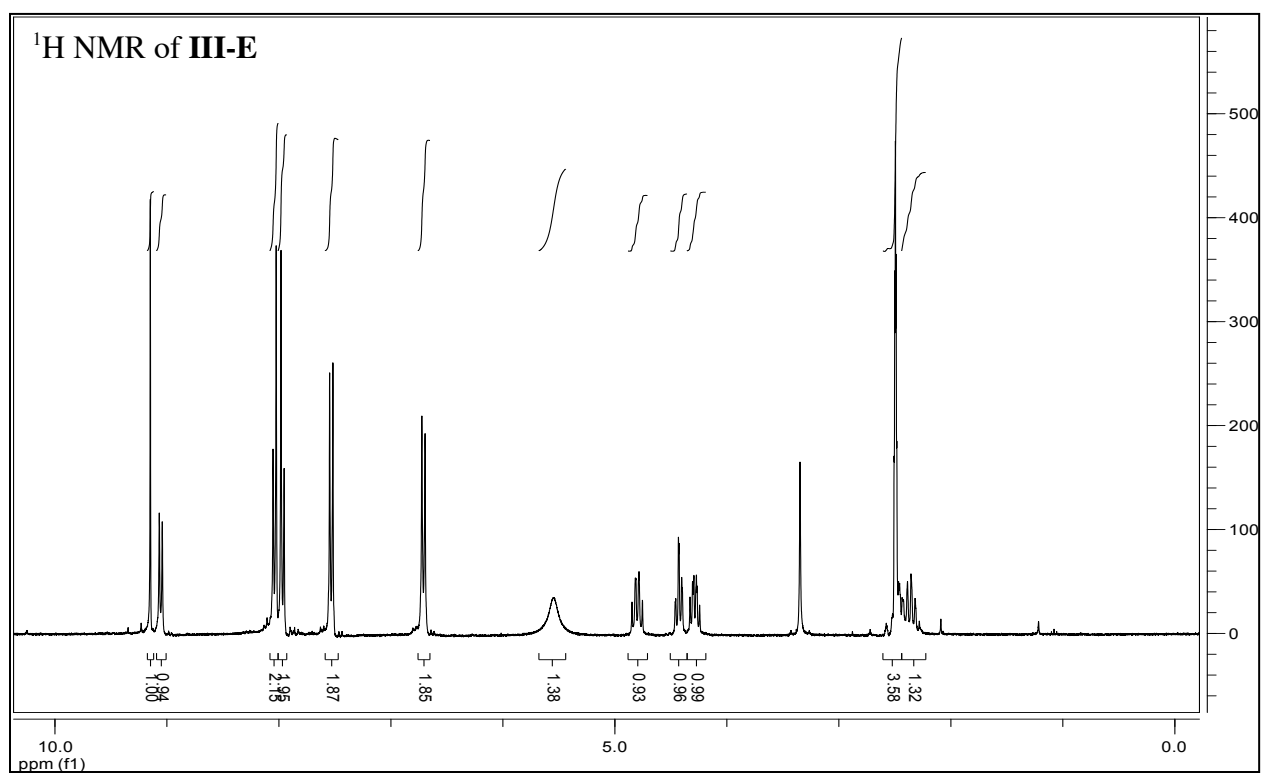

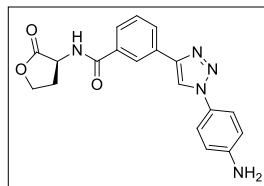

**Triazole III-F.**

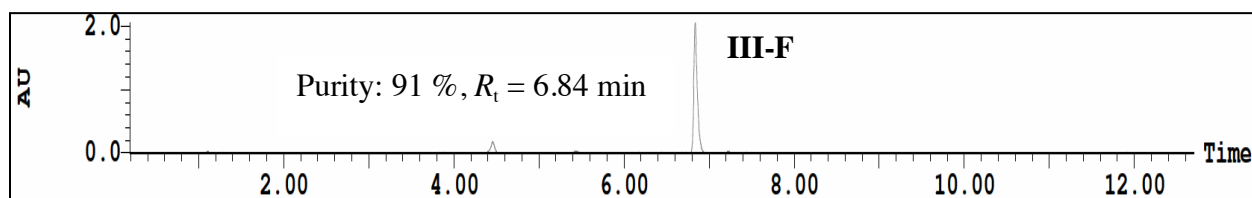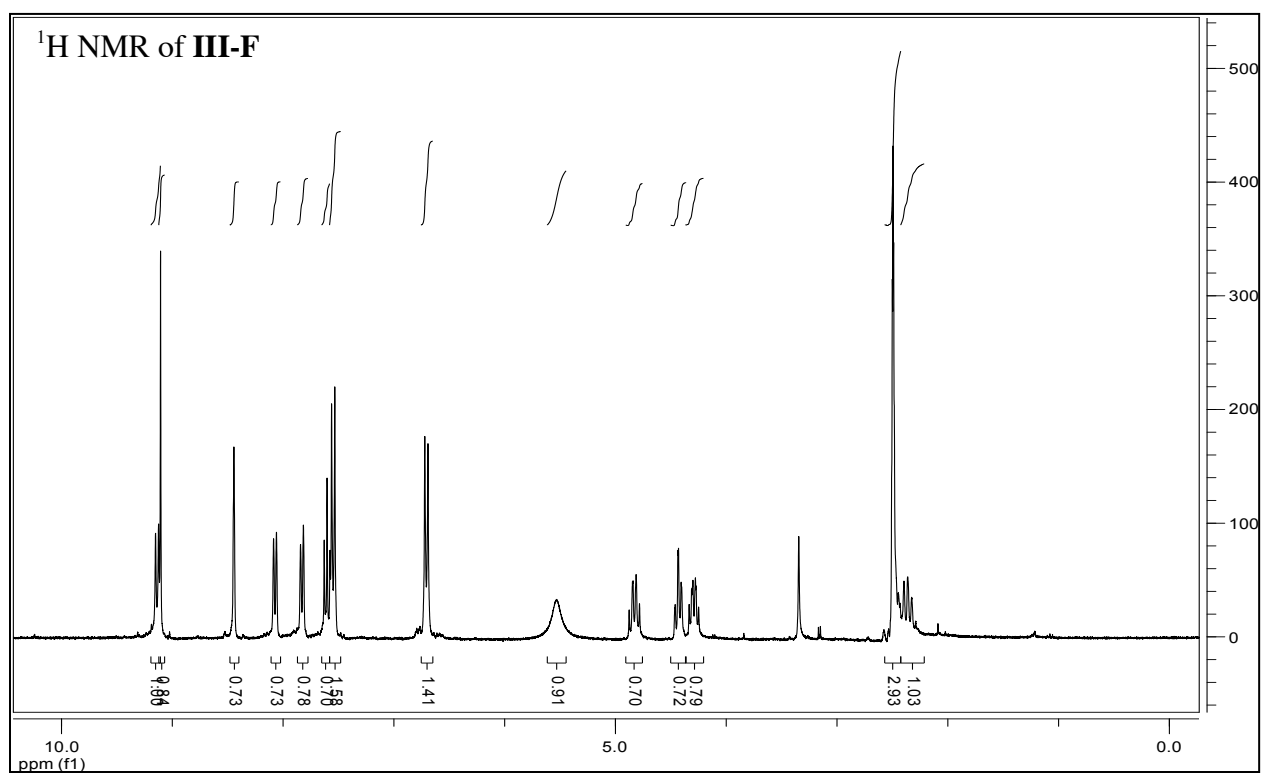

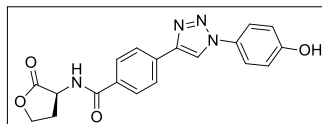

**Triazole III-G.**

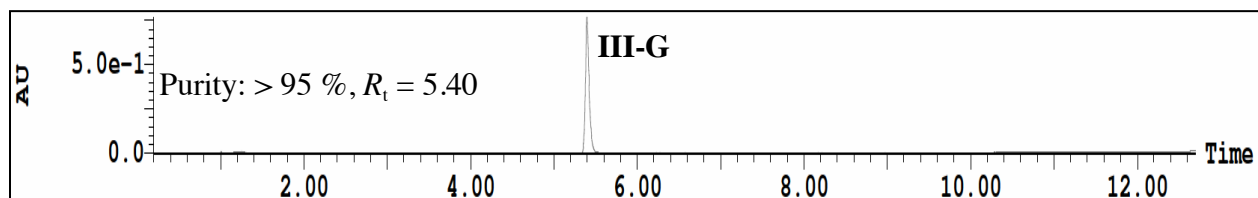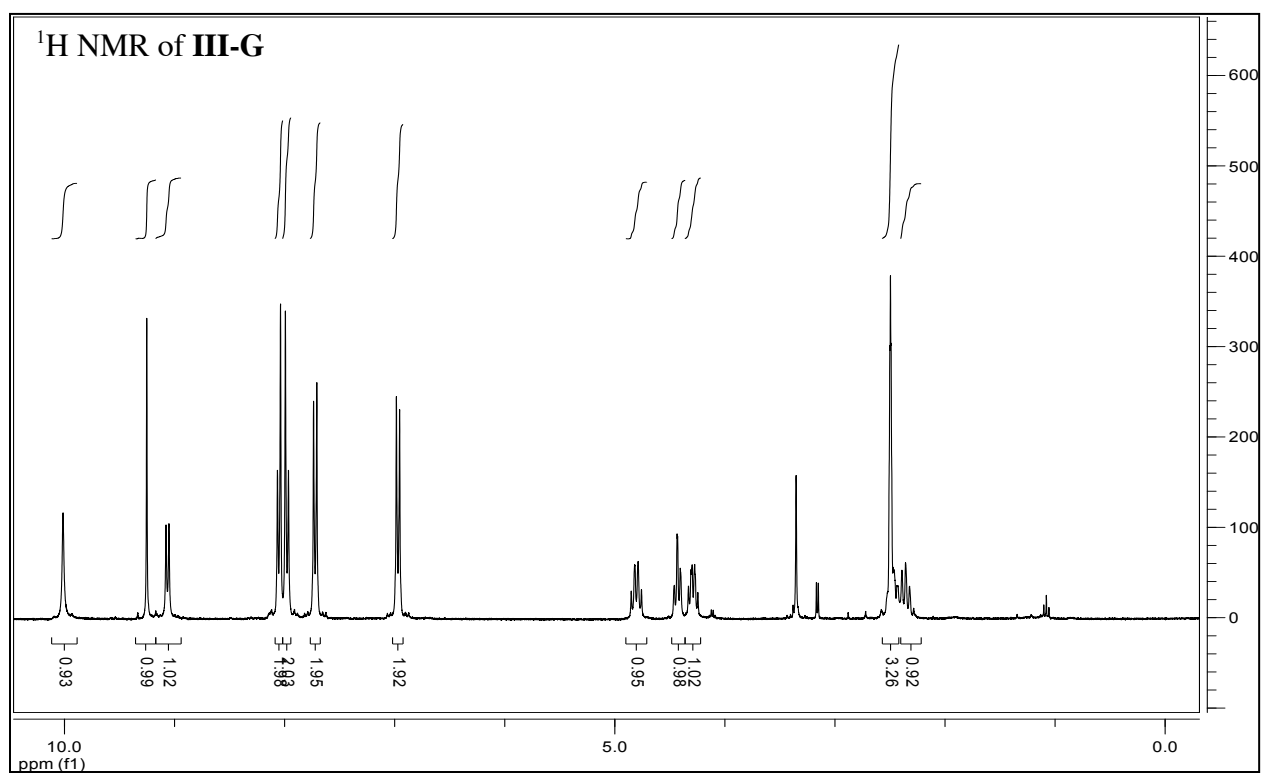

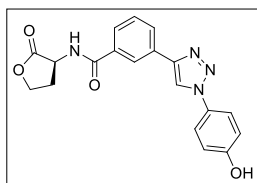

**Triazole III-H.**

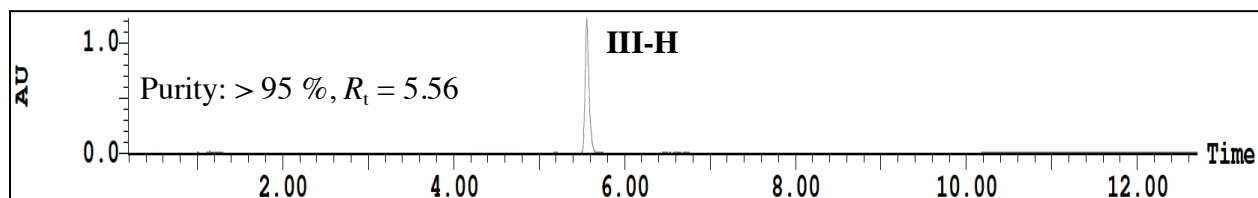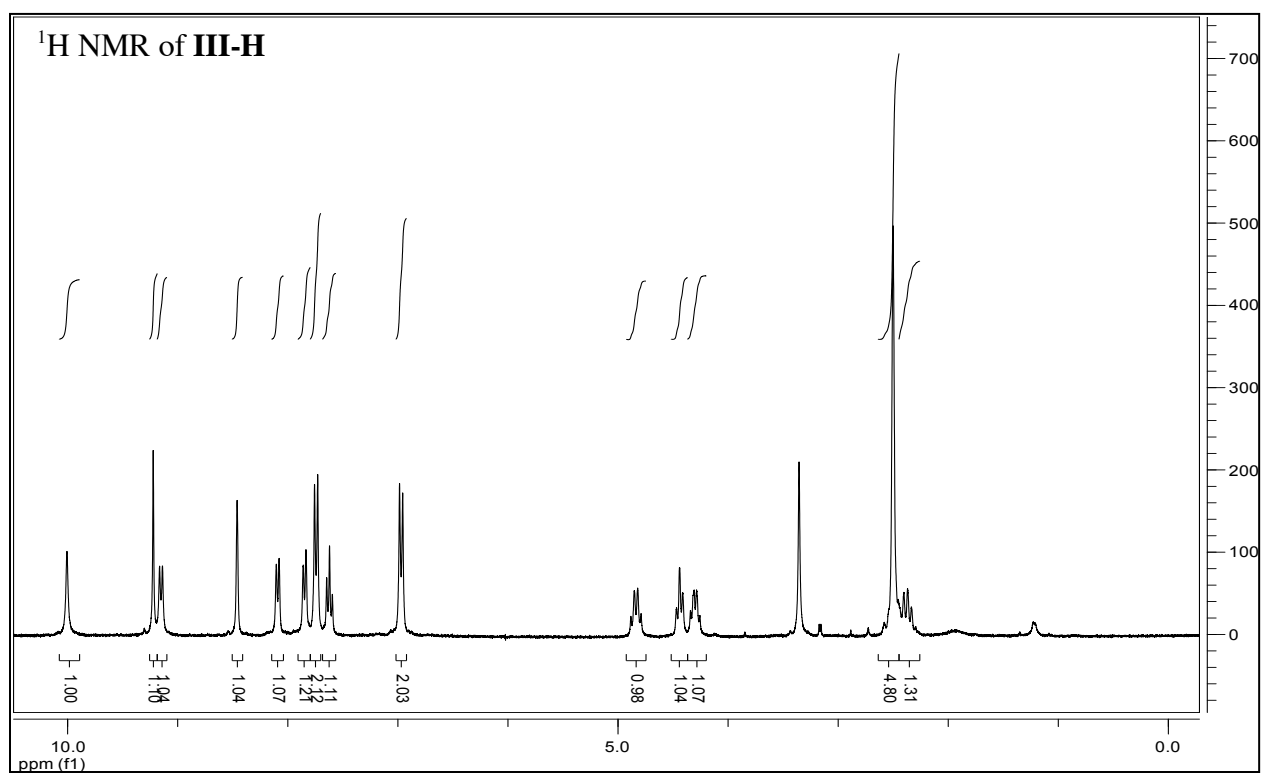



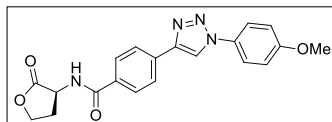

**Triazole III-I.**

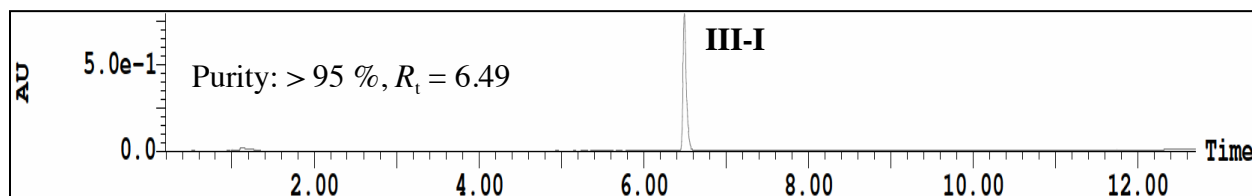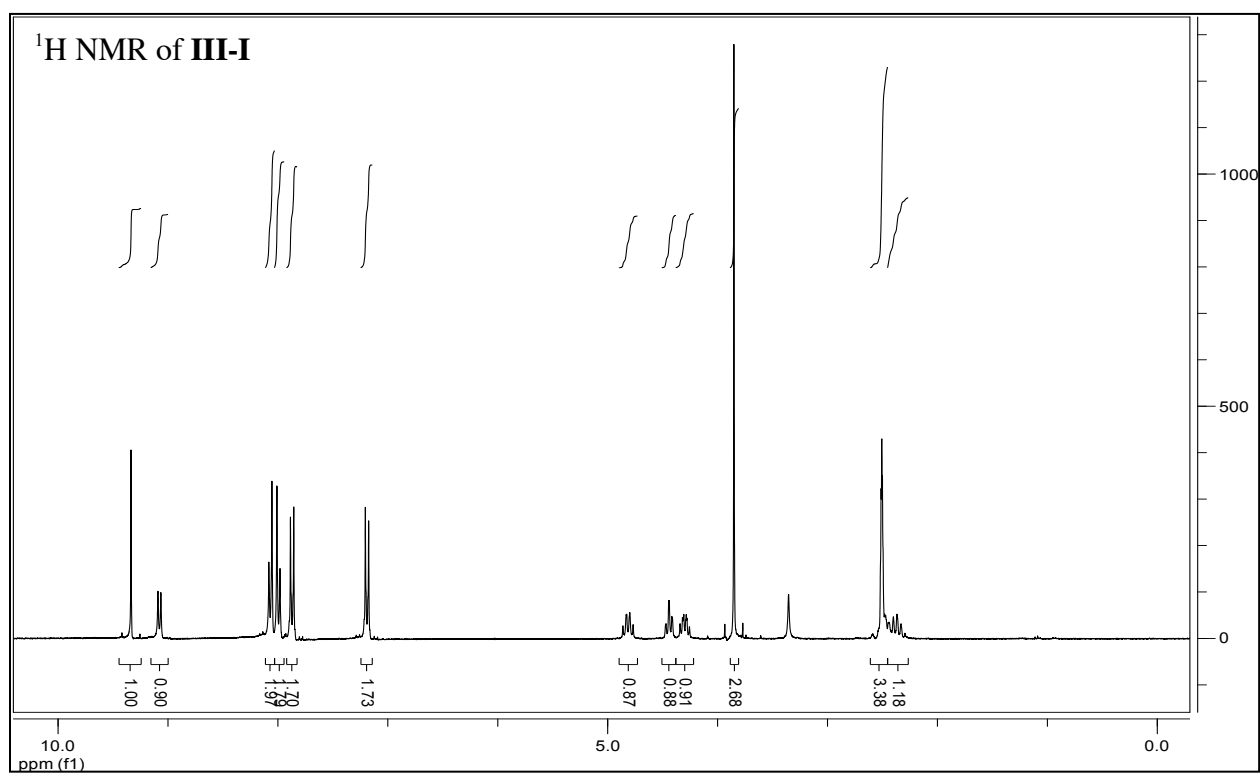

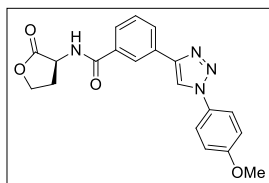

Triazole III-J.

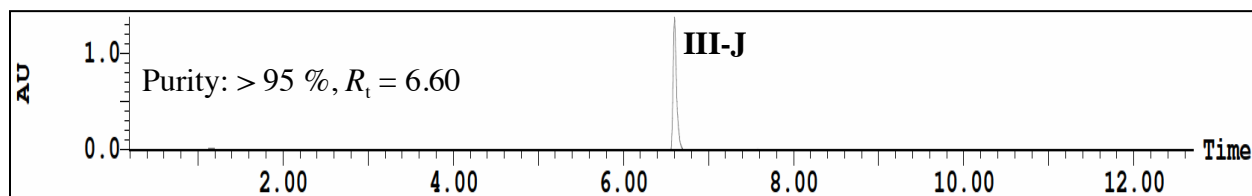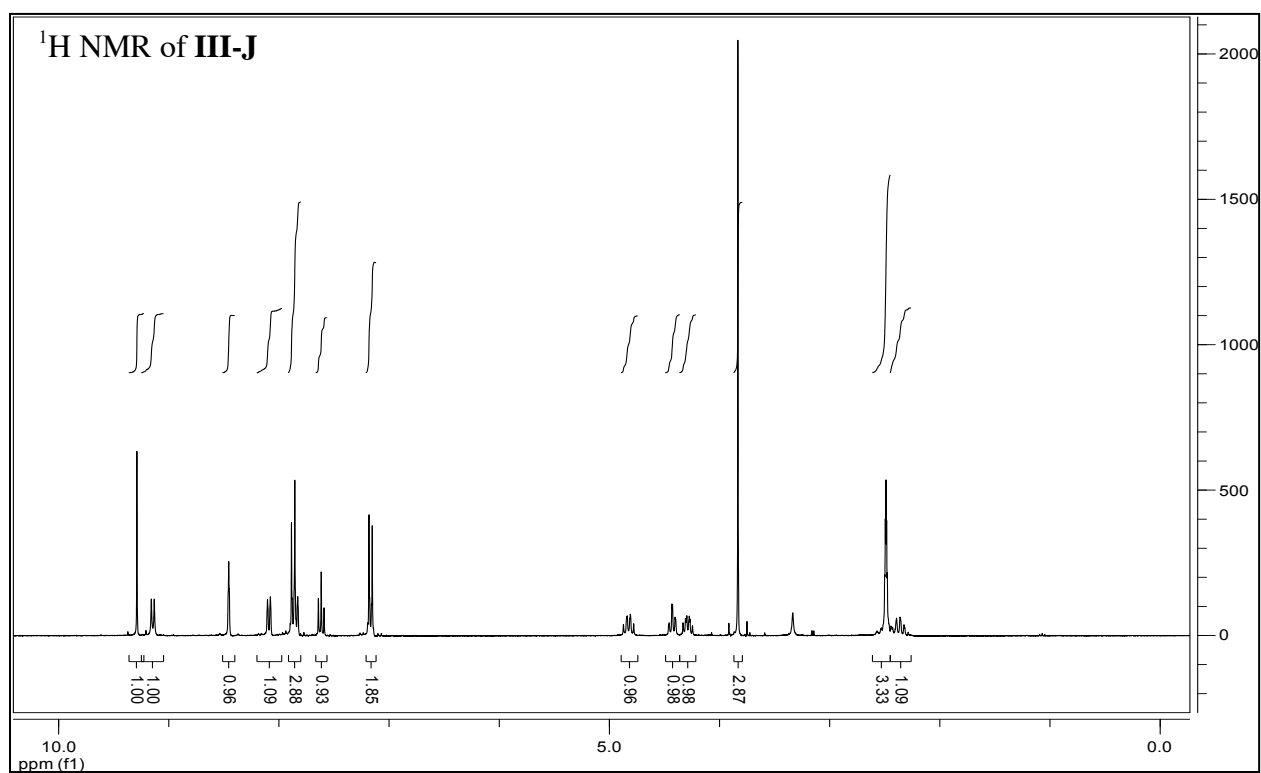

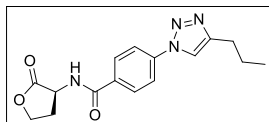

**Triazole IV-A.**

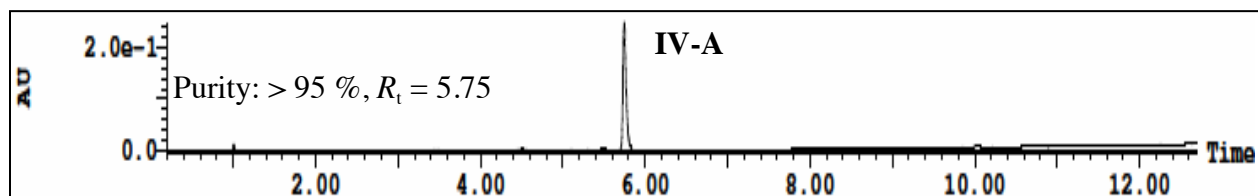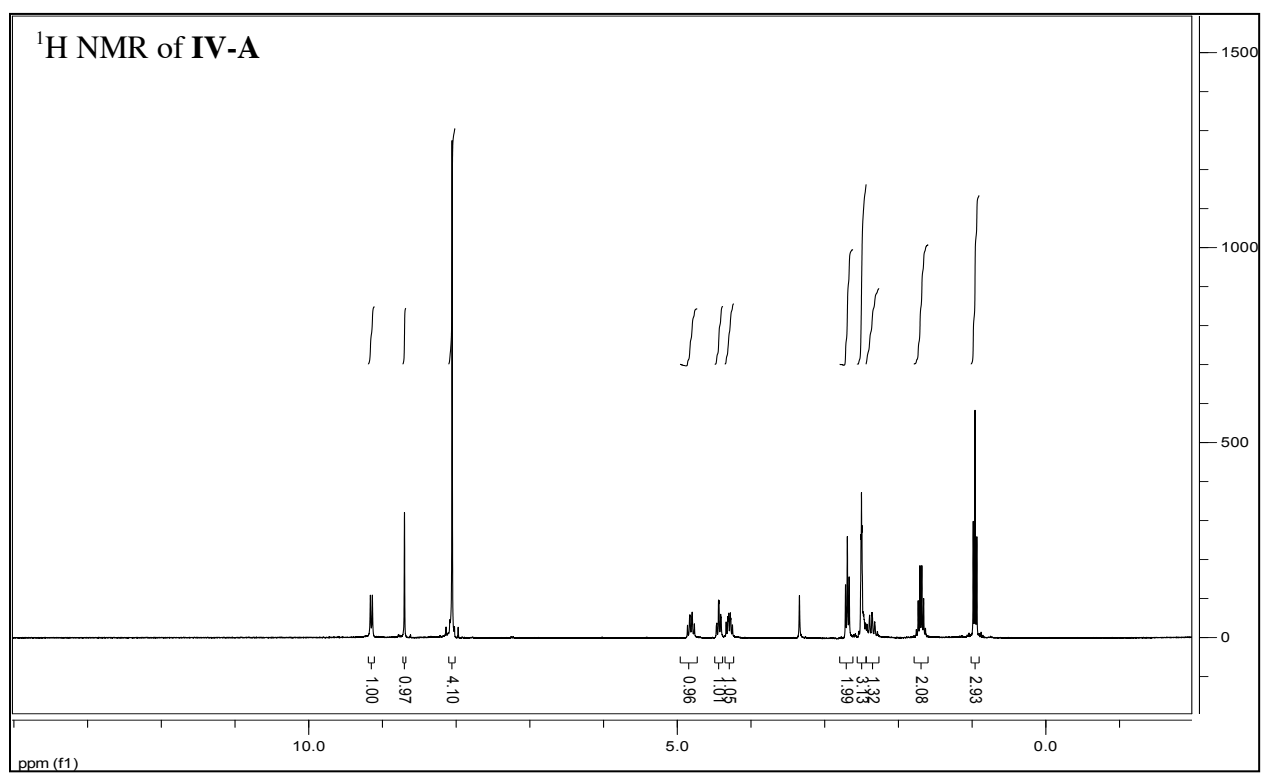

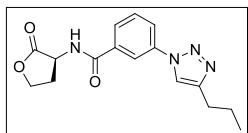

**Triazole IV-B**

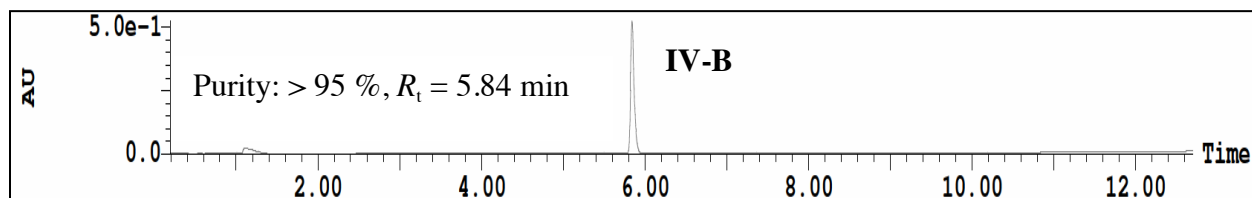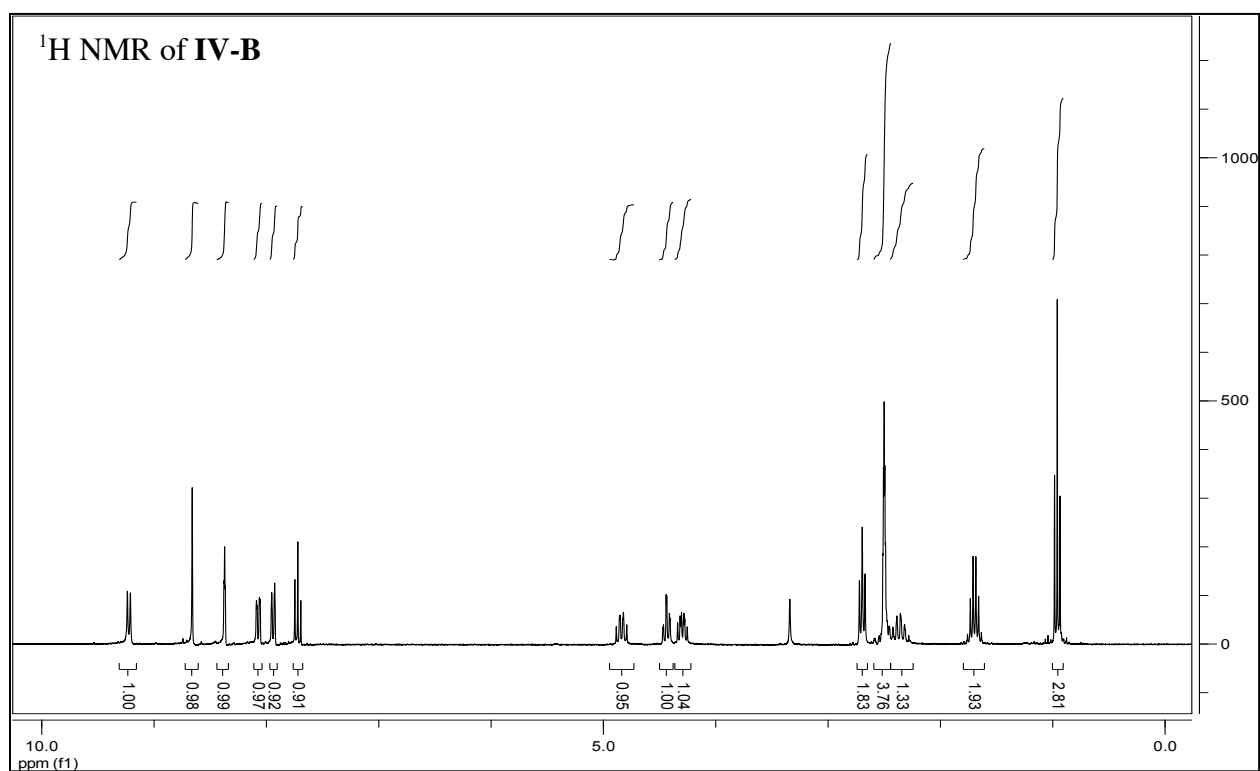

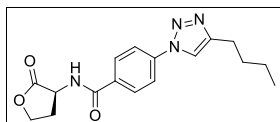

**Triazole IV-C.**

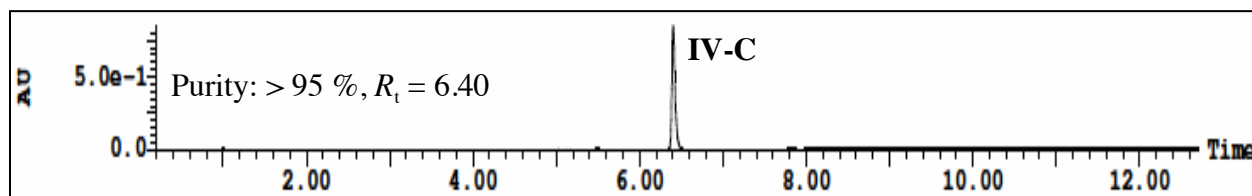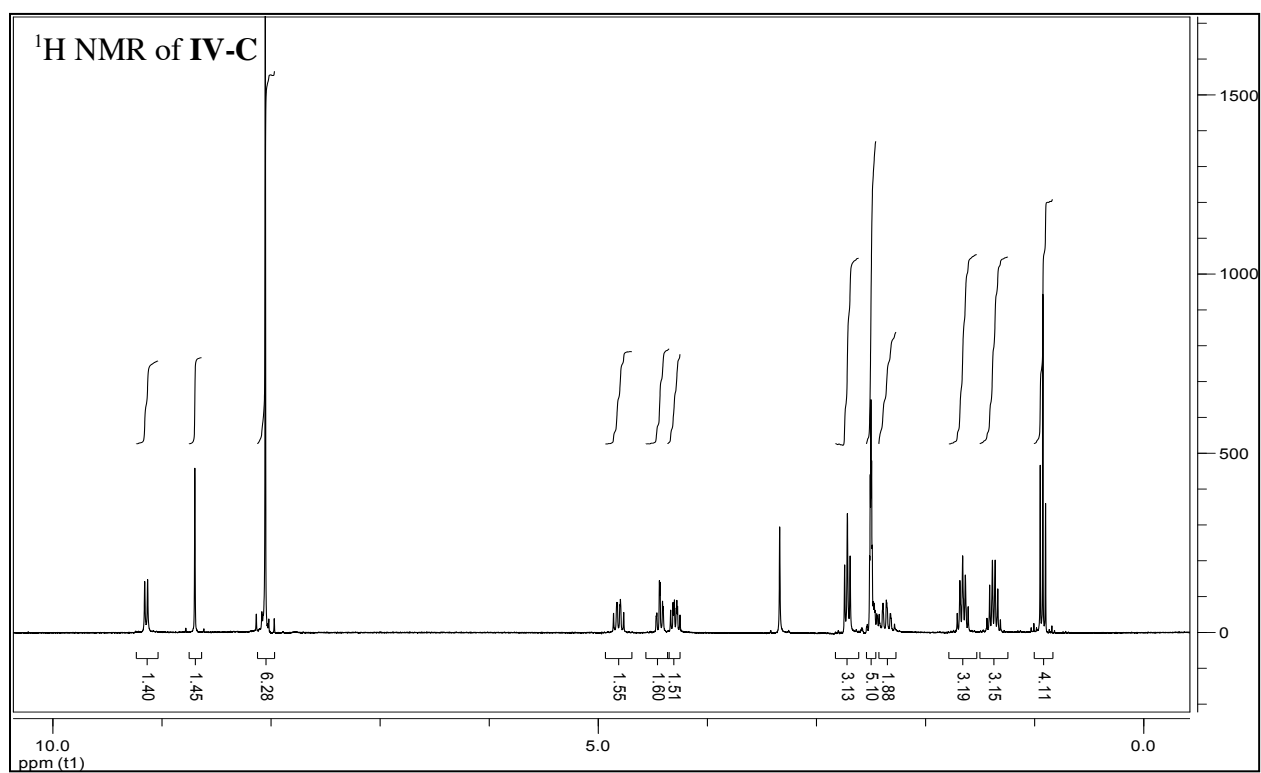

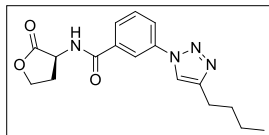

**Triazole IV-D.**

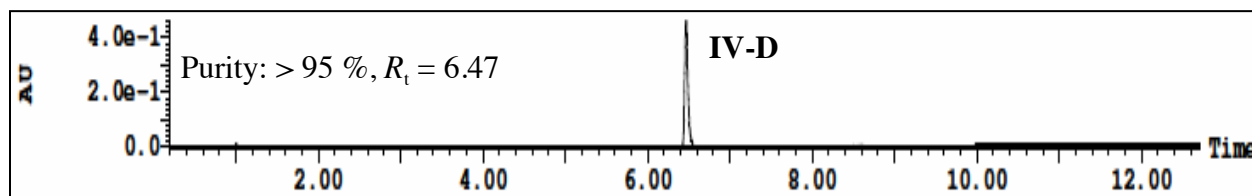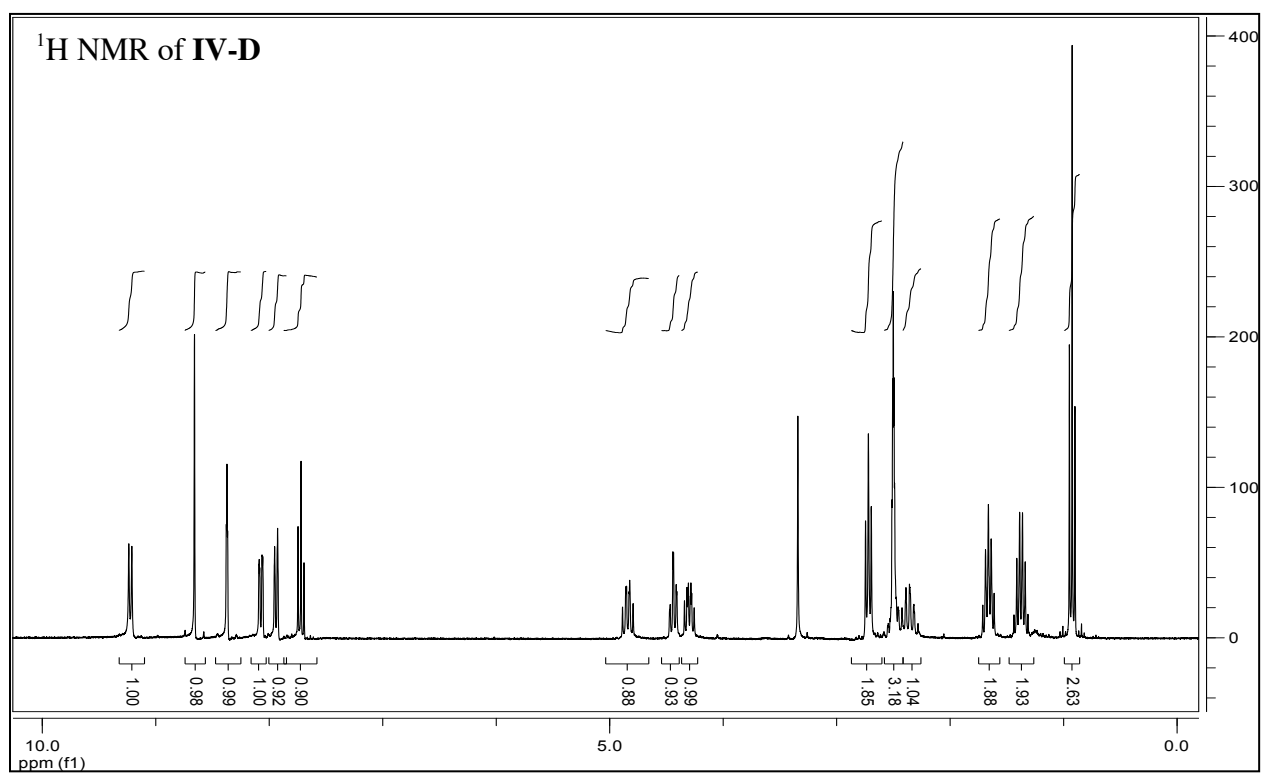

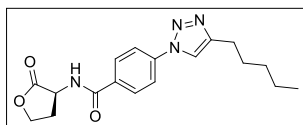

**Triazole IV-E.**

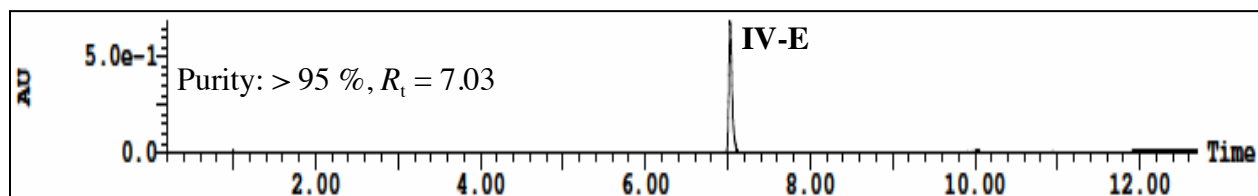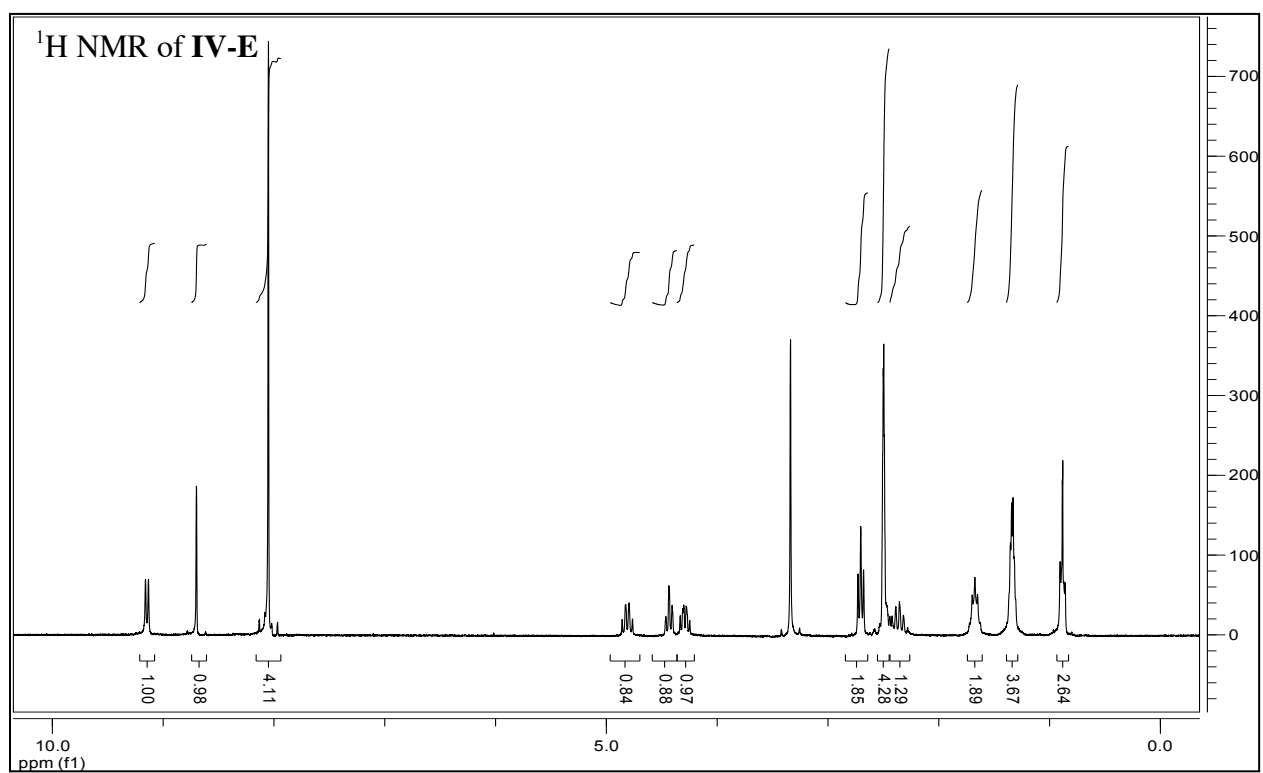

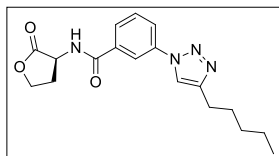

**Triazole IV-F.**

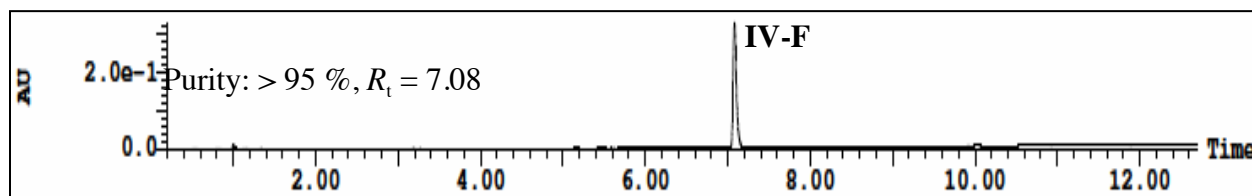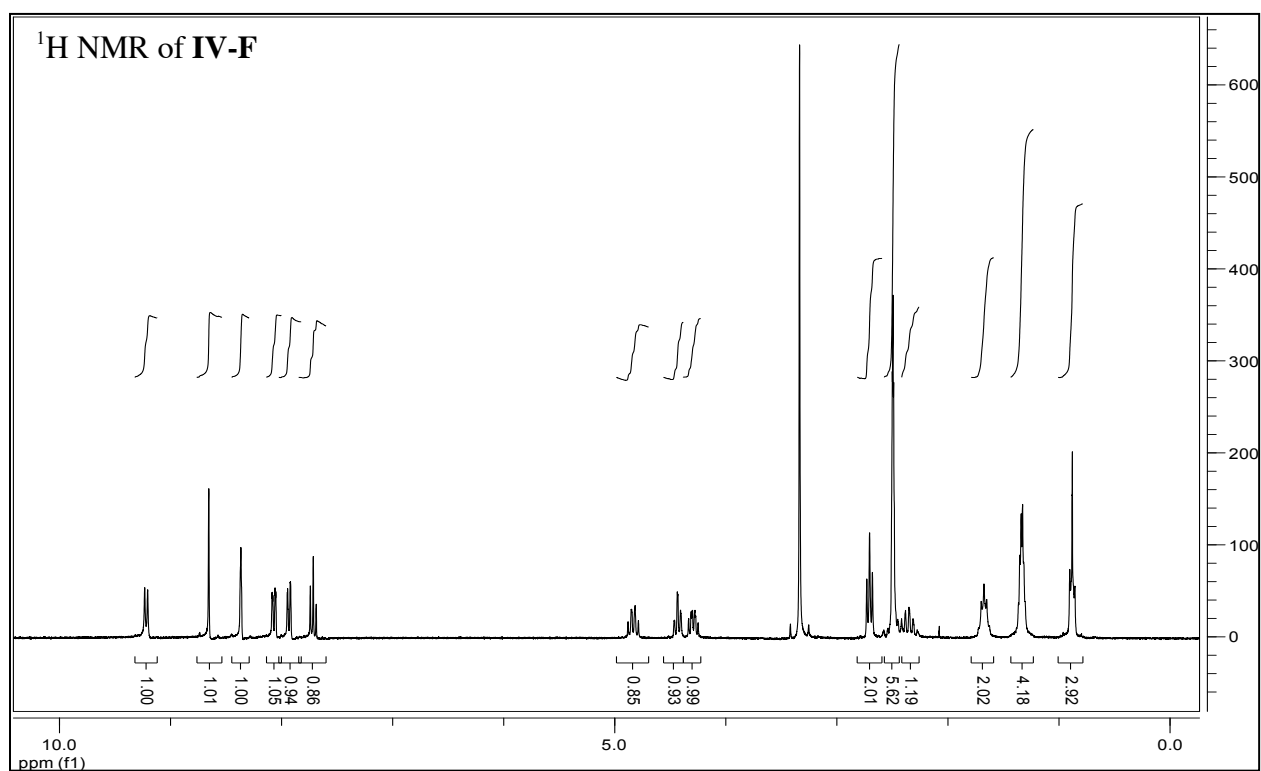



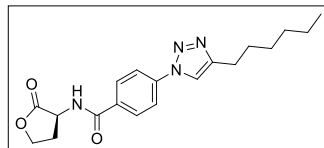

**Triazole IV-G.**

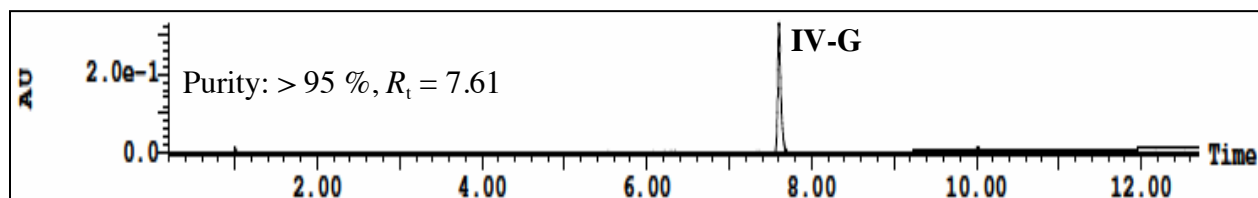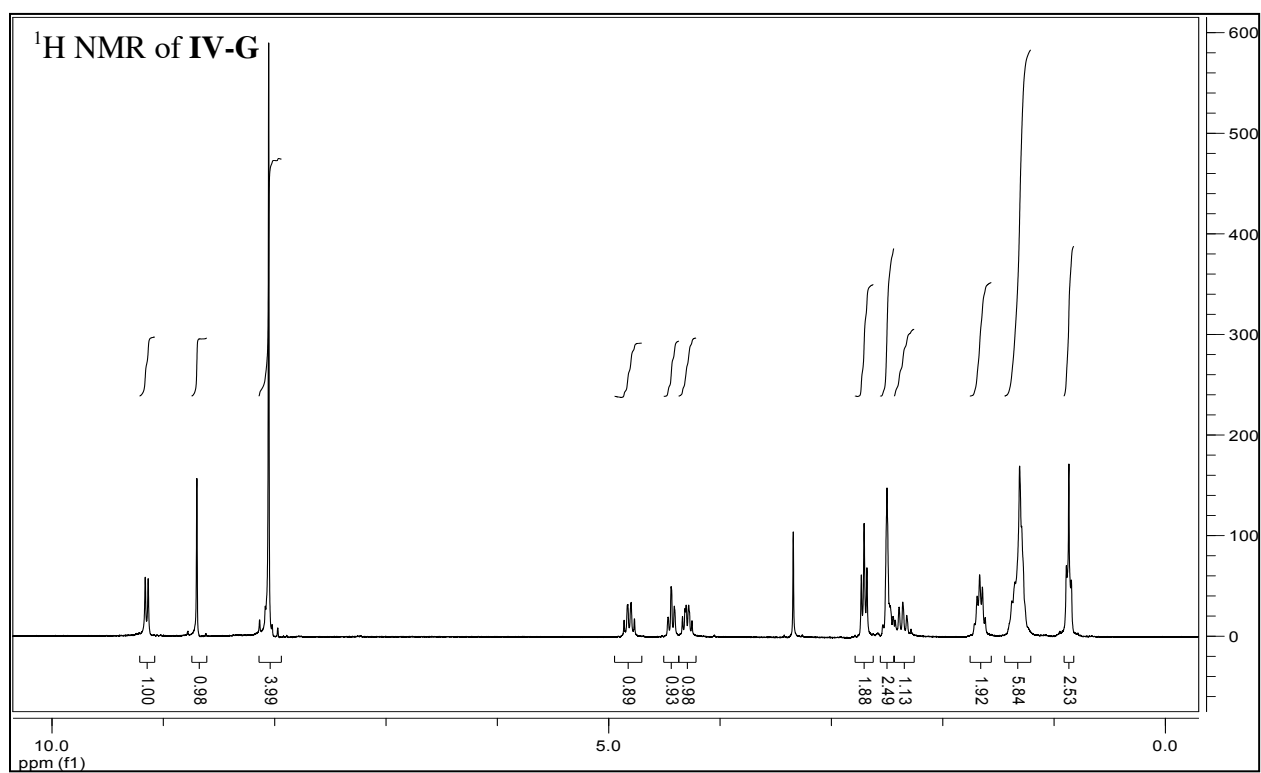

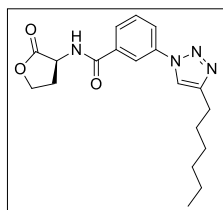

**Triazole IV-H.**

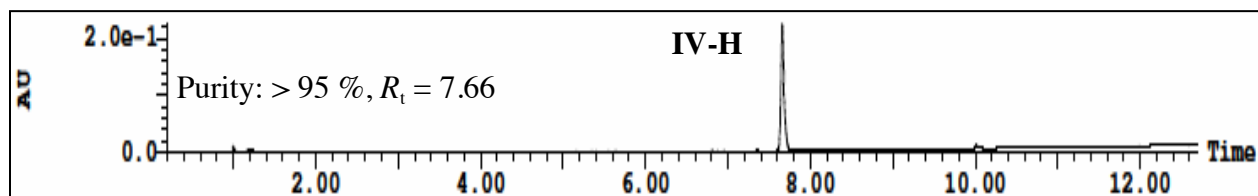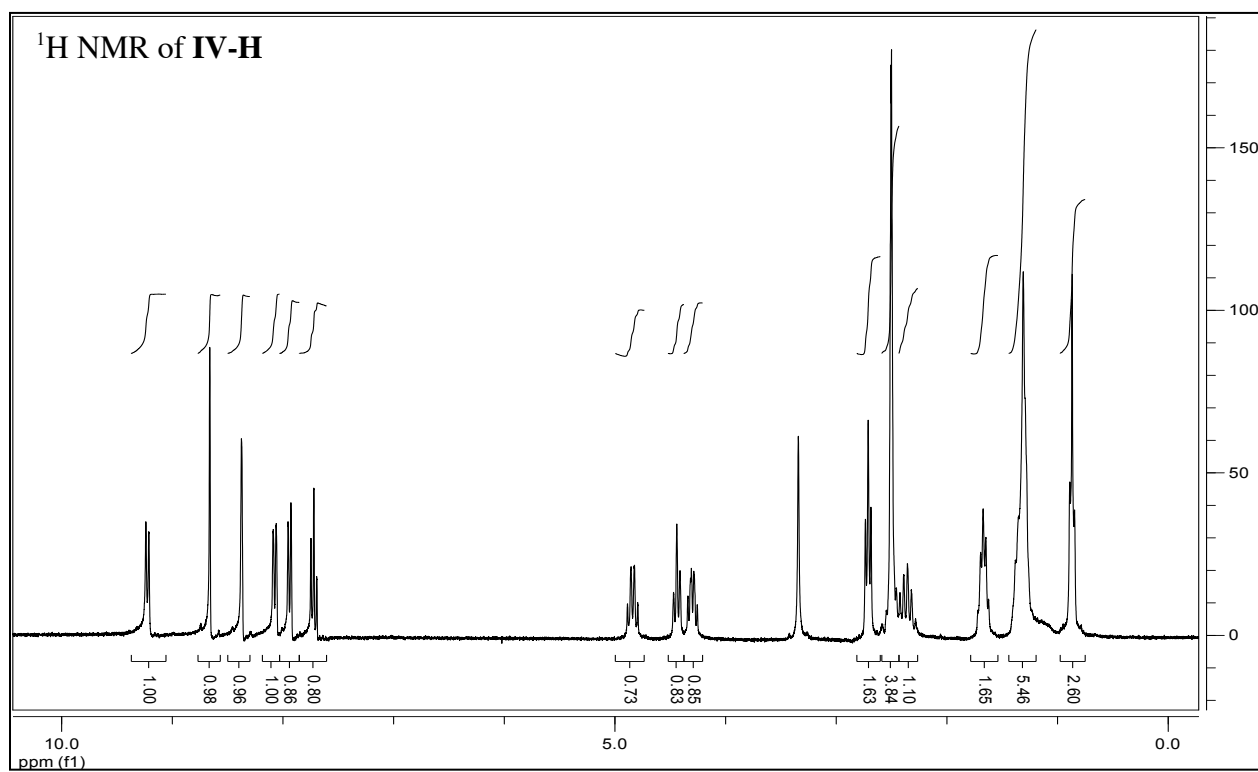

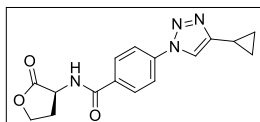

**Triazole IV-I.**

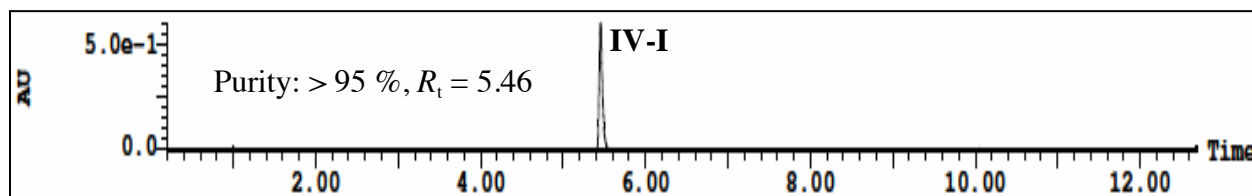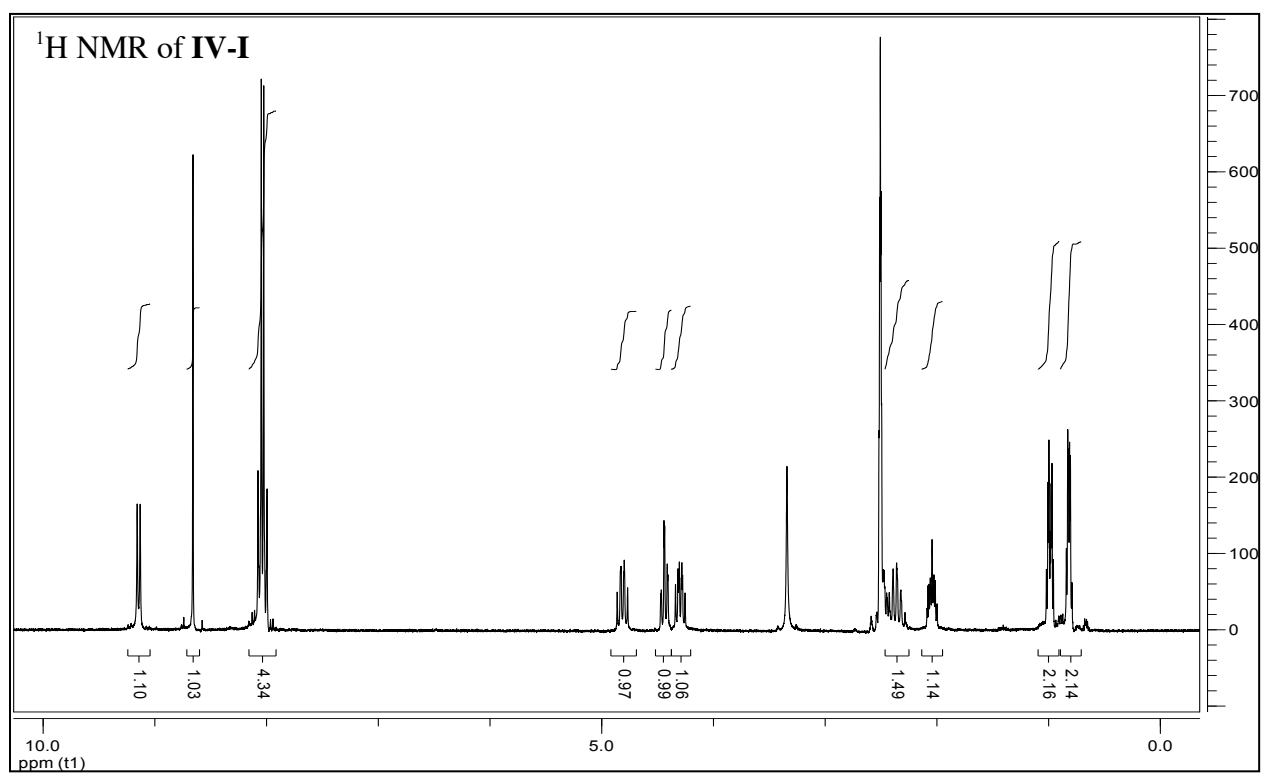

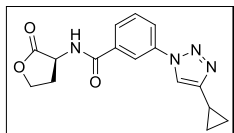

**Triazole IV-J.**

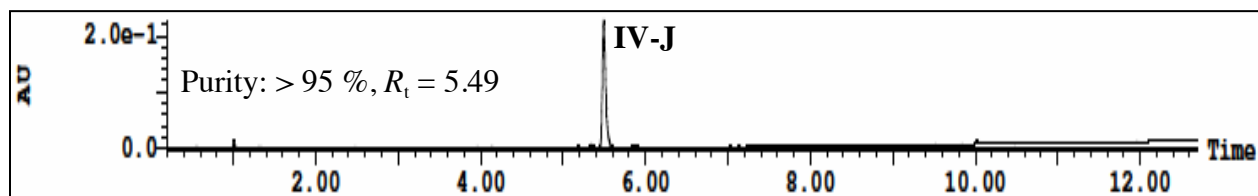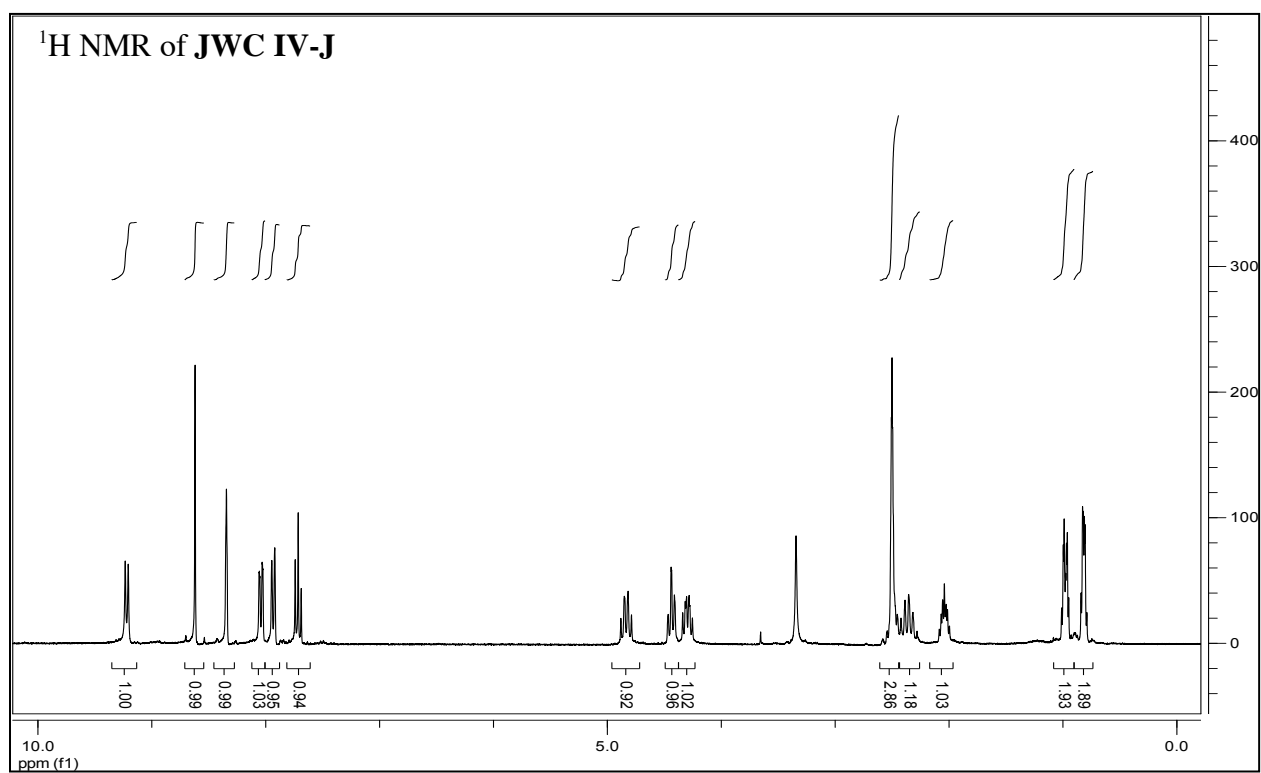

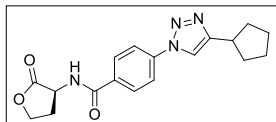

**Triazole IV-K.**

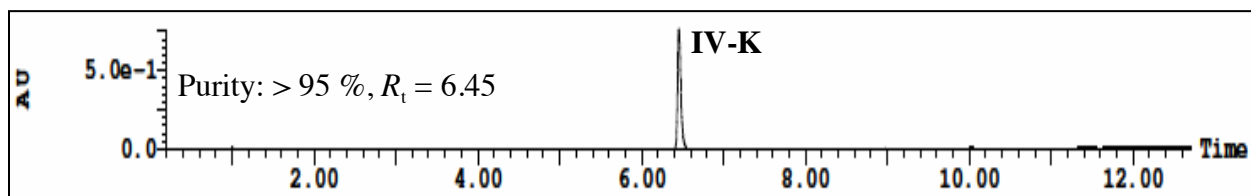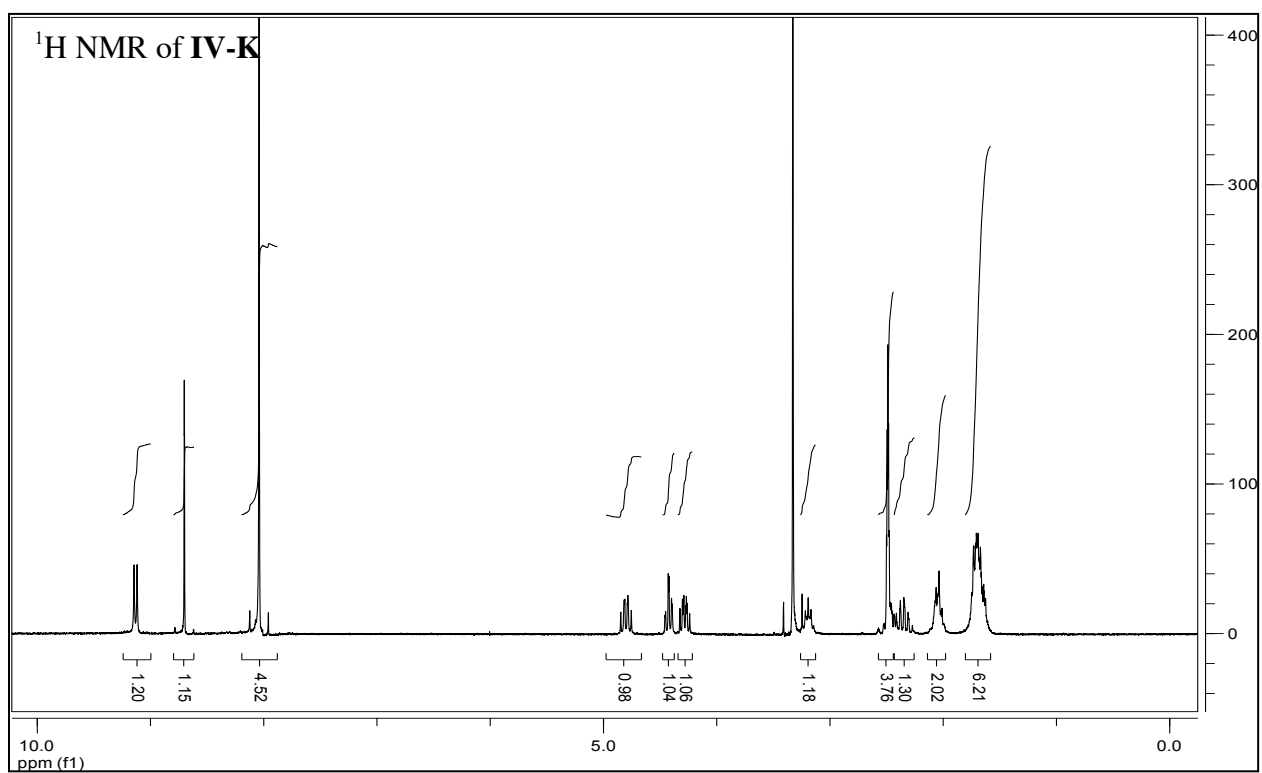

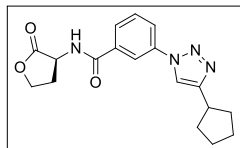

Triazole IV-L.

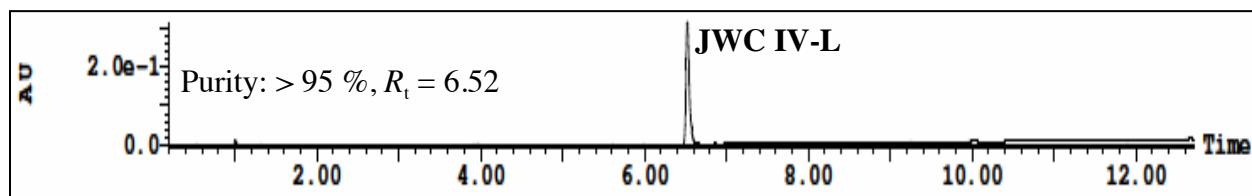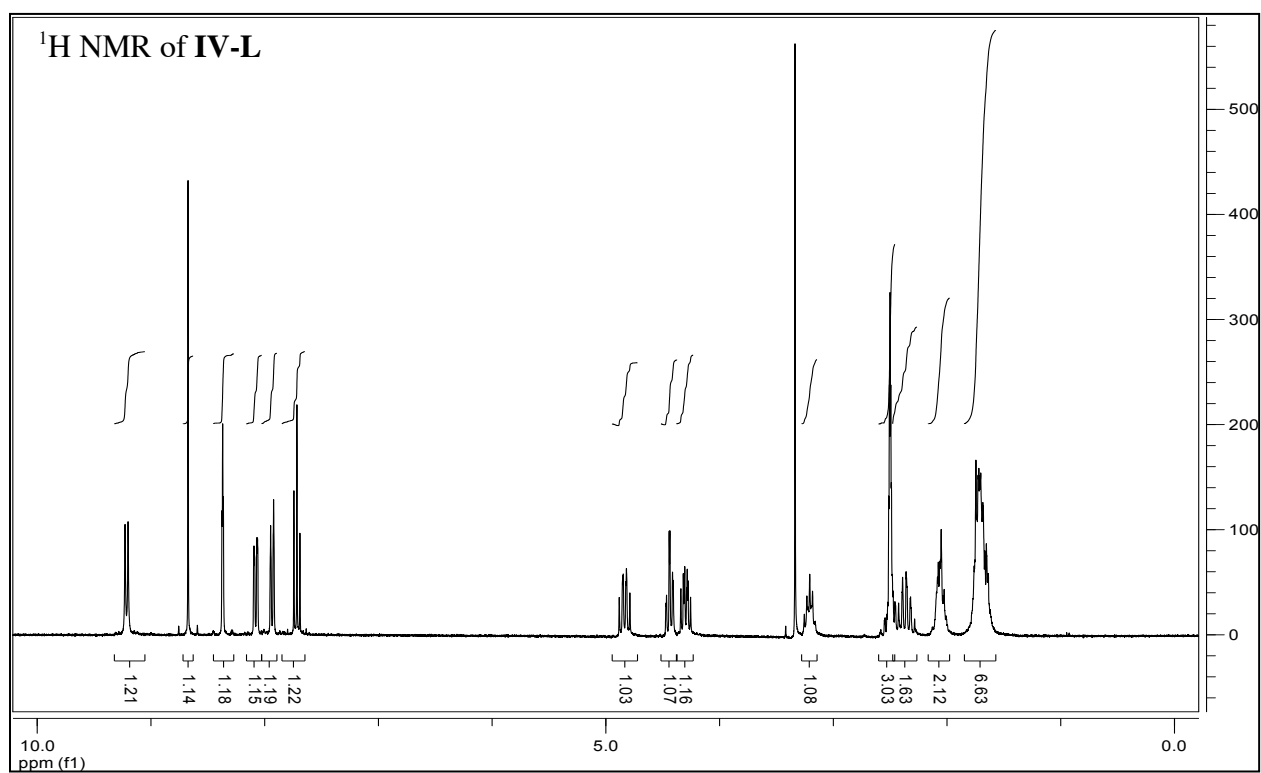

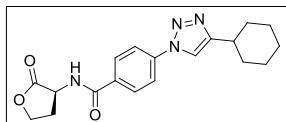

**Triazole IV-M.**

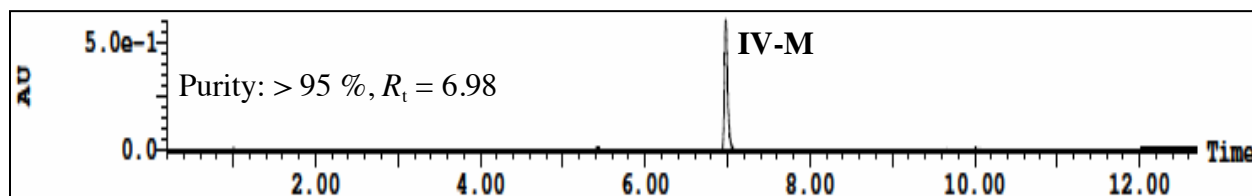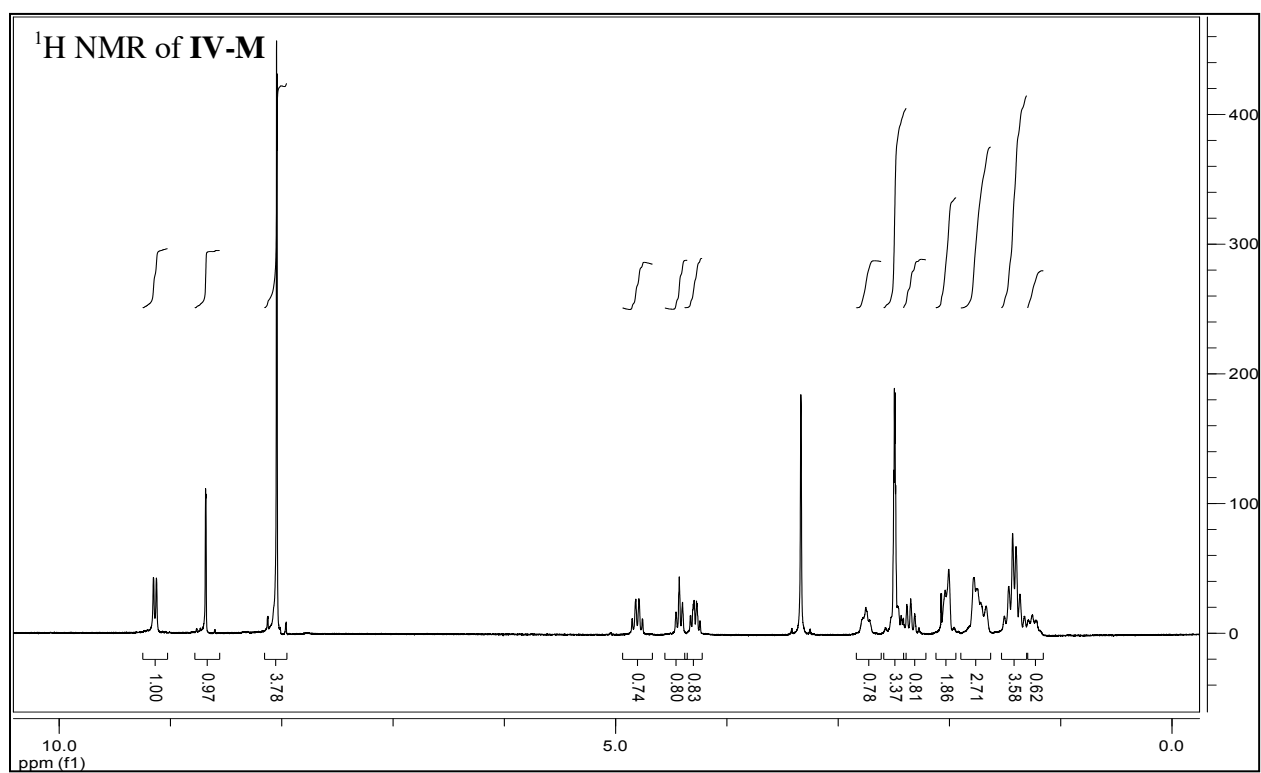

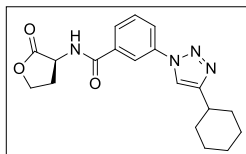

**Triazole IV-N.**

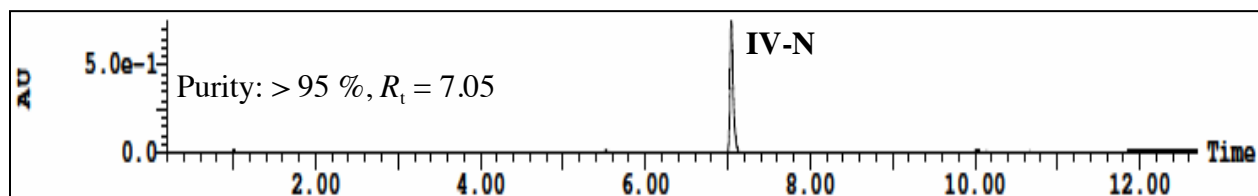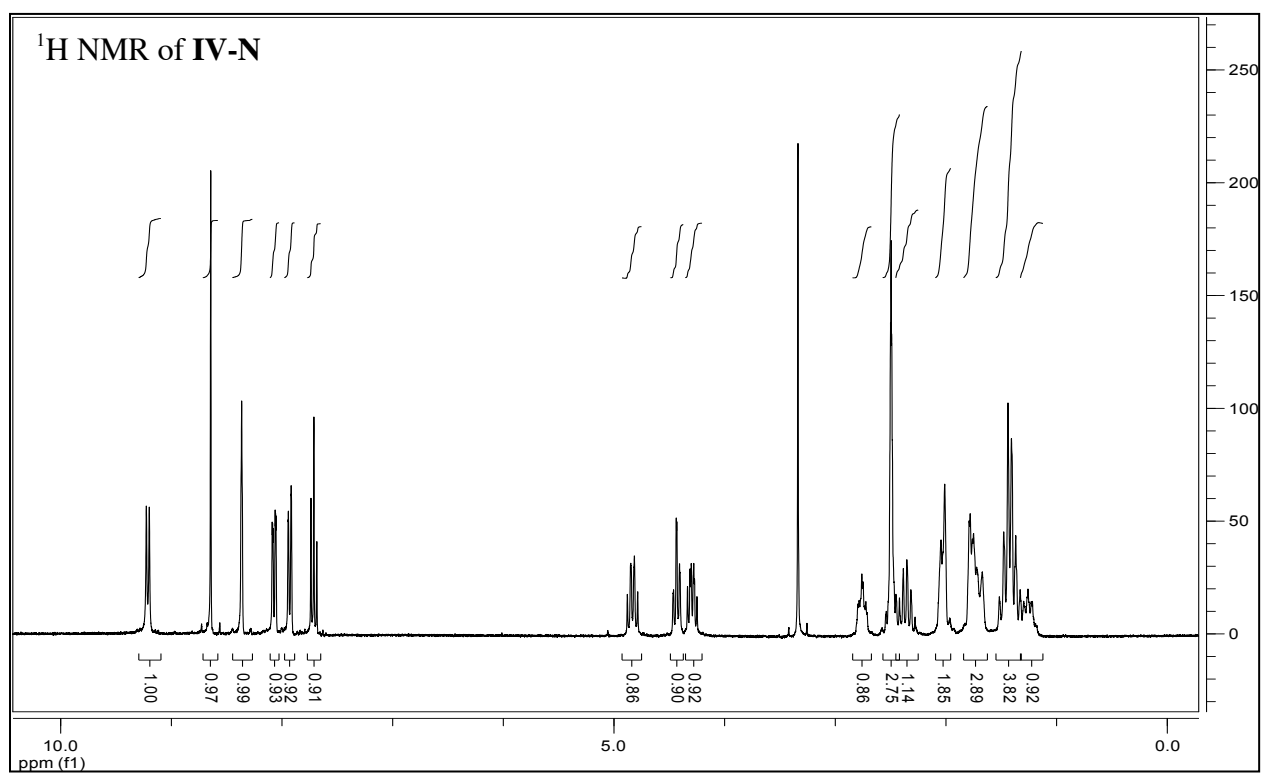



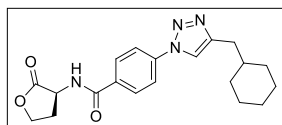

**Triazole IV-O.**

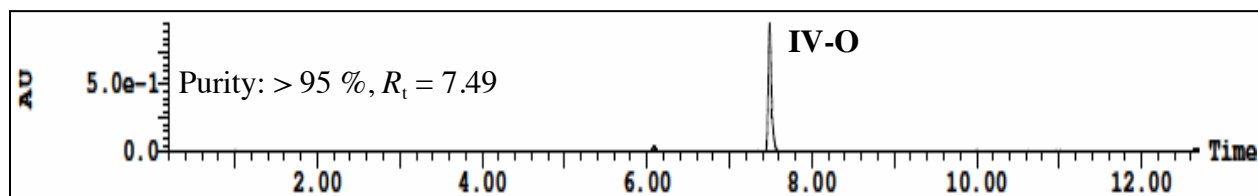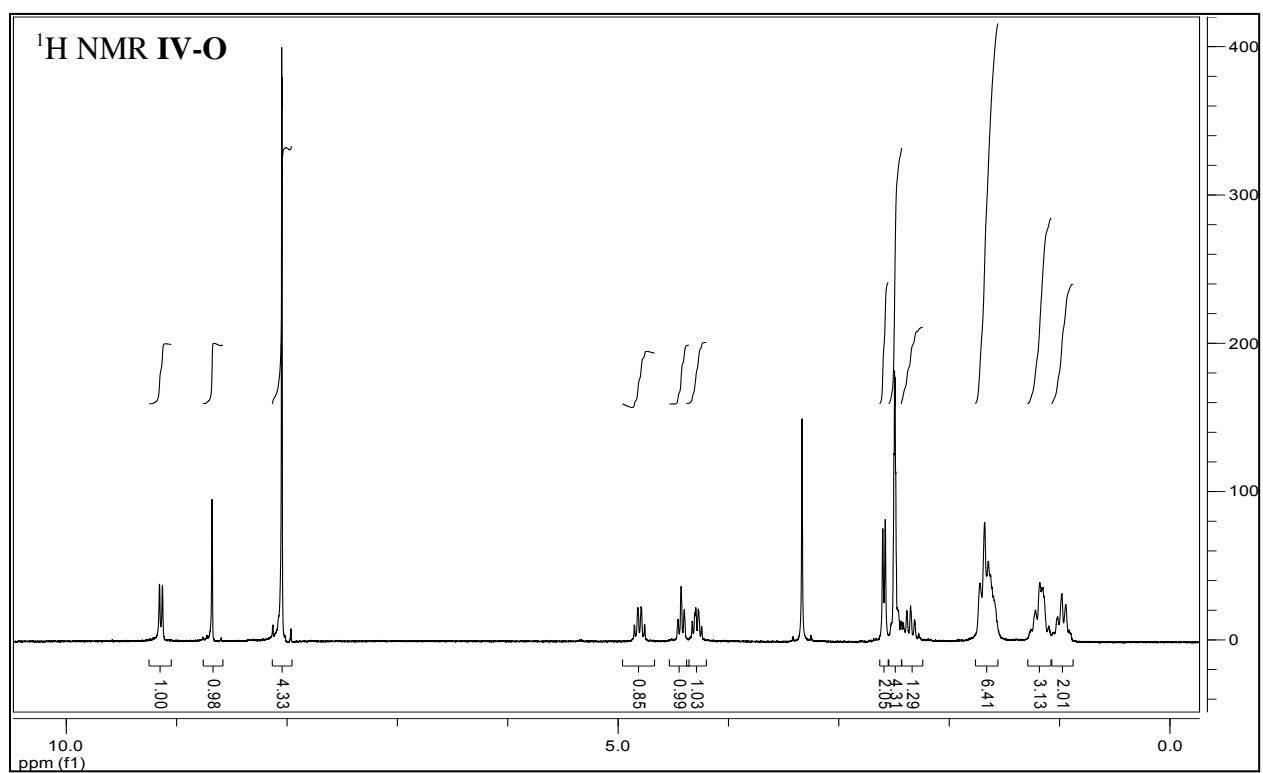

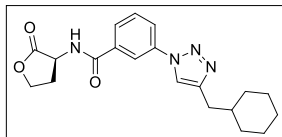

Triazole IV-P.

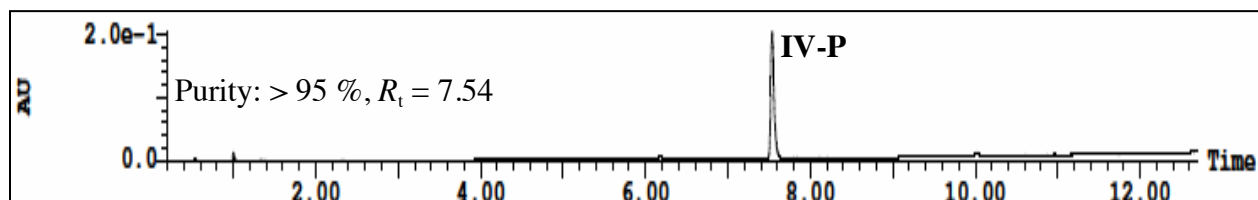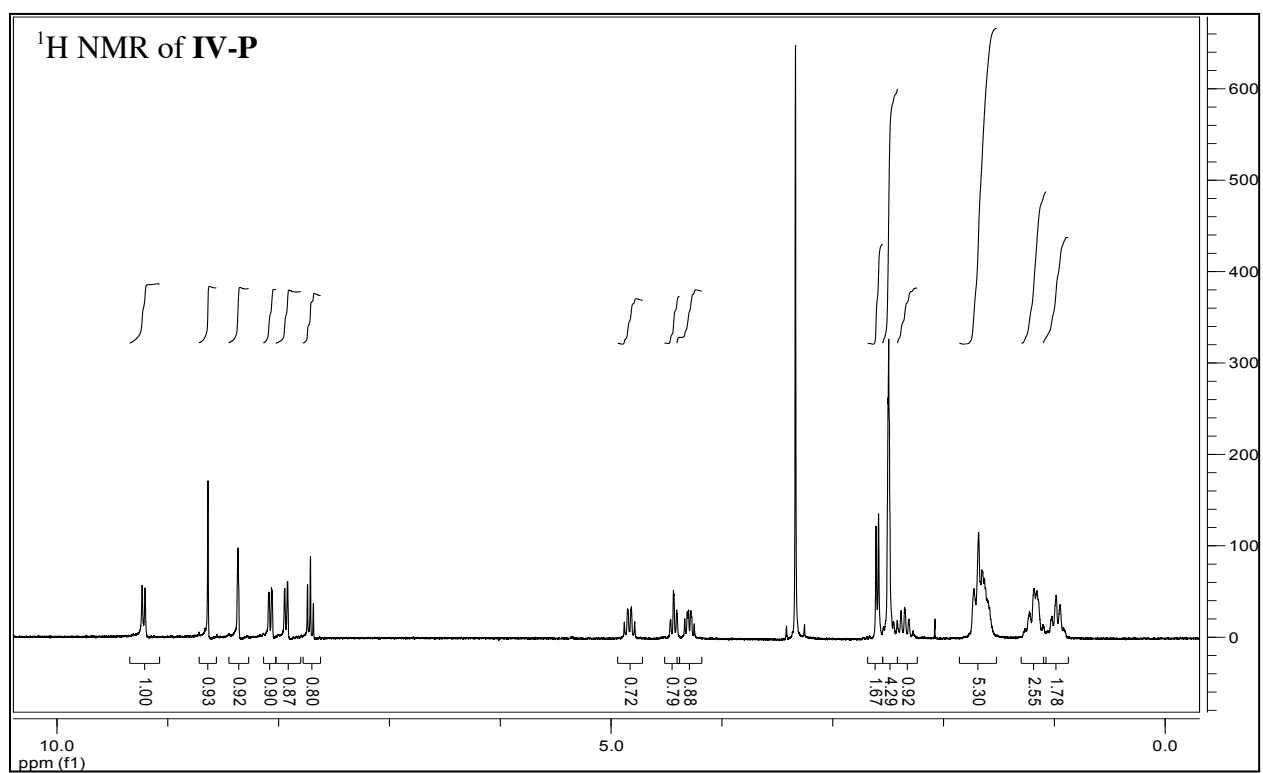

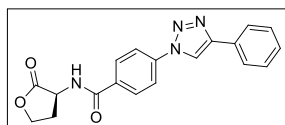

**Triazole IV-Q.**

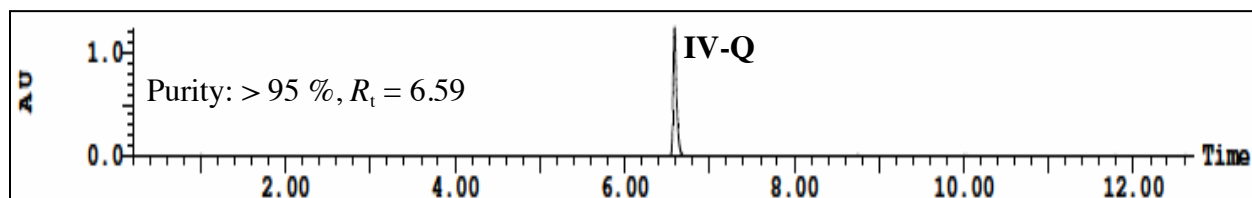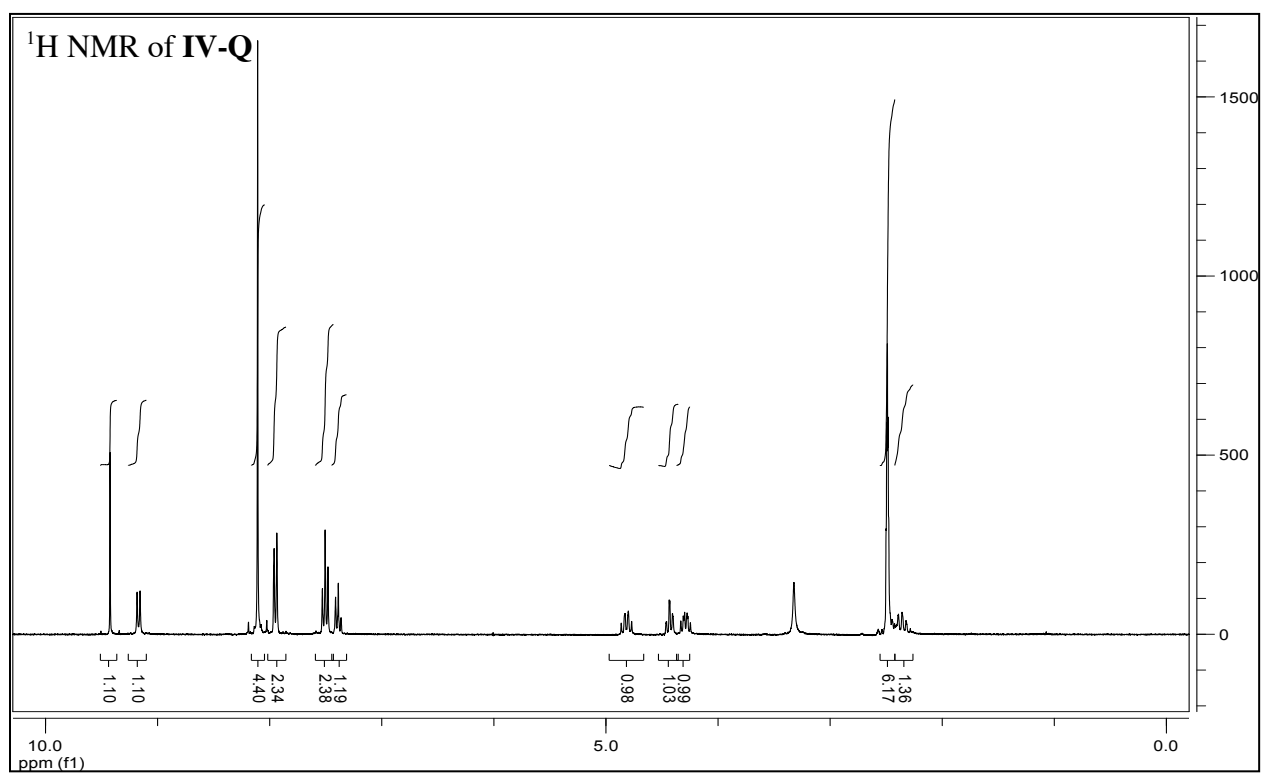

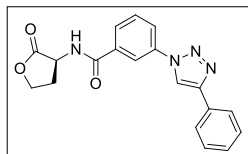

**Triazole IV-R.**

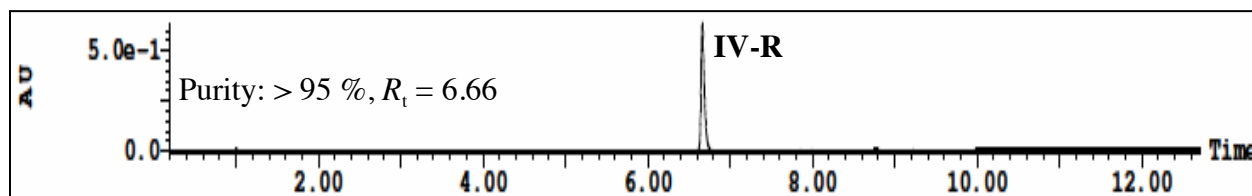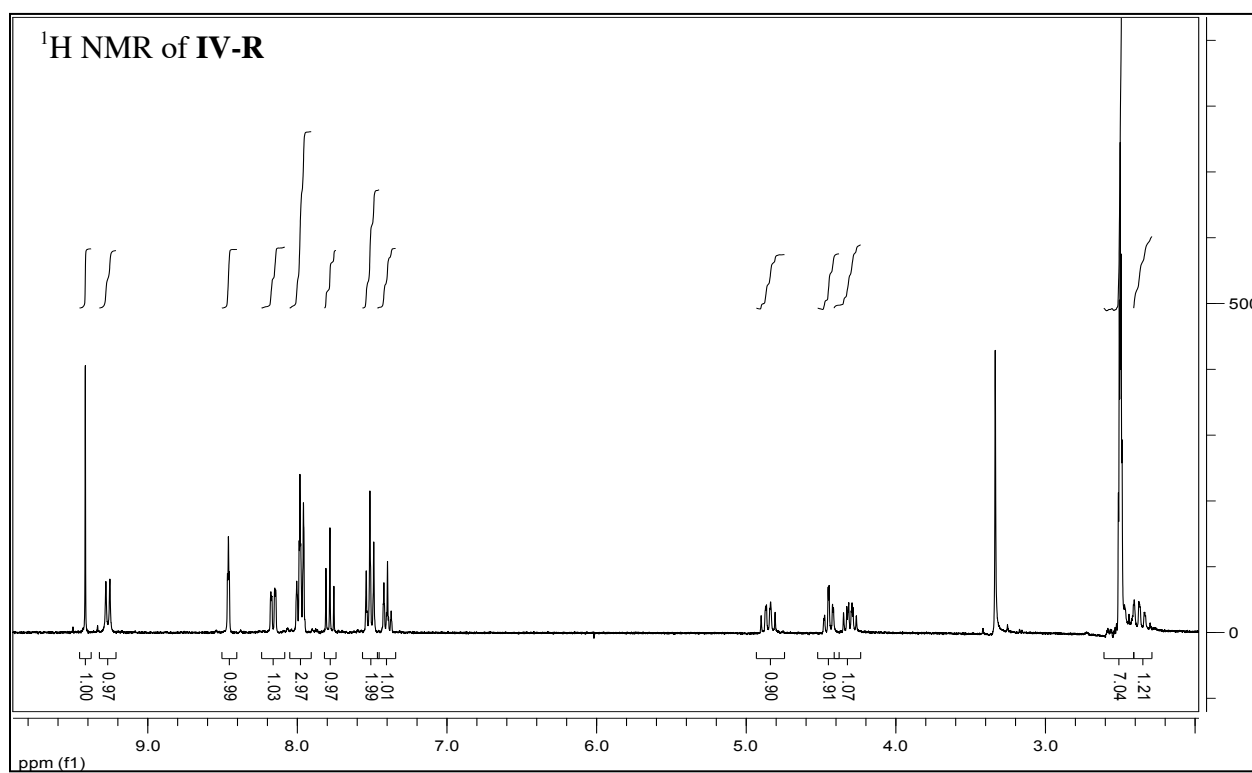

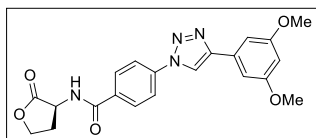

**Triazole IV-S.**

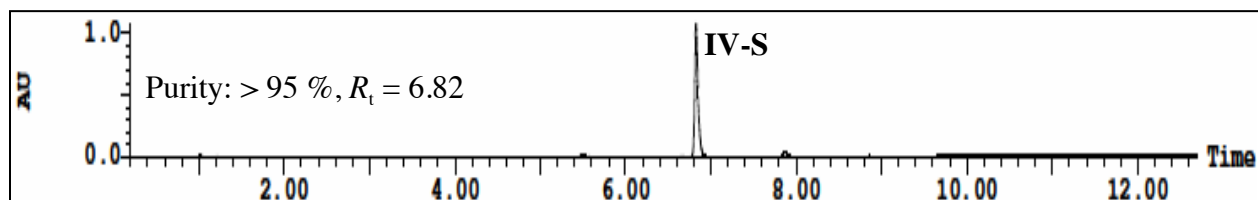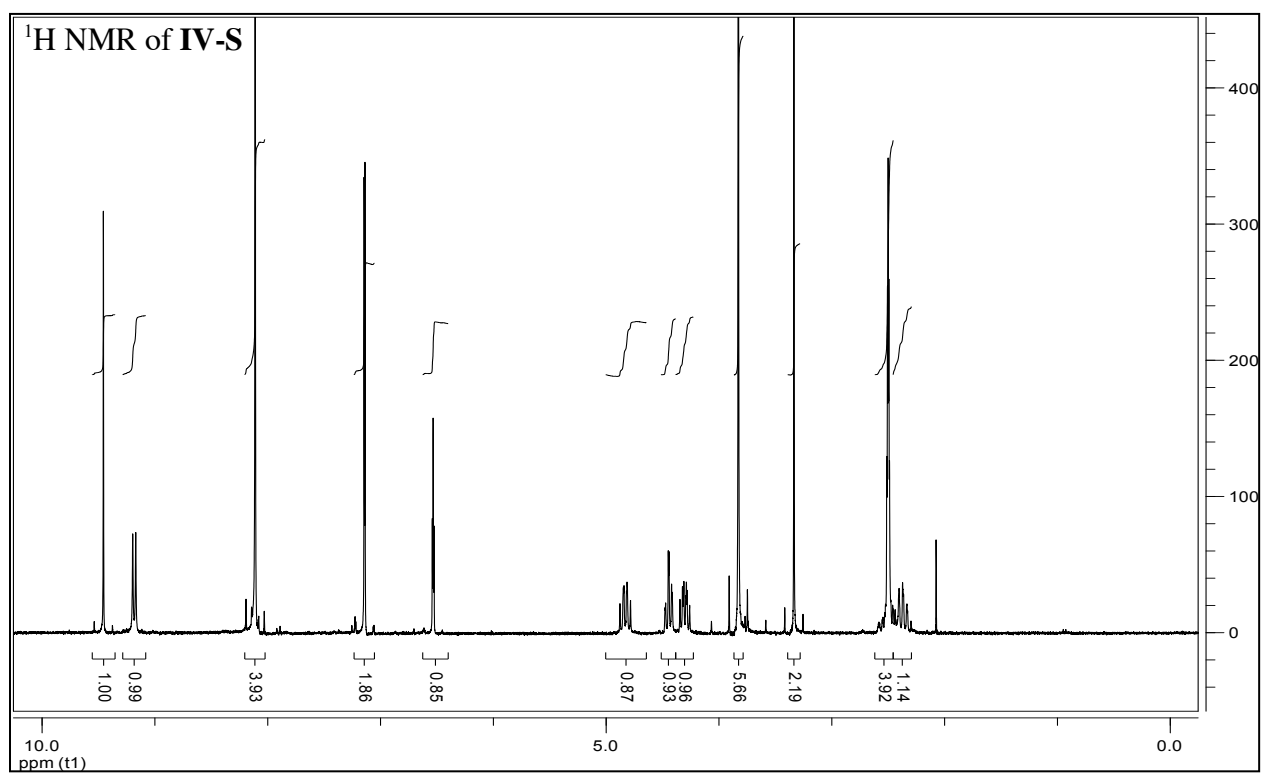

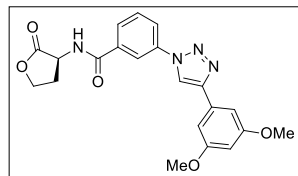

**Triazole IV-T.**

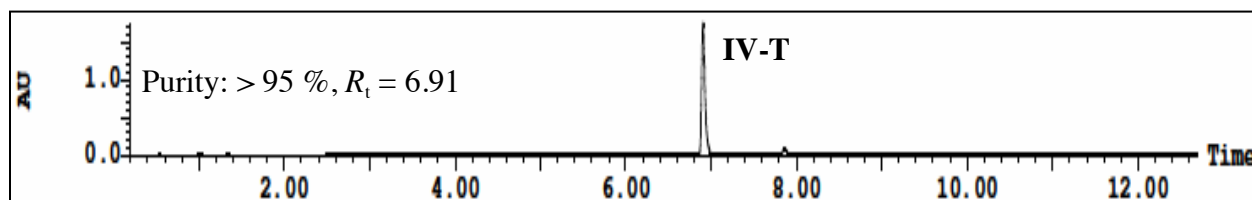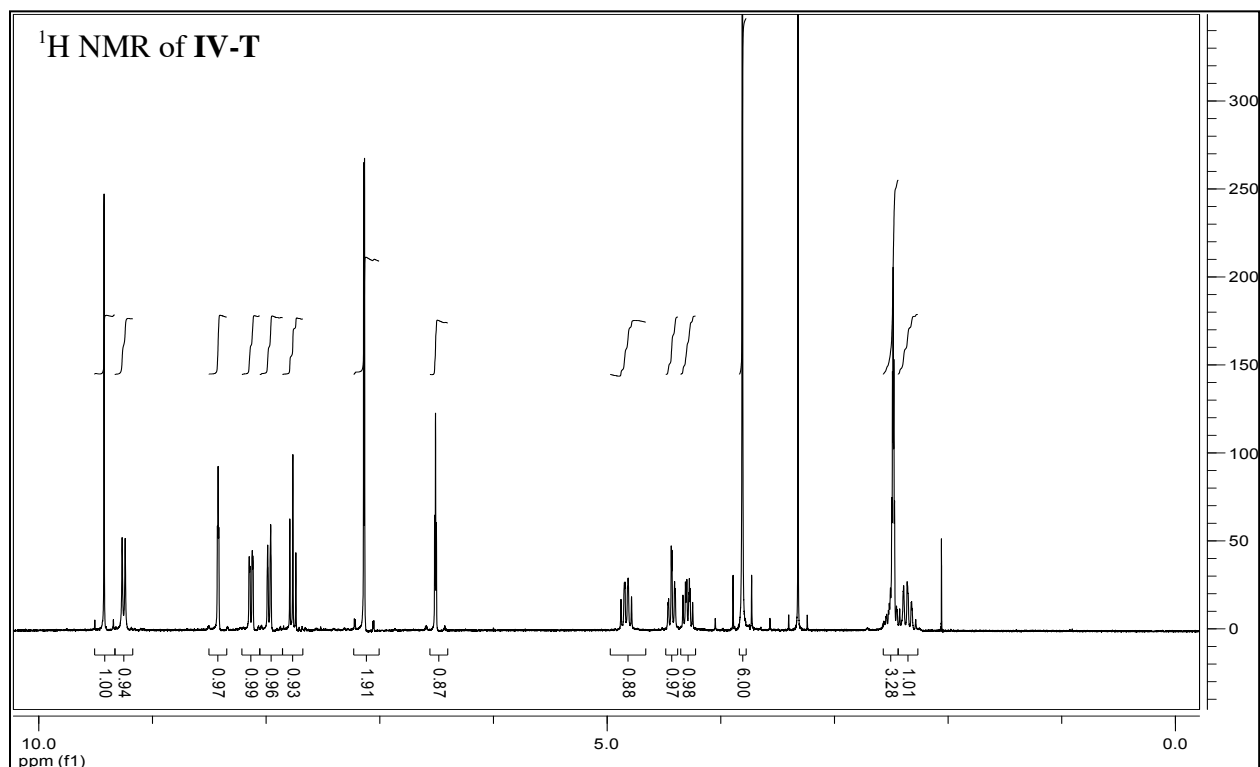

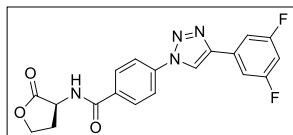

**Triazole IV-U.**

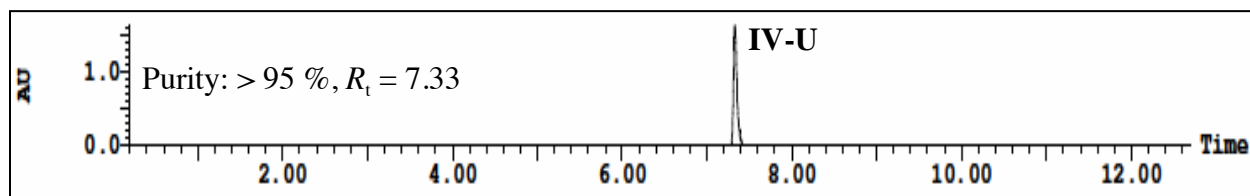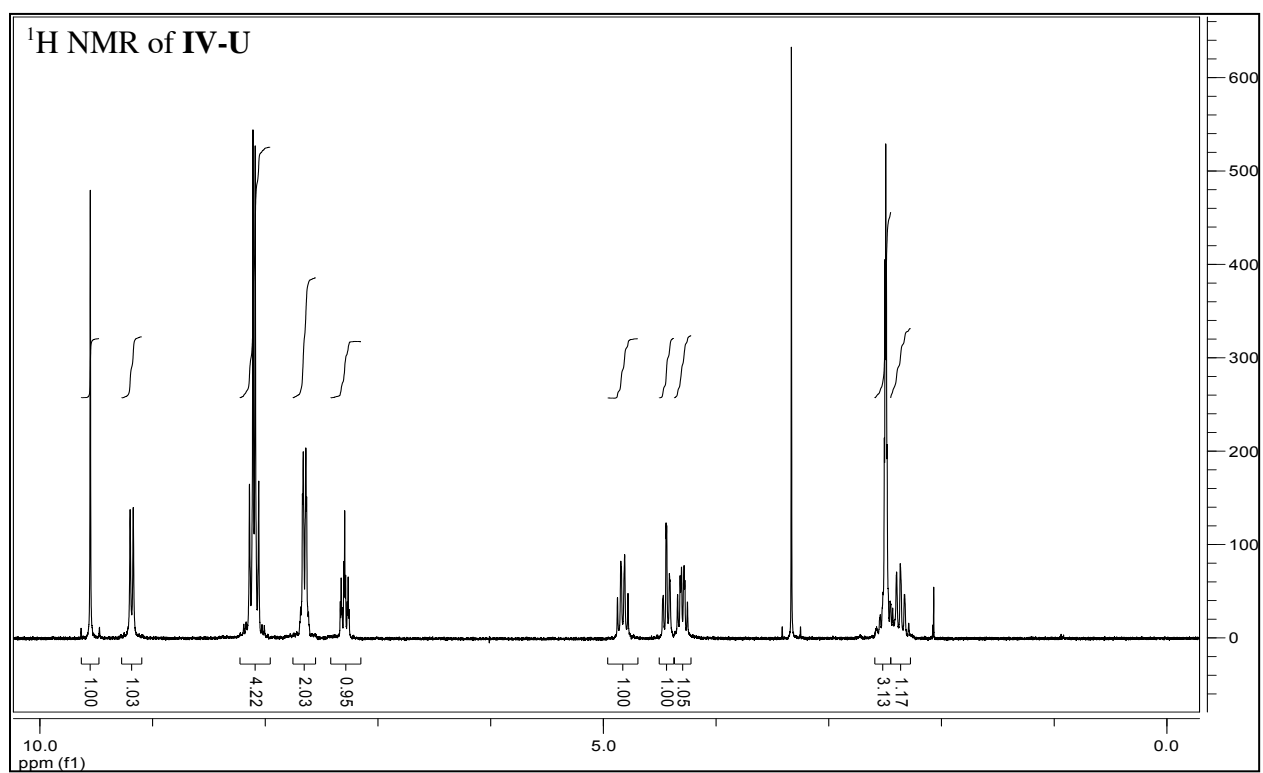

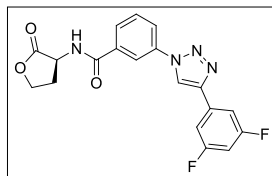

**Triazole IV-V.**

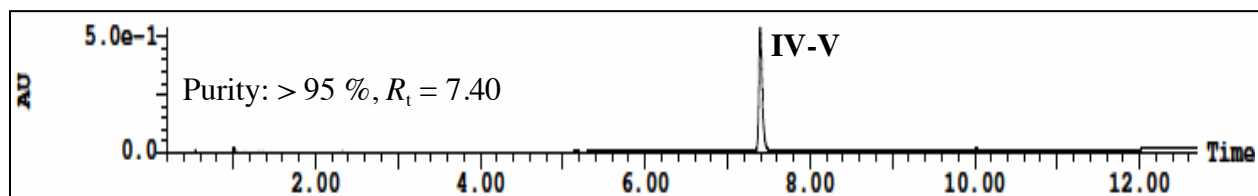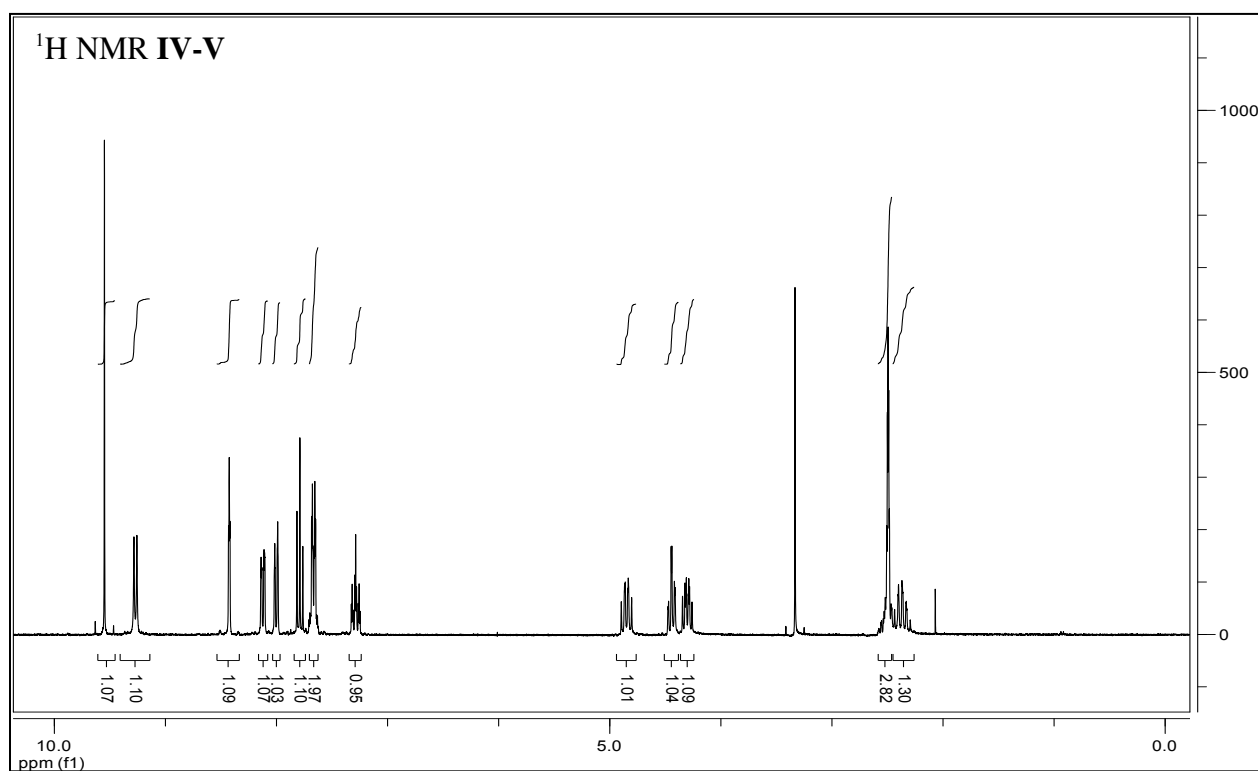



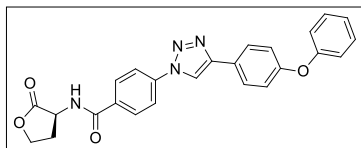

Triazole IV-W.

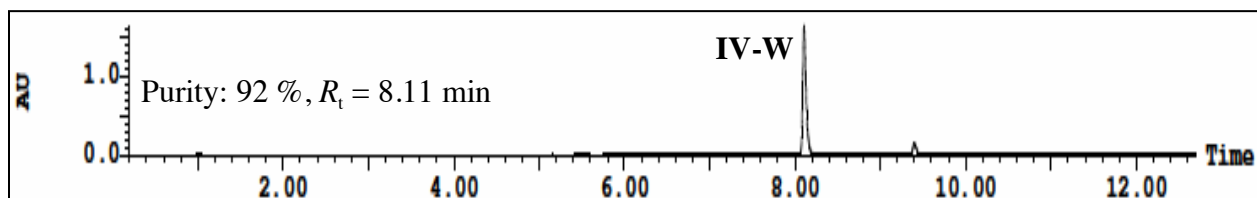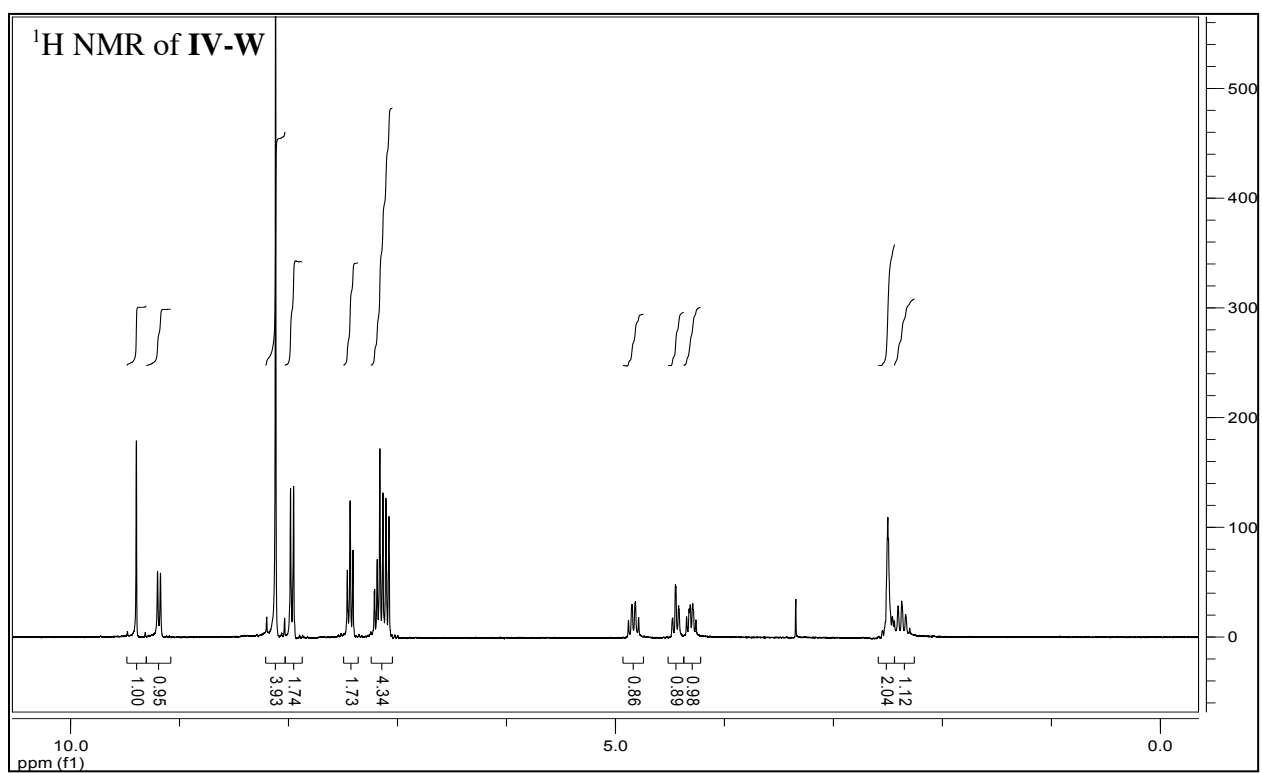

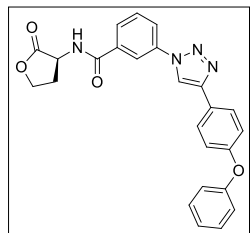

**Triazole IV-X.**

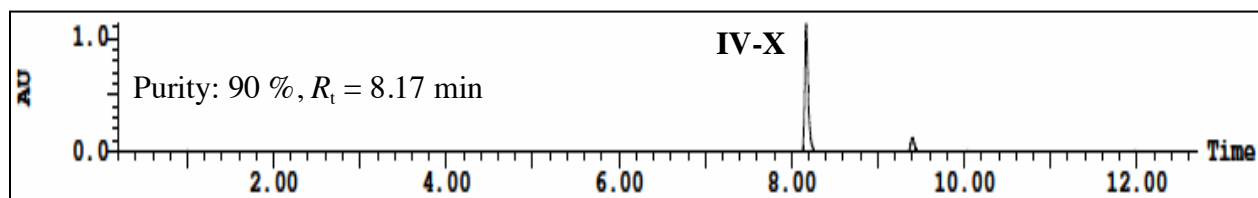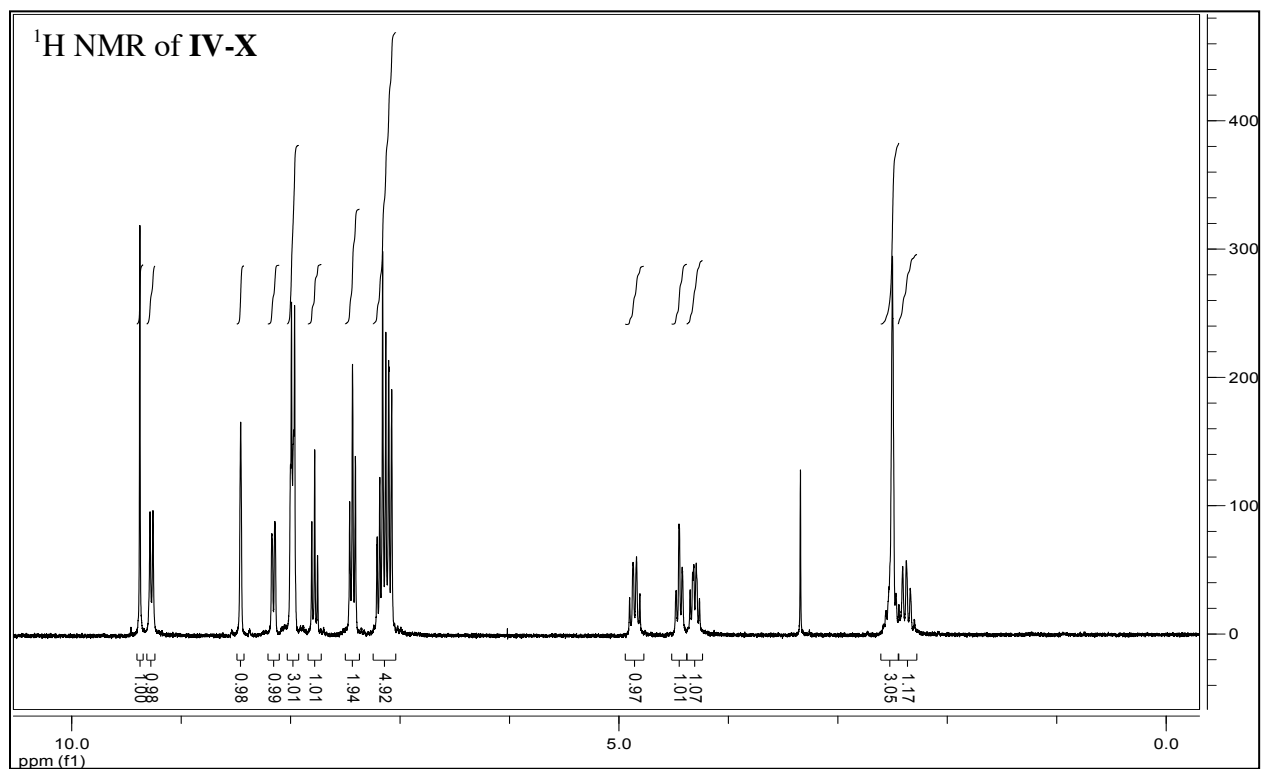

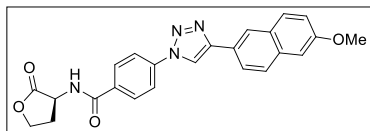

**Triazole IV-Y.**

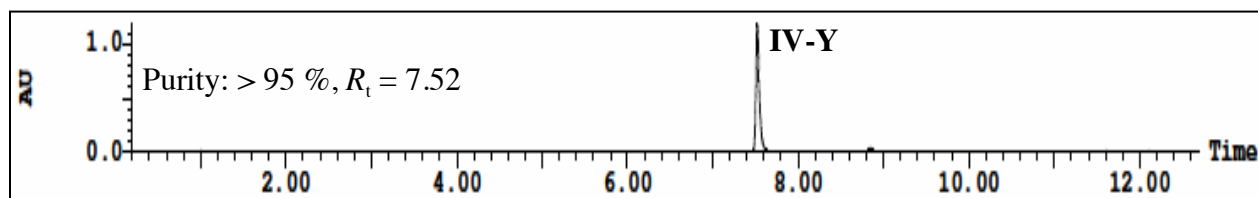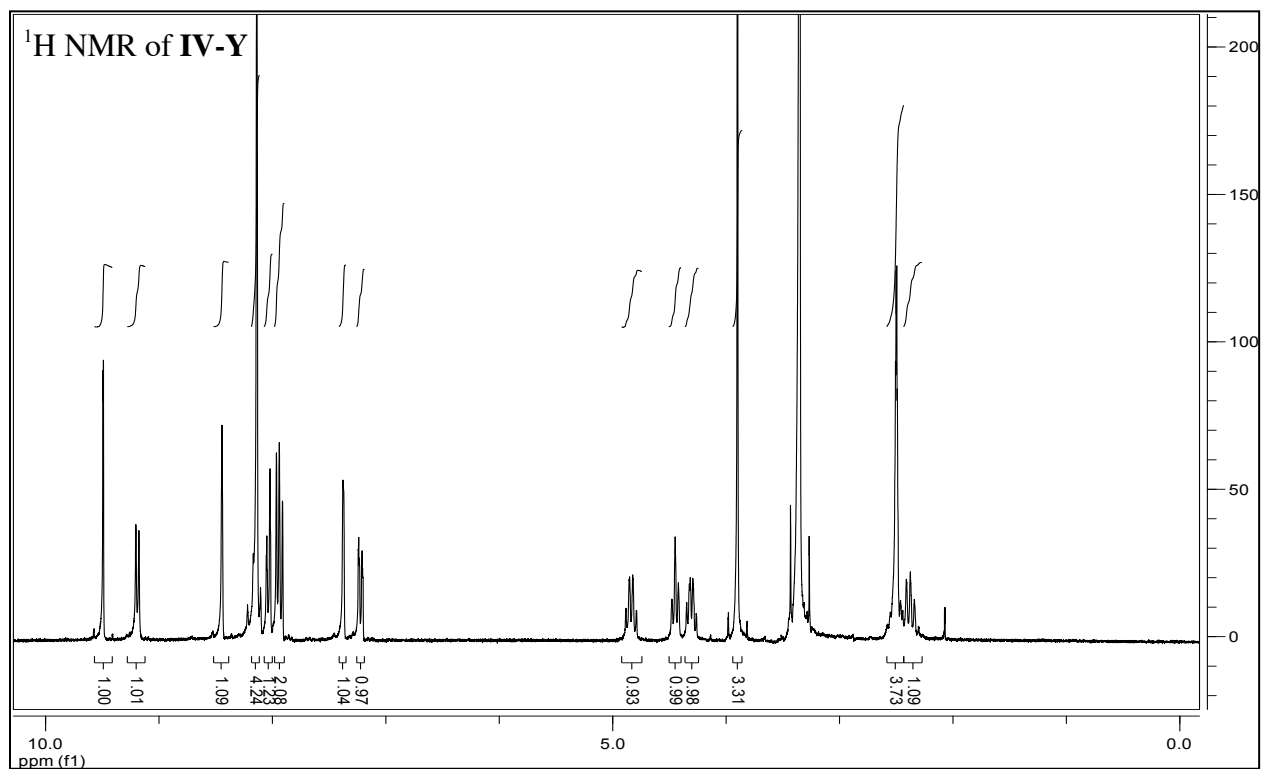

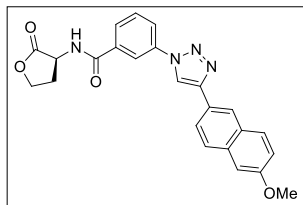

**Triazole IV-Z.**

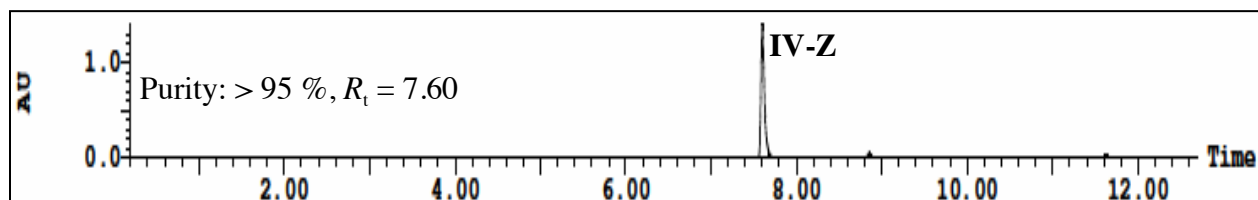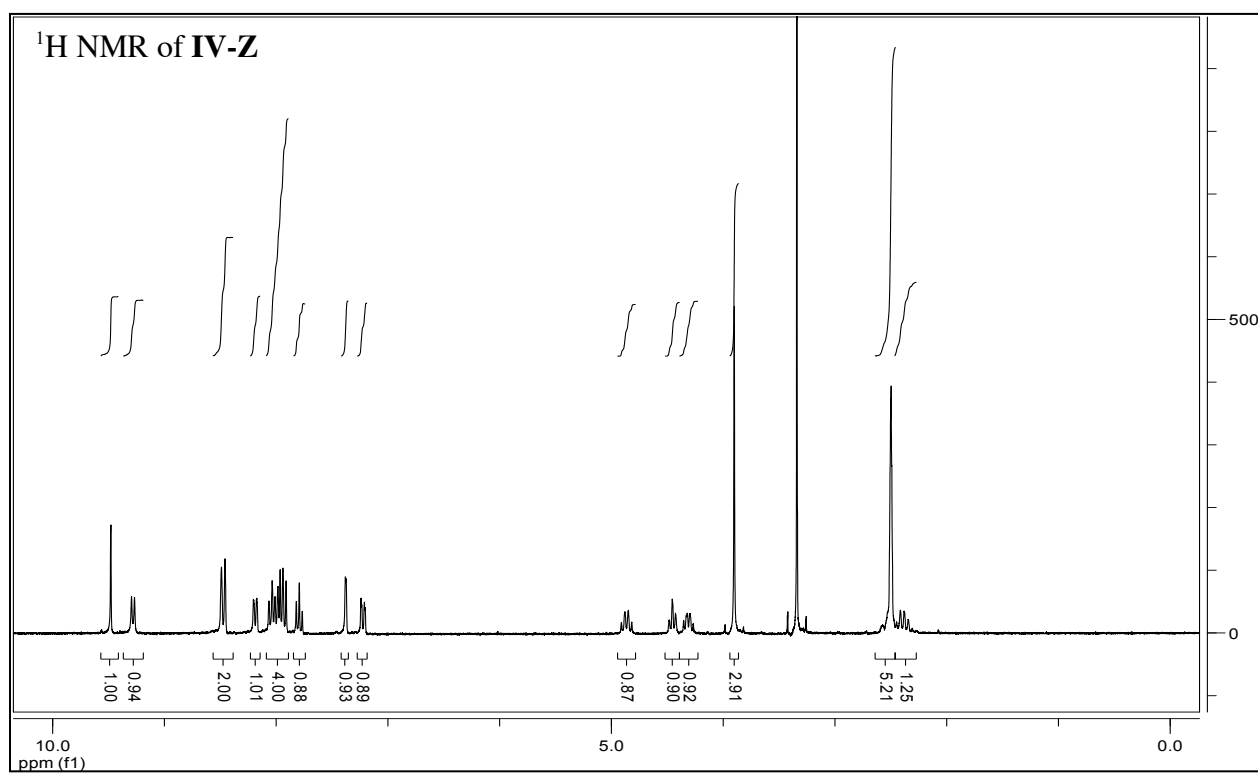

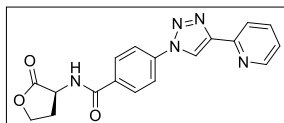

Triazole IV-AA.

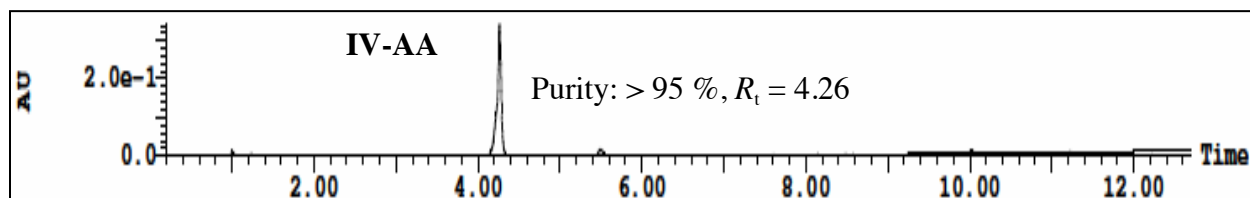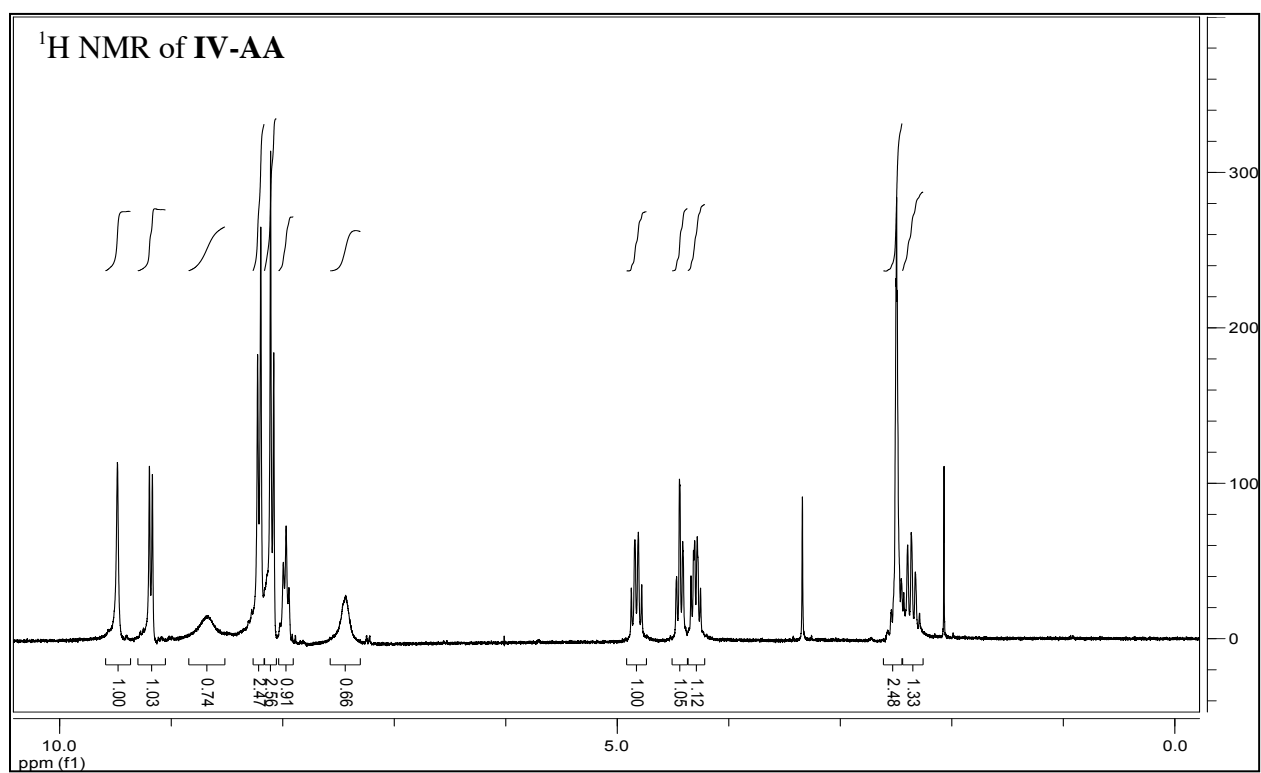

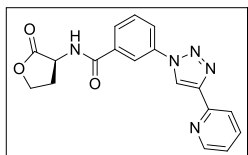

**Triazole IV-AB.**

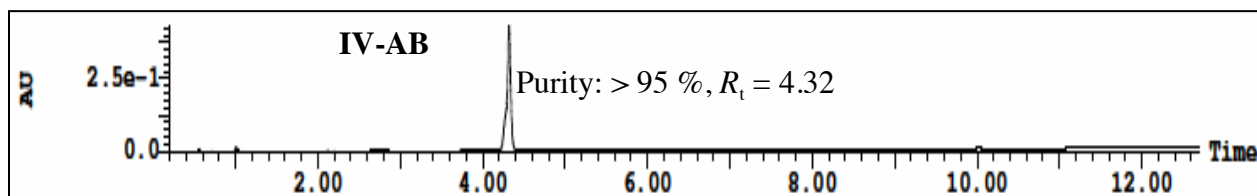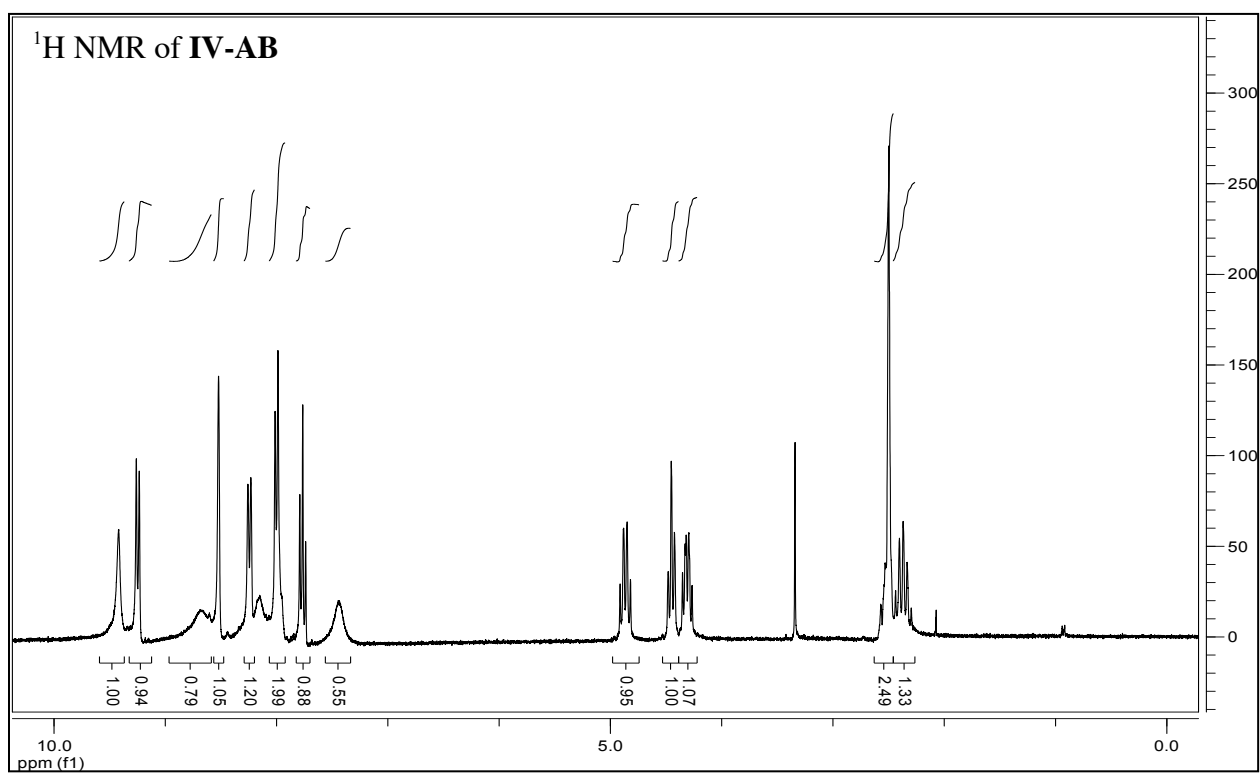

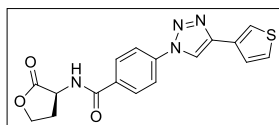

**Triazole IV-AC.**

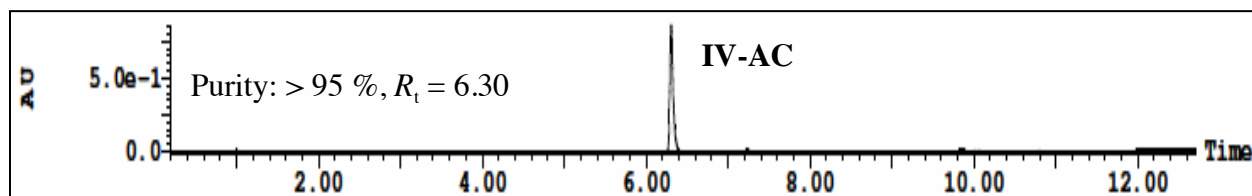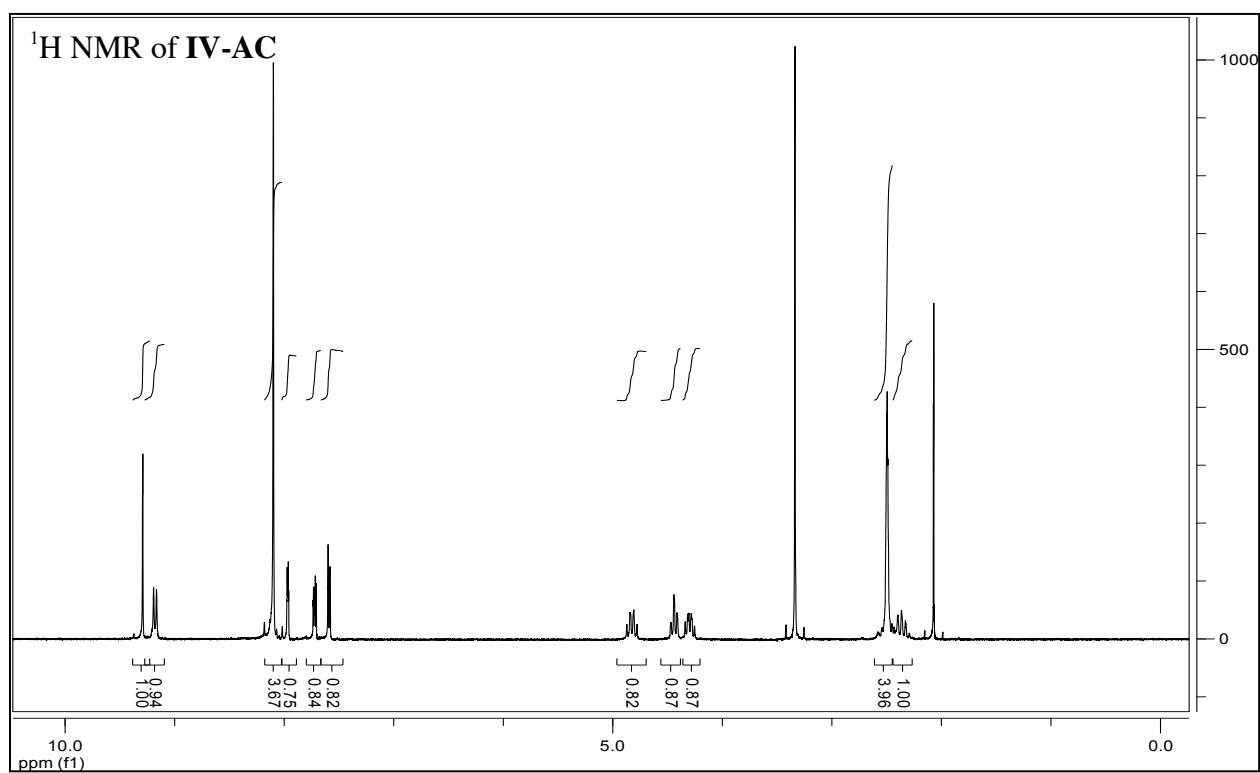





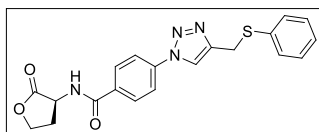

**Triazole IV-AE.**

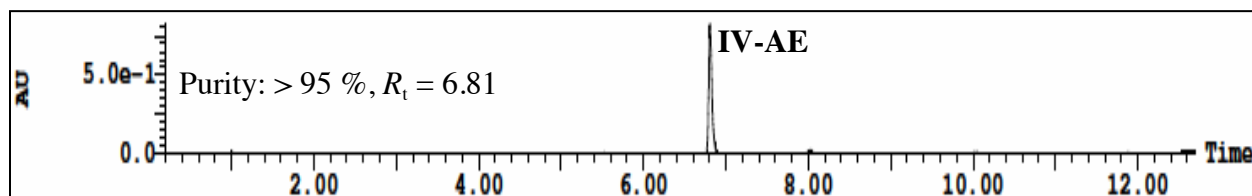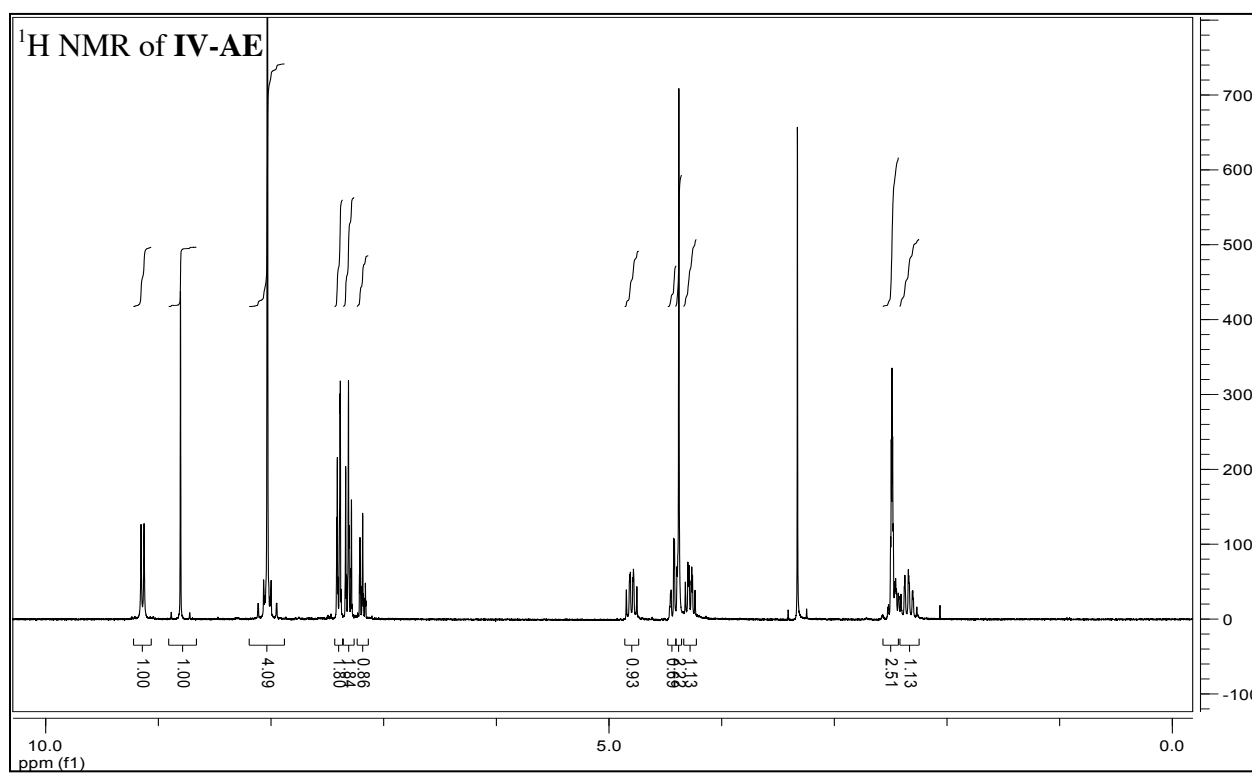

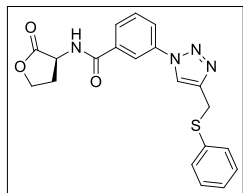

**Triazole IV-AF.**

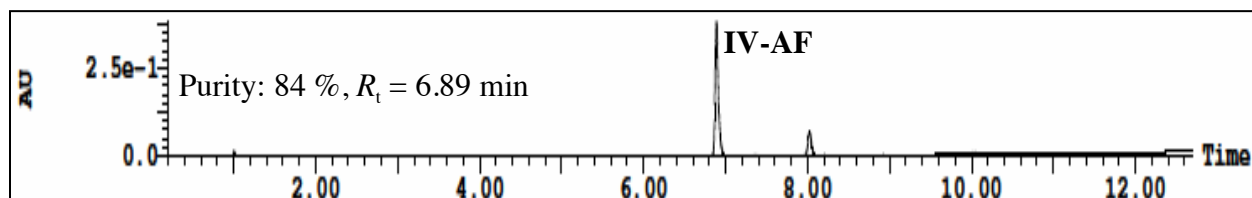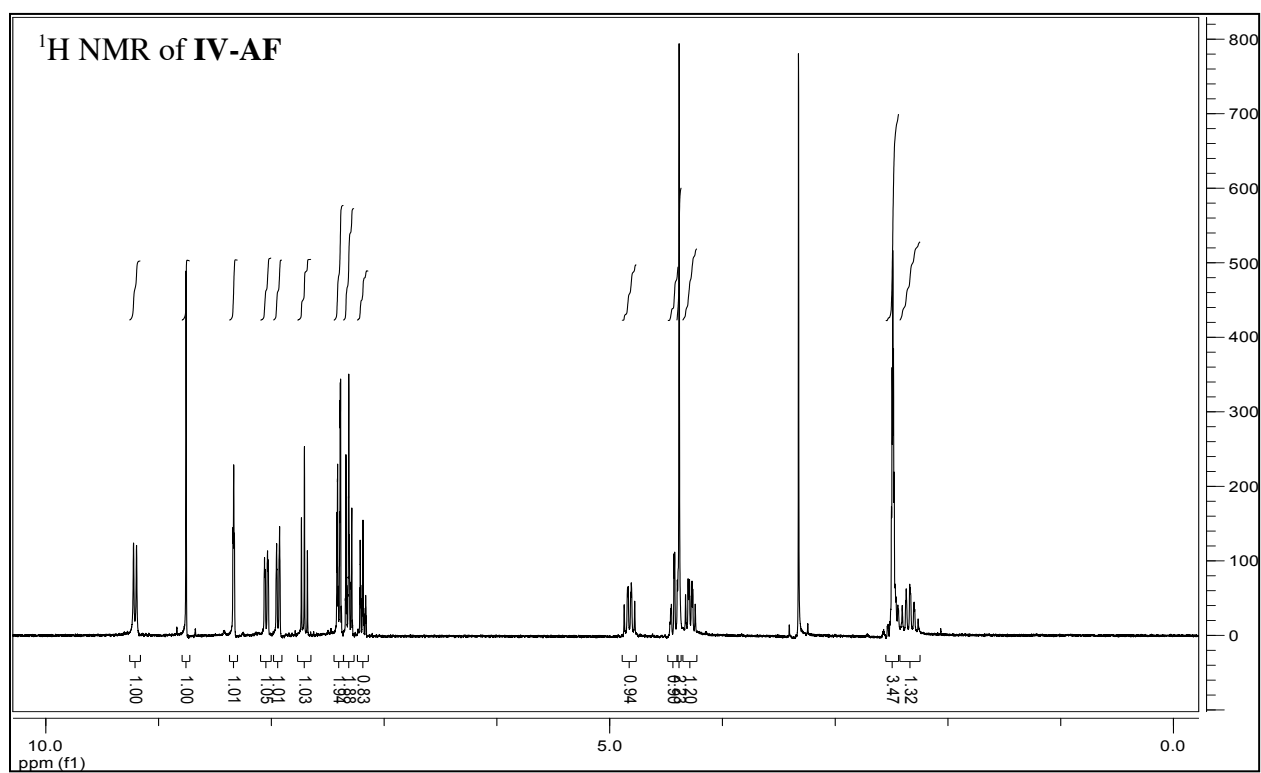

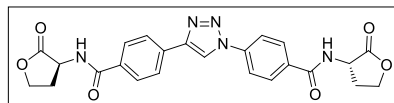

**Bis-homoserine lactone V-A.**

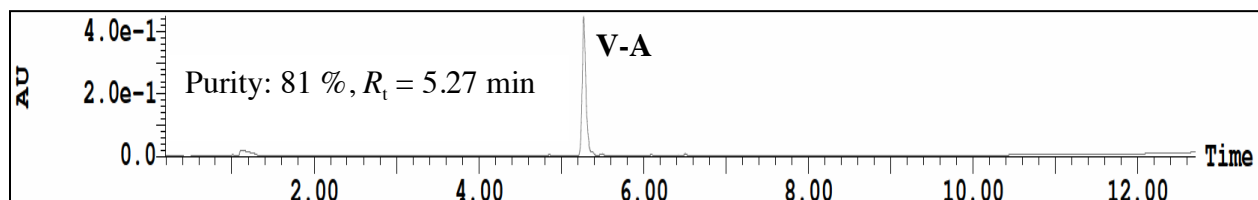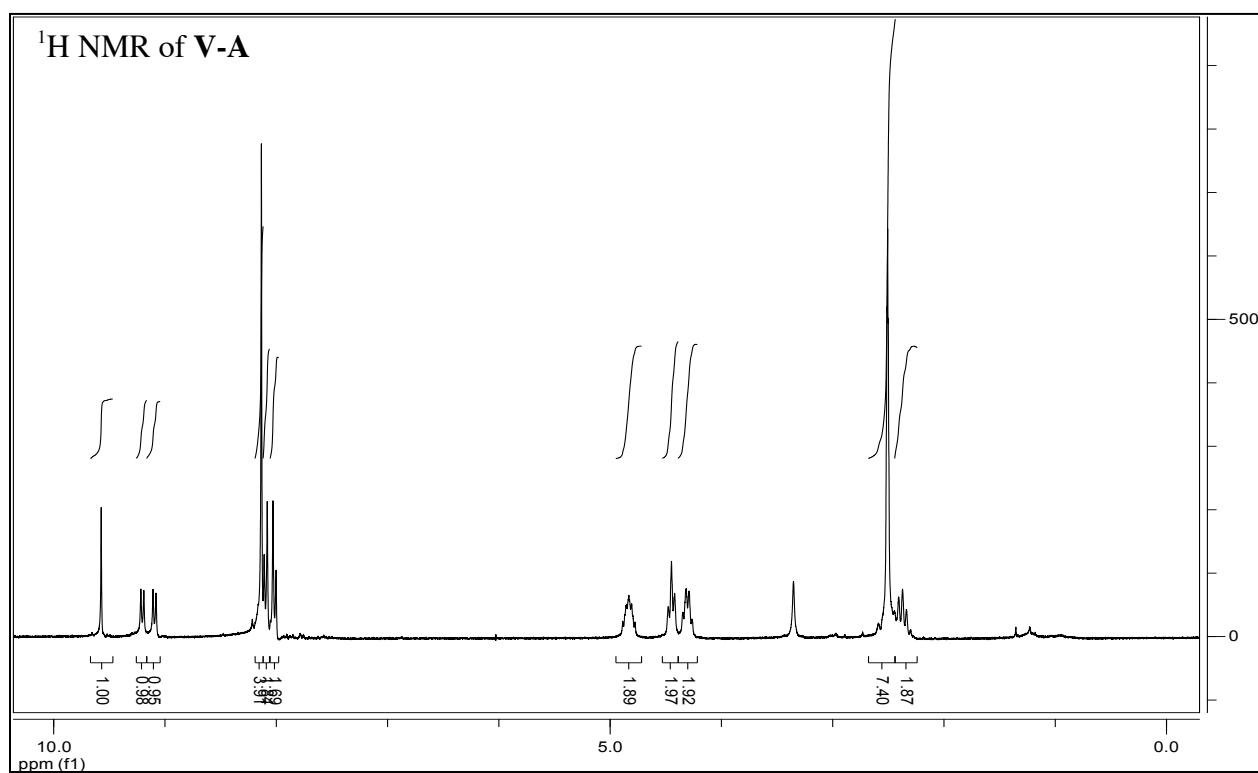

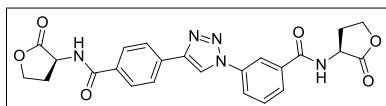

**Bis-homoserine lactone V-B.**

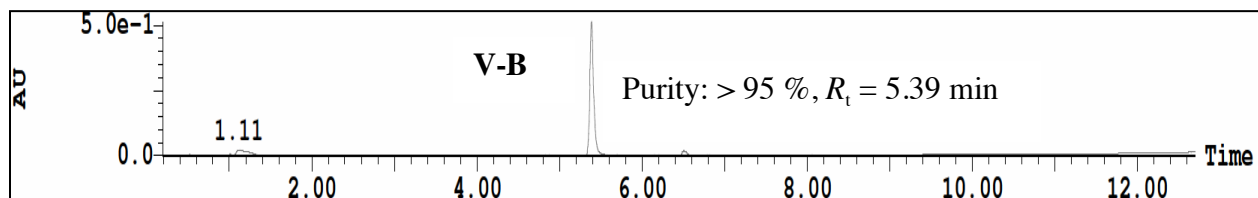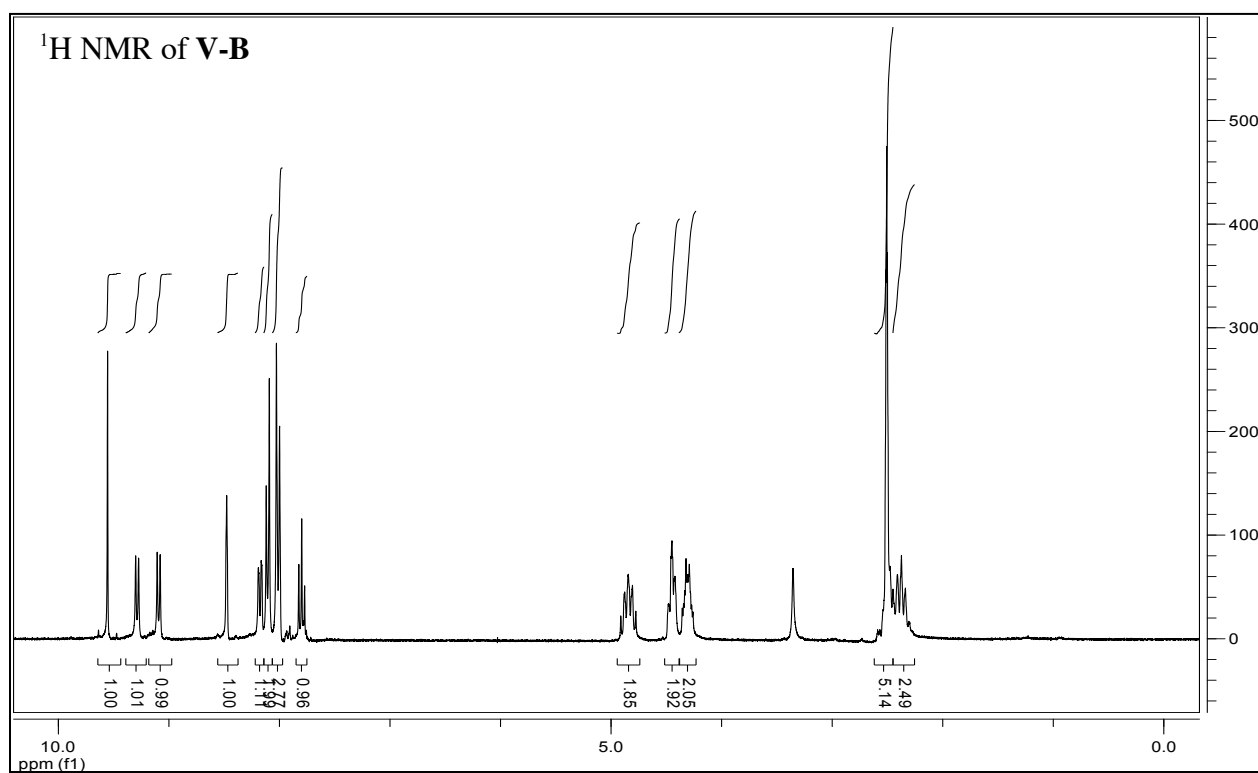

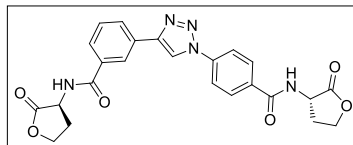

**Bis-homoserine lactone V-C.**

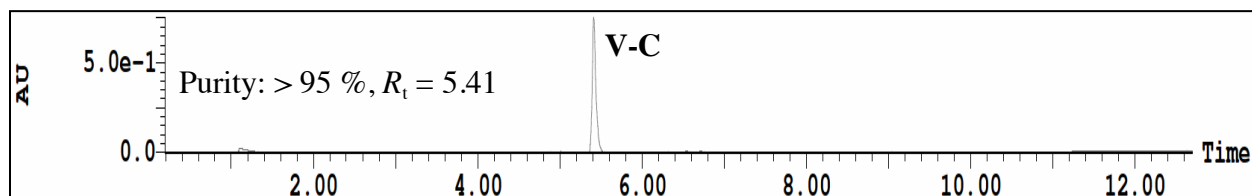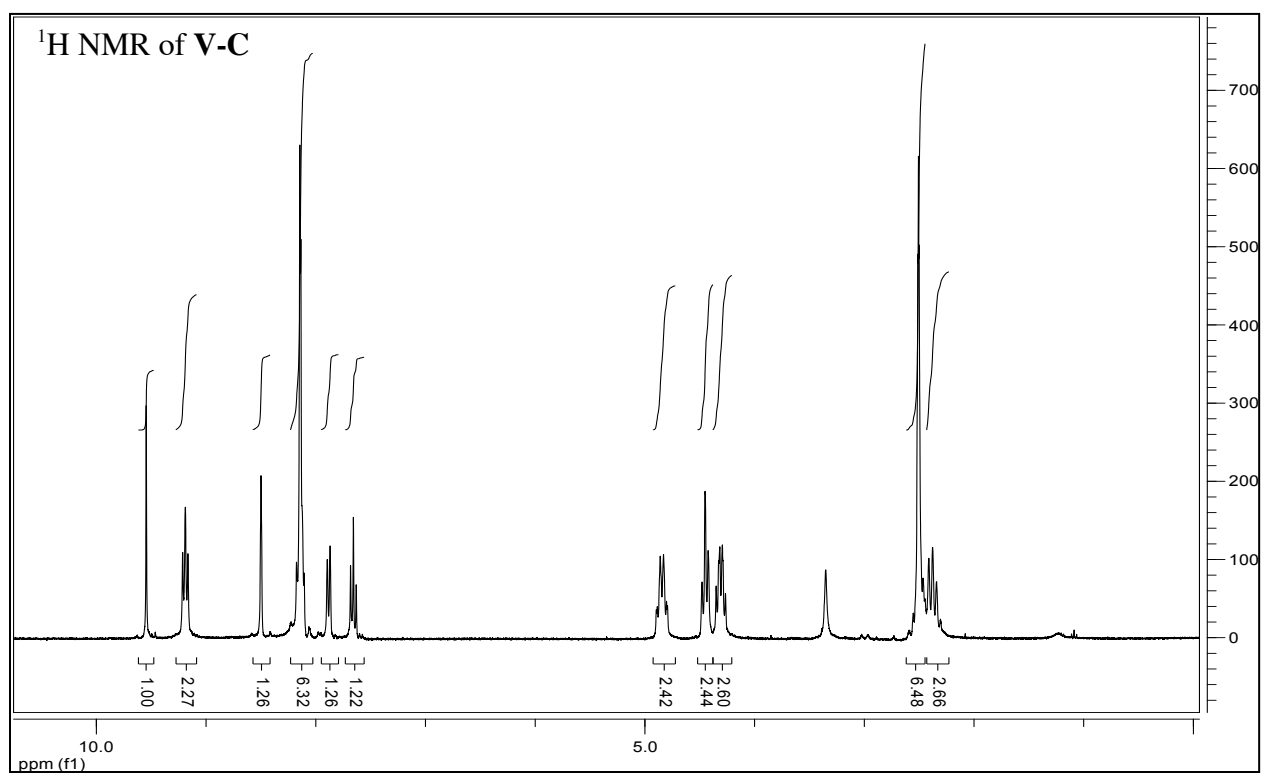

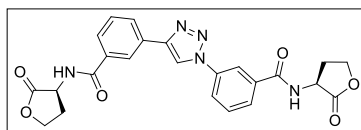

**Bis-homoserine lactone V-D.**

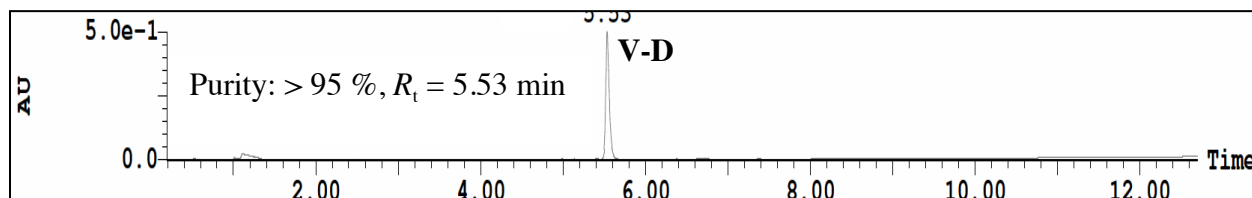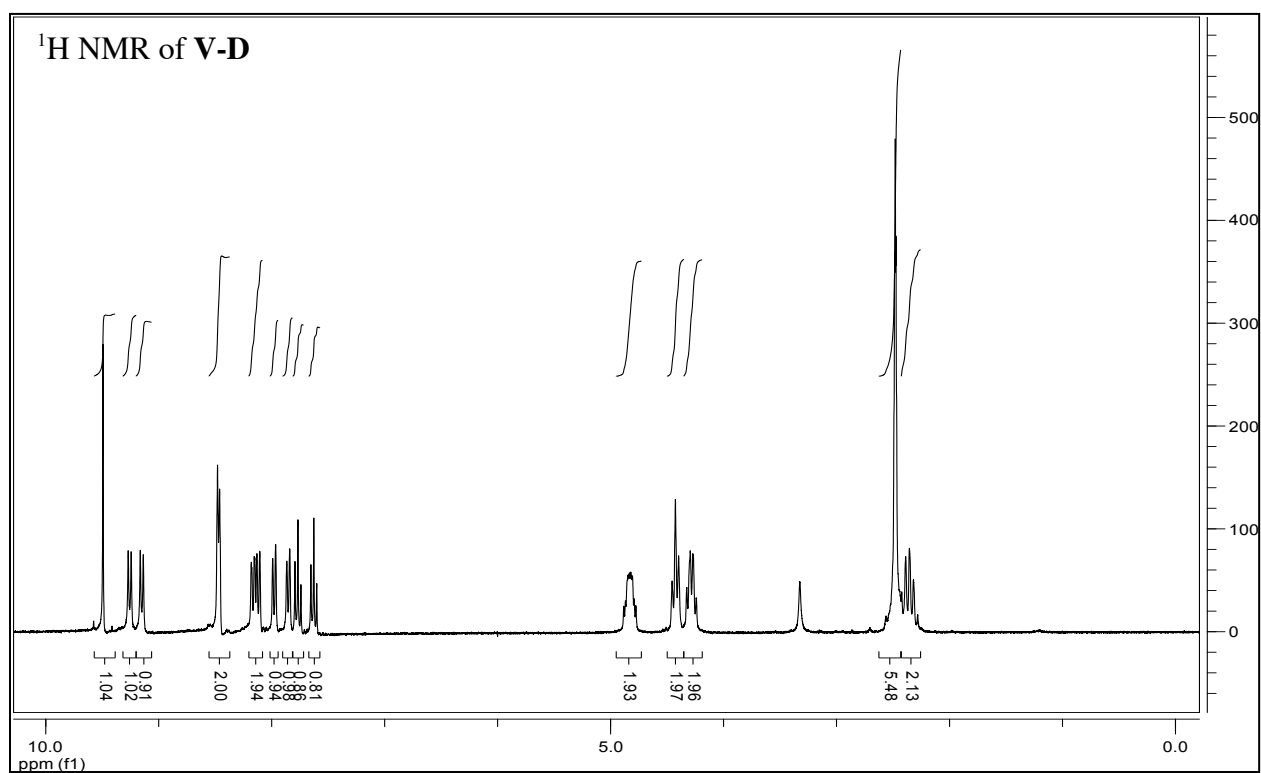

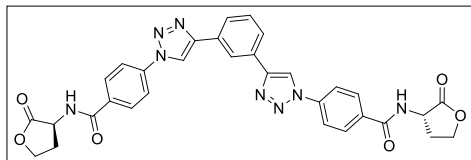

**Bis-homoserine lactone V-E.**

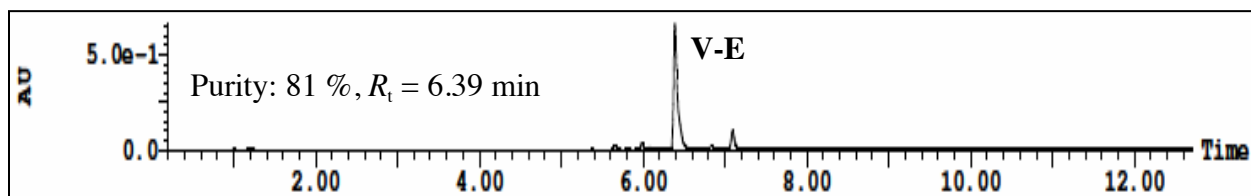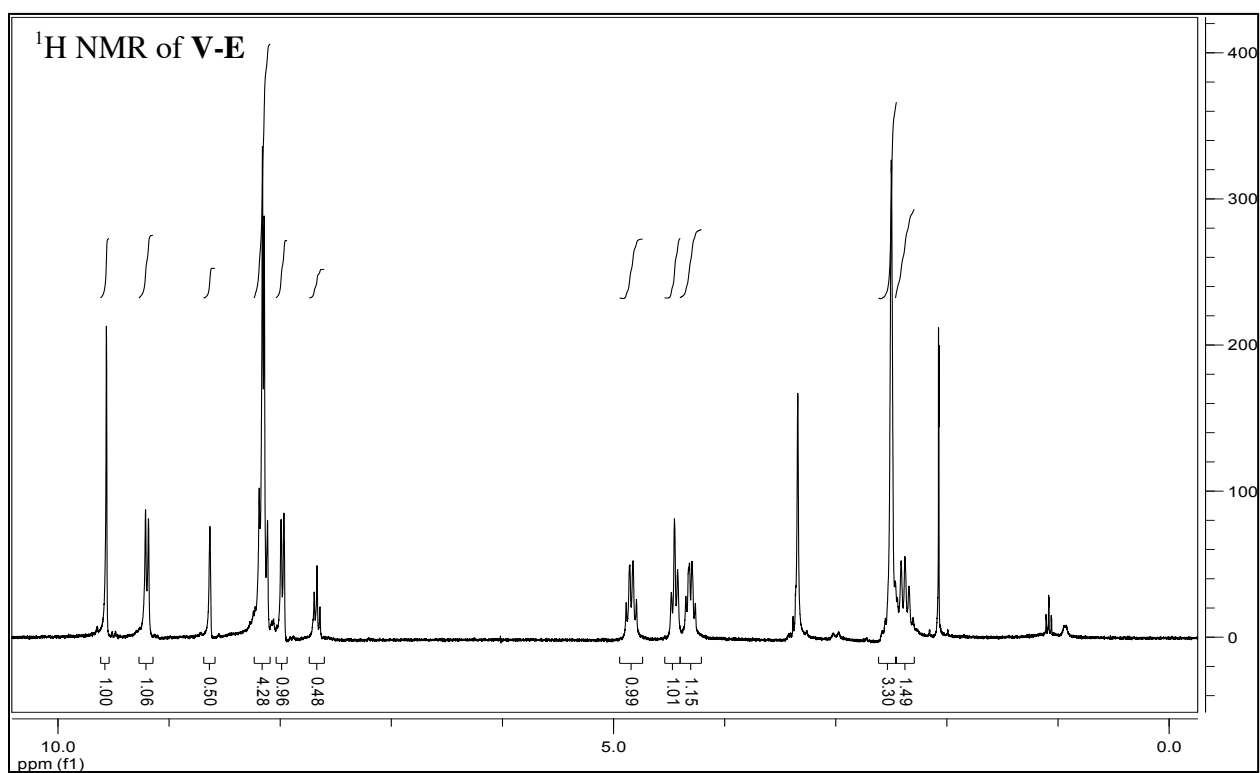

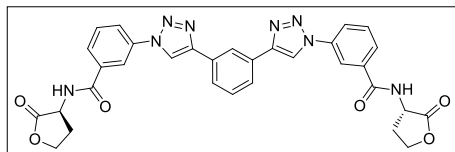

**Bis-homoserine lactone V-F.**

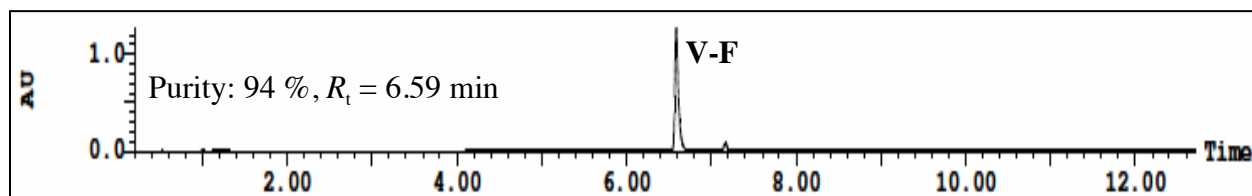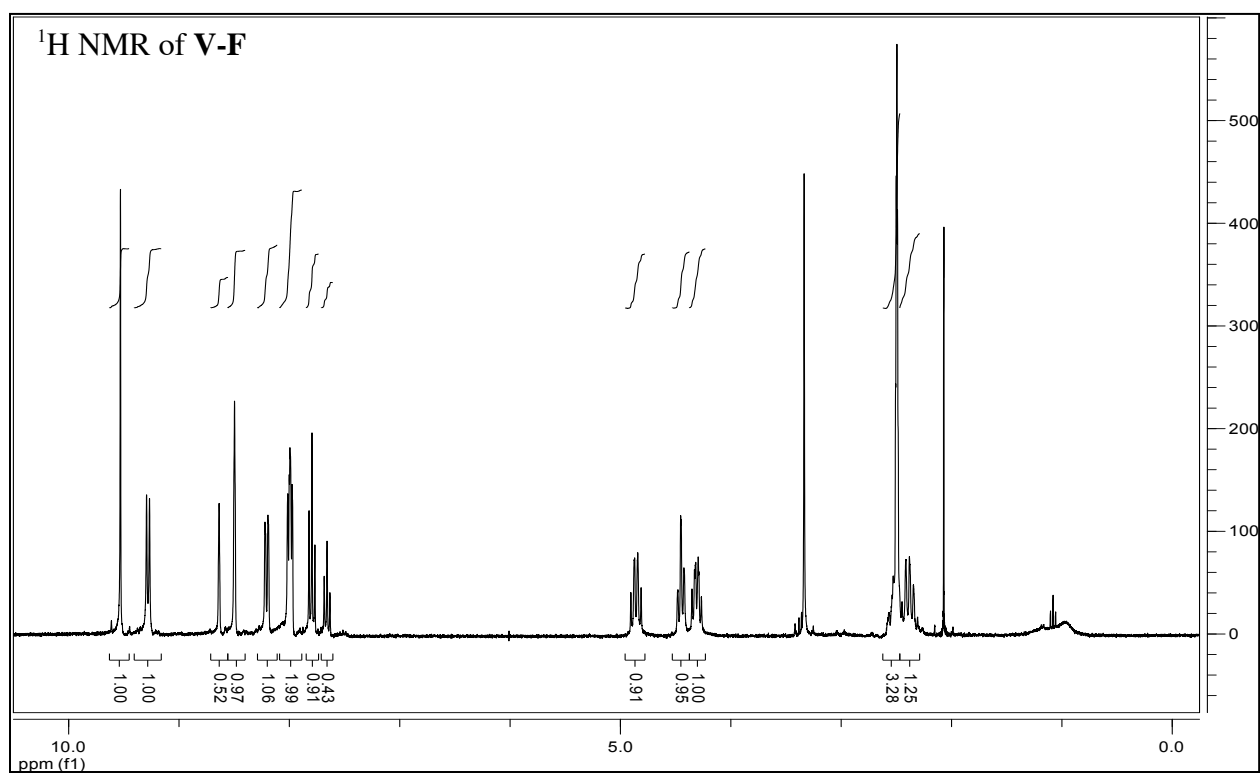



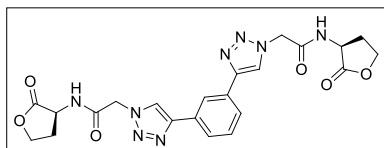

**Bis-homoserine lactone V-G.**

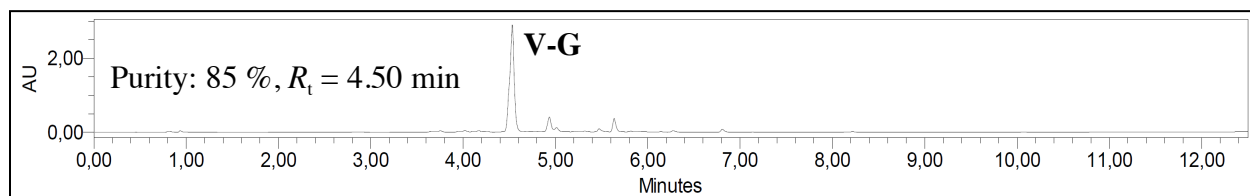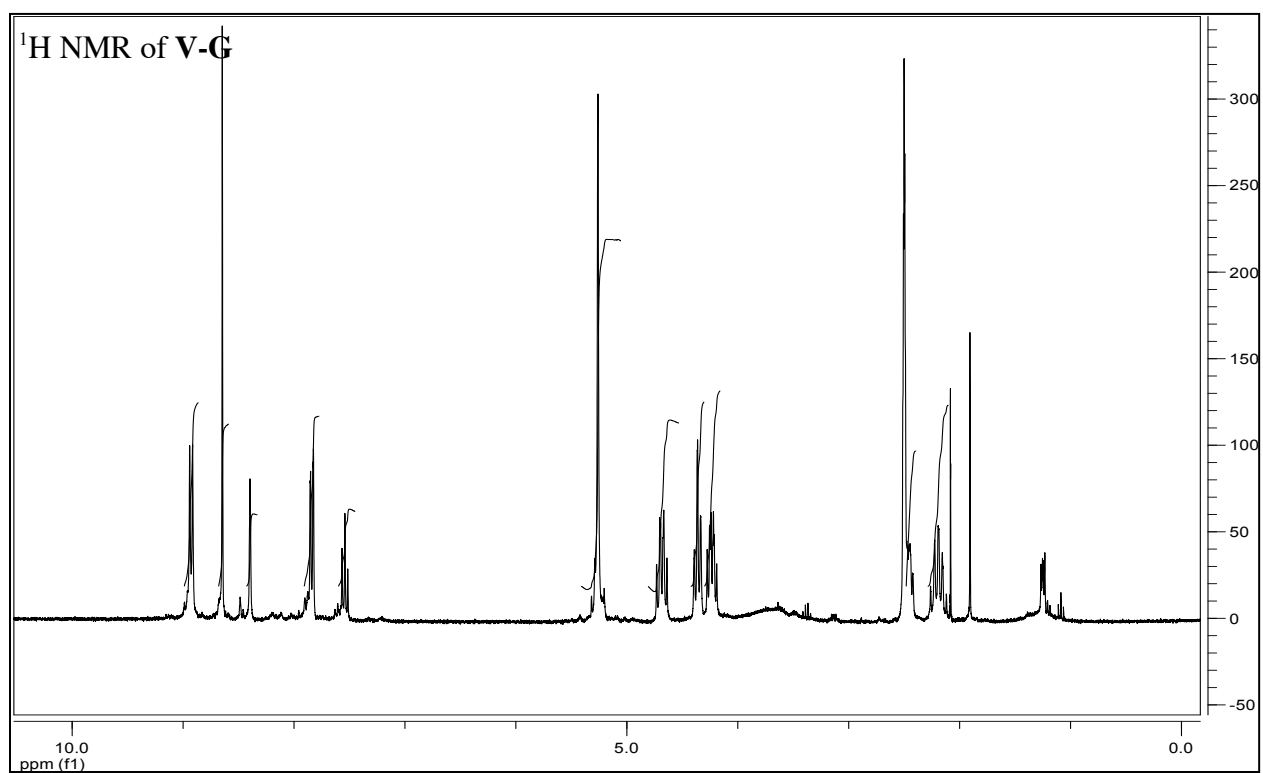

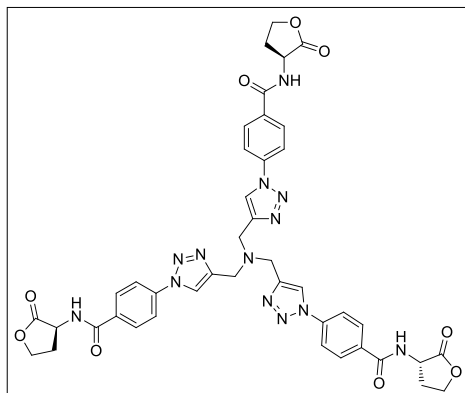

Tris-homoserine lactone V-H.

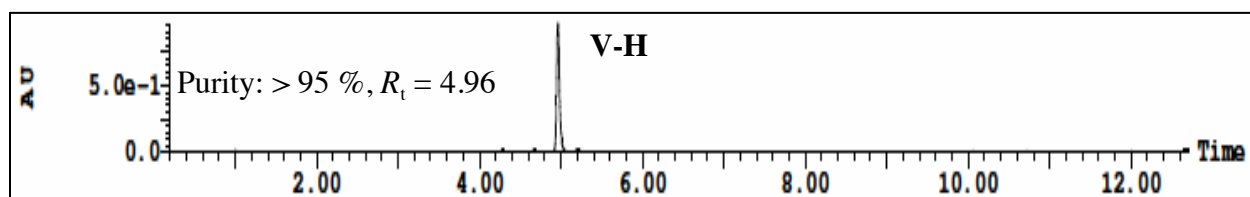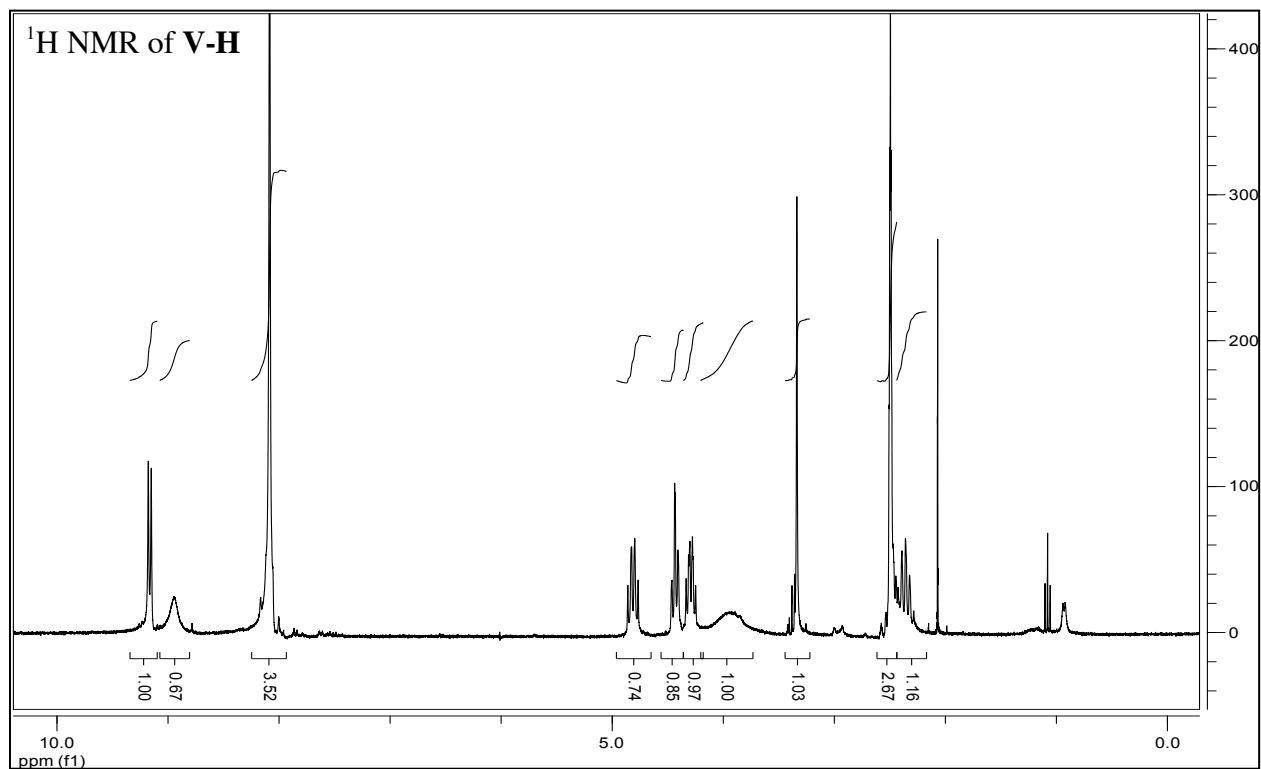

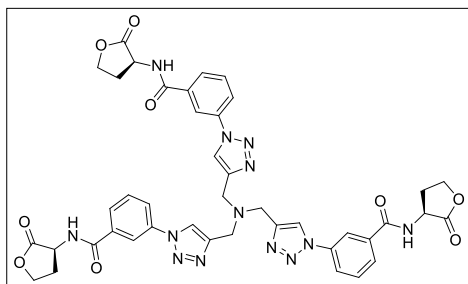

Tris-homoserine lactone V-I.

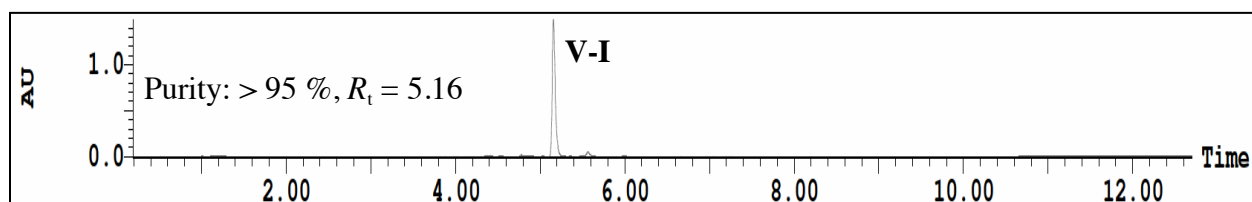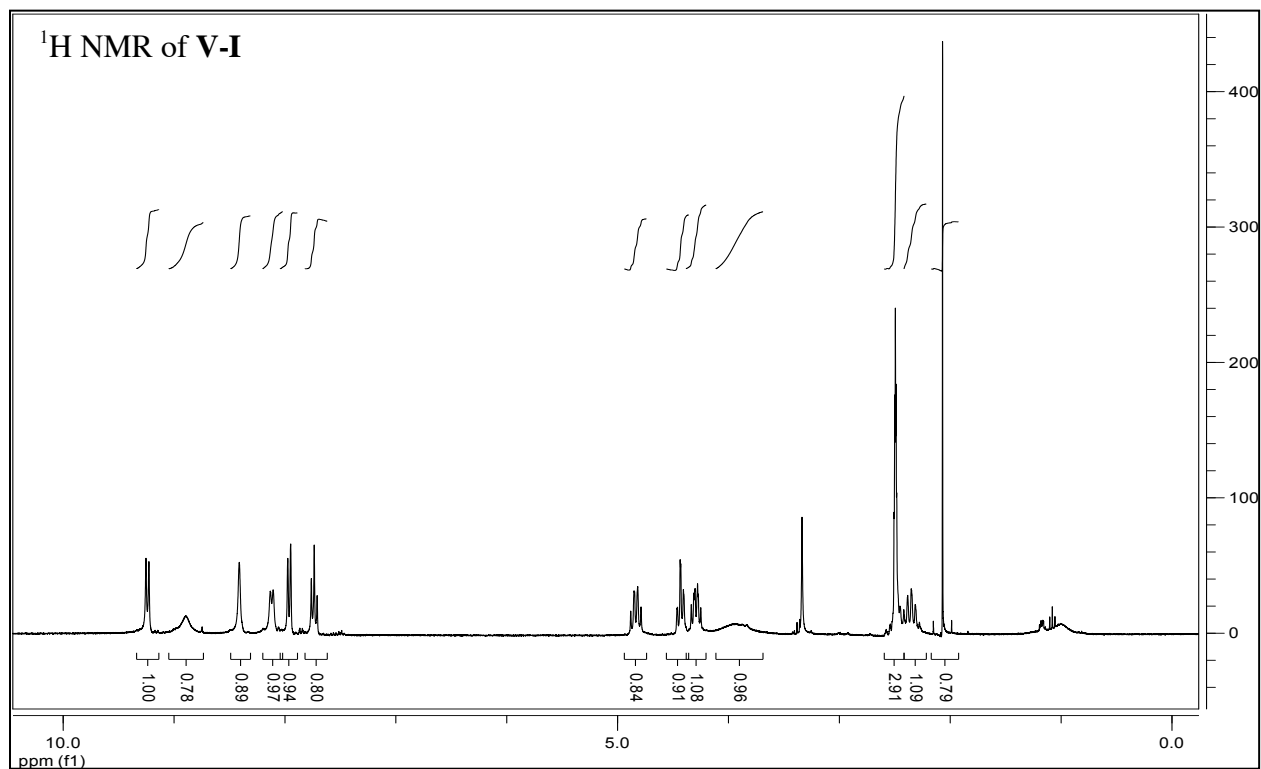

References and notes
